# Supplementary material
Source: PubMed Central journal article supplement (PMC6583576)
Supplement: jama-321-69-s001.pdf [file jama-321-69-s001.pdf]

## Supplementary Online Content

Rosenstock J, Perkovic V, Johansen OE, et al. Effect of linagliptin vs placebo on major cardiovascular events in adults with type 2 diabetes and high cardiovascular and renal risk: the CARMELINA randomized clinical trial. *JAMA*. doi:10.1001/jama.2018.18269

**eAppendix 1.** List of Investigators

**eAppendix 2.** Trial Committees and Independent Statistical Center

**eAppendix 3.** Inclusion Criteria

**eAppendix 4.** Exclusion Criteria

**eAppendix 5.** Definitions of Major Clinical Outcomes

**eAppendix 6.** Description of Superiority Tests of 3-Point MACE and the Secondary Kidney Outcome And Their Sensitivity Analyses and Subgroup Analyses

**eAppendix 7.** Treatment and Observation Times

**eAppendix 8.** Sensitivity and Subgroup Analyses for the Primary Outcome

**eAppendix 9.** Sensitivity and Subgroup Analyses for the Secondary Kidney Composite Outcome

**eAppendix 10.** Exploratory CV Outcomes

**eAppendix 11.** Exploratory Kidney and Microvascular Outcomes

**eAppendix 12.** Hypoglycemia Incidence Overall and in Subgroups at Elevated Hypoglycaemia Risk

**eAppendix 13.** Post-baseline Introduction of New Glucose-Lowering and CV Therapies

**eAppendix 14.** Exploratory CV and Renal Risk Factor Analysis

**eAppendix 15.** Endpoints Prespecified in the Statistical Analysis Plans of CARMELINA

This supplementary material has been provided by the authors to give readers additional information about their work.

## **eAppendix 1. List of Investigators**

**Argentina:** D. Aizenberg, A. Fiorella, N. Edgardo, C. Ianina belen, P. Alonso, M. Walter, K. Maia, S. Guillermo, B. Leandro, R. M. Constanza, N. M. Alejandra, C. Melina, I. L. Ariel, S. Martin, C. Rodrigo, Centro Medico Viamonte, Ciudad Autonoma de Buenos Aires; C. Alvarez, M. Z. Jorge, C. Gabriel, S. German, Hospital Italiano Regional del Sur, Bahia Blanca; I. Bartolacci, G. A. Bolobanich, T. Tale, M. Meritano, M. G. Echeverria, S. P. Gerrini, M. R. y Alvarez, N. Torrijos, Inst. Privado de Inv. Clinicas de Cordoba, Cordoba; M. Berli, J. Coggiola, G. Castañeda, R. Rode, R. Milessi, A. Roude, Hospital Jose, Maria Cullen, Santa Fe; J. Bono, J. Caresani, V. Arias, J. C. Westberg, G. Allende, A. Liberman, Sanatorio Allende S.A., Cordoba; A. Bordonava, S. M. Almagro, C. Gerbaudo, L. B. Schiavi, Clinica Privada Fusavim SRL, Villa Maria; N. Budassi, M. Cecilia, Hospital Interzonal General de Agudos Dr Jose Penna, Bahia Blanca; M. Buncuga, S. Carlos, T. Osvaldo, S. Mercedes, Sanatorio Delta, Rosario; P. Calella, V. M. M. Agustina, M. Aljandro, D. Alberto, M. Fiorella, CIPADI, Godoy Cruz; M. Cantero, M. S. Cariganano, P. Anadon, Centro de Investigaciones Clinicas del Litoral, Santa Fe; L. Cartasegna, M. Gabriela, A. M. Fernanda, Dr Re Matias Alberto, Hospital Italiano de La Plata, La Plata; C. Chacon, Casado Melina, F. M. M. Jazmin, Sanatorio Norte, Rosario, Santa Fe; H. Colombo, E. Coni, S. E. Mattausch, K. Thomsenhall, M. della Torre, M. Morandini, A. Zanini, Clinica Colombo, Cordoba; F. Colombo Berra, H. Margarita, CER Instituto Medico, Quilmes; V. Commendatore, J. Tedesco, P. G. Bolzan, Hospital San Martin, Parana; C. Cuneo, G. Narcisa, Prevencion Cardiovascular Salta, Salta, Salta; V. Fernandez Caputi, S. Pablo, G. Sandra, Instituto Medico Adroque, Adroque; F. Ferre Pacora, M. B. Tinari, H. O. Jure, M. L. Parody, A. Toranzo, Centro Medico Colon, Cordoba; G. Frechtel, S. Yohena, S. Lovecchio, C. Muller, S. Martin, C. Olivera, M. Dib Breyau, G. Bianchi, Hospital Sirio-Libanés, Caba; C. Garcia, V. Luciana, F. M. Florencia, G. D. Ruben, Instituto de Investigaciones Clinicas San Nicolas, San Nicolas; E. Gellersztein, G. R. Rey, C. Sanchez, L. Fornasari, L. Di Pierro, CEDIC - Centro de Investigacion Clinica, Ciudad Autonoma Buenos Aires; G. Giacomi, S. Miguel, T. Laura, C. Gonzalo, C. Ramon, Unidad de Cardiologia Clinica, Mar del Plata; J. Glenney, M. Koretzky, A. Porto, O. Tiberio, A. Ellenberg, R. Saurral, C. Igarzabal, CCBR - Buenos Aires - AR, Ciudad Autonoma Buenos Aires; O. Gomez Vilamajo, J. Matkovich, Sanatorio San Martin S.A., Venado Tuerto; S. Gorban de Lapertosa, Mirtha Villagra, G. Cuzziol, M. de la Cruz, R. Pinchetti, M. Mierez, C. Lopez, Centro Universitario de Investigacion Corrientes, Corrientes; V. Gorosito, A. Gabito, A. Kleiban, Instituto Medico CENICLAR-C de Investigaciones Clinicas, Rosario; L. Grosembacher, P. Adrian, R. M. Paula, G. Javier, Hospital Italiano, Ciudad Autonoma Buenos Aires; F. Kraft, F. Andres, Centro Medico CIR, Rosario; F. Krynski, P. R. Nicolas, F. Marcelo, F. A. Alfredo, Instituto de Investigaciones Clinicas de Quilmes, Quilmes; R. Leon de la Fuente, C. Natalia, Centro Cardiovascular Salta, Salta; H. Luquez, Yanina Recuero, N. S. Becchetti, M. Ruiz, M. Costantino, G. Vazquez, C. Guzman, P. Pelatia, Centro Medico Luquez, San Vicente; L. Maffei, S. Sassone, M. Yantorno, G. Prado, B. Khron, Consultorios Asociados de Endocrinologia e Invest Clinica, Ciudad Autonoma Buenos Aires; N. Maldonado, L. Gustavo, V. P. Veronica, Instituto de Hematologia y Medicina Clinica Ruben Davoli, Rosario; J. Marino, C. Viviana, A. Elizabeth, C. Alejandra, R. Oscar, Centro Medico Dr. Javier Marino, Haedo; G. Moises Azize, Mariela Yañez Gallardo, M. L. Escudero, E. Vargas, H. Ramos, C. Lucero, A. Zanini, IPAC - Clinica Privada Caraffa SRL, Cordoba; M. Najenson, I. T. Crocci, A. Chiesa,

Instituto CAICI, Rosario; L. Nardone, S. Dominguez, L. Nardone, A. Zanini, CEMAIC - Centro Medico Especializado, Cordoba; F. Perez Manghi, M. Grossman, G. L. Giudice, A. Romeo, Centro de Investigaciones Metabolicas, Ciudad Autonoma Buenos Aires; D. Piskorz, C. Miguel, D. Susana, U. Noeli, S. Rosa, Sanatorio Britanico, Rosario; V. Quevedo Martin, A. M. Soledad, M. M. Virginia, G. M. Lorena, CCBR Tucuman, San Miguel de Tucuman; A. Prado, L. Veronica, H. Eduardo, P. G. Adolfo, W. Florencia, Investigaciones Clinicas Tucuman, San Miguel de Tucuman; L. Rista, C. Scolari, N. Rojas, V. Bertolio, CEDyN, Rosario; R. Saa Zarandon, S. Jair, C. Orlando, Hospital Central de Mendoza, Mendoza; H. Sanabria, De U. Ignacio, C. Viviana, R. C. Marina, Instituto Cardiovascular de Buenos Aires, Ciudad Autonoma Buenos Aires; R. Sarjanovich, G. Scaro, C. M. Huerta, Hospital Cordoba, Cordoba; L. Schiavi, M. Mana, M. Gutierrez, A. Dain, R. Gavicola, Clinica Privada del Prado, Cordoba; H. Sessa, J. Sacripanti, R. Felman, P. Vilarino, Instituto Medico Fundacion Grupo Colaborativo Rosario, Rosario; M. Sicer, M. Lagrutta, J. Sala, Instituto de Investigaciones Clinicas de Rosario, Rosario; T. Smith Casabella, H. M. Cecilia, B. Carlos, CORDIS S.A., Salta; G. Viñes, R. Javier, Hospital Privado de Comunidad, Mar del Plata; M. Vico, P. Lanchiotti, C. Martella, L. Torres, Instituto de Investigaciones Clinicas Zarate, Zarate; A. Villarino, M. P. de Valle Molina, J. M. Martinez, C. Farias, S. Bertola, M. Rojas, P. N. Guzman, J. S. Nisi, D. F. Martinez, M. Barrionuevo, Instituto DAMIC - Fundacion Rusculleda, Cordoba; N. Vita, A. Lopez, E. Vottero, M. E. Giuliano, L. Paron, Instituto Medico de la Fundacion Estudios Clinicos, Rosario; D. Vogel, P. Mele, H. Imposti, A. Dominguez, Inst de Inv Clinicas-Bahia Blanca, Bahia Blanca; C. Zaidman, G. Fernando, CIPREC, Ciudad Autonoma Buenos Aires; **Brazil:** M. de Oliveira Beck, P. A. Beltrame, D. Chemello, Centro de Pesquisa Medica Santa Maria Ltda, Santa Maria; Dr R. Magalhaes Montenegro Junior, A. P. Abreu, V. Fernandes, J. Saboia, L. Rodrigues, M. Carvalho, M. H. Gurgel, D. Gadelha, ICE-HUWC - Instituto Cearense de Endocrinologia do Hospital Universitario Walter Cantidio, Fortaleza; C. Slompo Ramos, V. Z. C. Borba, Sociedade Hospitalar Angelina Caron, Parana; M. Moyses Golbert, M. Pitthan, L. Golbert, R. Valentini, Santa Casa de Misericordia de Porto Alegre, Rio Grande do Sul; L. Santos Canani, J. L. Gross, L. H. Canani, A. M. Valenti, C. C. Sartori, Centro de Pesquisas em Diabetes Ltda, Rio Grande do Sul; O. Pereira Dutra, E. Azevedo, A. Azevedo, R. Vaz, H. Vaz, Instituto de Cardiologia do Rio Grande do Sul, Rio Grande do Sul; Fe. Alves da Costa, L. M. Alves da Costa, Clinica Paulista de Doencas Cardiovasculares Ltda, Sao Paulo; D. Panarotto, F. V. Lain, F. E. Camazzola, B. S. Dellomea, IPCEM - Instituto de Pesquisa Clinica para Estudos Multicentricos - Universidade de Caxias do Sul, Rio Grande do Sul; R. Rech, P. E. Pizzato, C. E. Nunes, C. Jaeger, D. Silveira, L. Wagner, L. F. G. Machado, Hospital Universitario/ Associacao Educadora São Carlos – AESC – Campus ULBRA, Rio Grande do Sul; R. Roginski Rea, A. Boeving de Bem, J. M. Alves, T. H. Jonasson, F. J. Malucelli, HC - UFPR - Hospital de Clinicas da Universidade Federal do Parana Avenida Agostinho Leao Junior, 285 - Alto da Gloria, Parana; R. Barcellos Betti, A. C. Lerario, Incor - Instituto do Coracao – HCFMUSP, Sao Paulo; H. Kurtz Lisboa, J. Batista J. Bem, G. Tres, C. B. Tavares, A. Nardi, M. Pozzatto, L. Backes, J. B. C. Reolao, E. Scariot, E. Ziguier, D. M. B. Baldissera, Hospital Sao Vicente de Paulo, Institute of Education and Research / Cardiovascular Research Unit, Rio Grande do Sul; L. Maciel Griz, D. Antunes, F. Victor, K. Freire, A. Barros, B. Costi, M. Sa, A. Carneiro, Centro de Pesquisas Medicas Basica e Clinica Ltda, Pernambuco; J. Soares Felicio, K Felicio, P Penha, J Ferreira, F Melo, A Alves, A C Souza, L Costa, D. Pinheiro, HUJBB-UFPA - Hospital Universitario Joao de

Barros Barreto - Universidade Federal do Para, Belem, Para; L. Andreotti Turatti, G A Augusto, C C Leanca, A C Santomauro Junior , CP Quali Pesquisa Clinica Ltda, Sao Paulo; A. Costa e Forti, R Sena, A E Marinho, C Facanha, Centro de Estudos em Diabetes e Hipertensao, Ceara; K. Barroso de Souza, A S Barroso de Souza, W C Barroso de Queiroz, Via Medica Clinica Medica Integrada Ltda, Goias; S. de Oliveira Leite, S do Carmo Vieira, L F Ramos Gubert, A C Olsen, G Piazzetta, A R Fuck, M A Ferreira, Cline Research Center (Leite PS Consultoria Medica Ltda), Parana; J. Ribas Fortes, T J Drulla Brandao, M Padilha, F Alves, E Radice, J A dos Santos, PUC-Trials – Núcleo de Pesquisa Clínica da Escola de Medicina da PUCPR/EPICENTER, Parana; R. Simoes de Almeida, D M Franco, W F Saporito, IMC - Instituto de Molestias Cardiovasculares Tatui, Sao Paulo; F. Goldberg Eliaschewitz, D Reis Franco, K Nunes de Siqueira, R de Carvalho Camara Bona, P R Rizzo Genestreti, D L Costa de Castro, G de Lima Visconti, C R E Pinho da Silva Sampaio, F de Almeida Palhares, H P Konigsfeld, E F Alves, C Kauffman Rudenberg Feder, B D de Almeida Leao ,CPCLIN - Centro de Pesquisas Clinicas Ltda, Sao Paulo; J. Kerr Saraiva, S Rodovalho, M K Martins Costa, N Fraccari Pires, HMCP - Hospital e Maternidade Celso Pierro - PUC-Campinas, Sao Paulo; E. Lanna Figueiredo, G F Werner, J C de Faria Garcia, I Viana de Paiva, B E Gomes Quirino, Hospital Lifecenter/ Lifecenter Sistema de Saúde S/A, Minas Gerais; R. Vieira Botelho, R Alves da Silva, A L Cautella Navarro, C Lourenco, A Donizetti de Sena Pereira, F B Britto Arantes, D S Boner, Eurolatino Pesquisas Medicas Ltda, Minas Gerais; J. Abdalla Saad, E Belisario Falchetto, E Kei Marquesini Washizu, A Mandil, N L Pimenta, F A Tofani, T F Fonseca, L A Teixeira, Hospital Felicio Rocho, Minas Gerais; L. Maia, M A Benes Teixeira Lemos, O M Coelho Costa Mouco, M Arruda Nakazone, Fundacao Faculdade Regional de Medicina de Sao Jose do Rio Preto – Centro Integrado de Pesquisa (CIP); Sao Paulo; L. Reis Katz Weiland, J M Bohn, Hospital Bruno Born, Rio Grande do Sul; M. Nasser Hissa, M Hissa, F Araripe, Centro de Pesquisas em Diabetes e Doencas Endocrino-Metabolicas, Ceara; F. Carvalho, G B Cancado, R Wang Neuenschwander, Hospital Vera Cruz - NUPEC - Nucleo de Pesquisa Clinica, Minas Gerais; A. Chacra, A S Fusaro, E de Mendonca, Hospital Sao Paulo, Sao Paulo; C. Cercato, A Halpern, B B Alves, Hospital das Clinicas da Faculdade de Medicina da USP, Sao Paulo; M. Braga Braile, R S Sestito, E M Mustafa, V R Ribeiro Ferreira, B C Sbardellini, P D Sales de Almeida, Instituto Domingo Braile, Sao Paulo; F Villaca Guimaraes Filho, M M Piedade, I Ribeiro de Castro Bienert, J F Braga, J M Saes Braga, R A Sartori Daher, A Rodrigues, R A Barreto da Silva, ICM - Instituto do Coracao de Marilia, Sao Paulo; T. Franco Hirakawa, E Elias Terra, E Cavalcanti Farias, M Gabriela de Faria Figueiredo, L Casari da Silva Lima, Dr. Consulta, Sao Paulo; K. Barbosa Kersten Moraes, I Avelino, CAEP - Centro Avancado de Estudos e Pesquisas Ltda, Sao Paulo; U. Prynck Flato, F L Plavnik, Hospital Alemao Oswaldo Cruz, Sao Paulo; E. de Souza Portes, M E Moreira, M Vendramini, R Veloso, M Padilha, A Rodrigues, R Adam, S Santos, Iamspe - HSPE - Hospital do Servidor Publico Estadual Francisco Morato de Oliveira, Sao Paulo; N. Sayeg, D Almeida Guerrero, Clinica Dr. Norton Sayeg Ltda – Epp, Sao Paulo; M. Madeira, J Siqueira, R Pinheiro, A Villacorta, A C Mellazi, T Braga, S Kaiser, B Paolino, CCBR Brasil Centro de Pesquisas e Analises Clinicas Ltd, Rio de Janeiro; **Bulgaria:** I. Lefterov, A Marinchev, S Angelova, Fifth MHAT - Sofia EAD, Sofia; N. Klyuchkova, Z Lybomirova, Y Kerekovski, DCC "Equita" EOOD, Varna; T. Kuneva, D Penkova, DCC 1 - Ruse, EOOD, Plovdiv; G Levterov, E Videnova, P Georgieva UMHAT "Kaspela", EOOD, Plovdiv, A. Shinkov, A M Borissova, J Vlahov, L Dakovska-Dekova, USHATE 'Acad. I.

Penchev', EAD, Clinic of Thyroid and Metabolic Bone Diseases, Sofia; M. Lucheva, P Luchev, MHAT "Dr. Hristo Stambolski", EOOD, Kazanlak; M. Temelkova, K Borisova, MHAT - Blagoevgrad, EOOD, Blagoevgrad; S. Tsenov, V Andreeva, MHAT "Lyulin", EAD, Sofia; V. Margaritov, G Arasheva, MHAT "Yuliya Vrevska - Byala", EOOD, Byala; L. Lozanov, R Borisov, D Gorcheva, MHAT Tokuda Hospital Sofia, AD, Sofia; **Canada:** S. Henein, S Whatley, M Boutros, N Kalyniuk, SKDS Research Inc., Newmarket; J. Berlingieri, W Niskier, JBN Medical Diagnostic Services Inc., Burlington; G. Hoag, D Hepburn, M Harvey, P Manjoo, Discovery Clinical Services Ltd., Victoria; J. Yale, M Sherman, M Tsoukas, W Rehman, McGill University Health Centre/Glen Site / Royal Victoria Hospital, Montreal; M. Mason, M Santerre, LMC Clinical Research dba Manna Research Inc. Vancouver, Vancouver; J. De Kock, F Barkhuizen, C Rooke, C Gill, J Kooy, G Burgoyne, J de Kock, G Degen, L Hockman, R Invik, P Roberts, K Ward, The Medical Arts Health Research Group, Penticton; H. Alasaad, Abdel-Salam Susan, V Davies, LMC Diabetes & Endocrinology, Barrie; N. Gupta, J Milhalidis, L Grossman, N Agawal, RN., LMC Endocrinology Centres (Markham), Markham; Z. Yared, Rwaheed, S Nouhad, A-J Nahla, LMC Endocrinology Centres (Montreal), Ville Saint-Laurent; H. Khandwala, A Warwick, D Wadehra, A Manan, J Vecchiarelli, N Aslam, A Ferrao, LMC Endocrinology Centres Ltd., Etobicoke; F. St-Maurice, Via Car Recherche Clinique Inc, Brossard; R. Collette, Bruce Davey, Trial Management Group, Burnaby; R. Labonte, Sarah Nawaz, Dr R. Labonté Professional Medicine Corporation, Sudbury; B. Coutu, Paolo Costi, I Greiss, F Mansour, J-M Raymond, W Saint-Phard, CHUM Hôpital Notre-Dame, Montreal; I. Nadra, A Della Siega, L Vasquez Barahona, P Klinke, H Contractor, M Fryer, Chandra N, B Conti, L Telzer, S Robinson, S Sorensen, H Cara, N Lounsbury, E Martin, L Mitchell, E Pelzer, S Nelson, Fraser Clinical trials, Victoria Heart Institute, Victoria; M. Jones, J Cox, G Luco, T Trhoughton, Cook Med Research, Victoria; S. Nawaz, R Labonte, Sudbury Cardiac Research, Sudbury; G. Chouinard, A Frechette, M-C Rhéaume, Recherche Clinique Sigma Inc., Quebec; J. Cusson, J-P Faucher, V Dery, Centre de santé et de services sociaux Champlain-Charles-Le Moyne, Greenfield Park; A. Kelly, B Wai-Ling Miranda, N Al-Kayssi, Alta Clinical Research Inc., Edmonton; P. Malette, P Rheault, P Fredette, Medicor Research Inc, Sudbury; R. Dumas, J Palardy, A Belanger, Centre de Recherche Clinique de Laval, Laval; P. Boucher, B Doyon, J Charbonneau, Recherche Invascor Inc., Longueuil; G. Bailey, M Odendaal, K Stephan, J Badenhorst, the Baily Clinic, Red Deer; D. Knight, A Thurgood, M Johnston, E Cooper-Rosen, R Jagger, M Green, True North Clinical Research, Halifax; S. John Weisnagel, A Gangloff, J Bergeron, Clinique des maladies Lipidiques de Quebec, Quebec; Y. Pesant, P Chevalier, Recherche Médicale St-Jérôme Inc., St-Jerome; V. Woo, C Hurd, Winnipeg Regional Health Authority, Winnipeg; **Chile:** G. Eggers Ruckert, J I Lira, G Navarro, Hospital Base Valdivia, Valdivia; M. Rodriguez Venegas, P Gonzalez, M García, H Montecinos Hospital Sotero del Rio, Santiago; G. A. Araneda Vidal, M J Fernandez, J P Varas, C Fernandez, J Aguilar, R Marin Hospital Clinico de Magallanes, Punta Arenas; C R Conejeros Kindel, P Yovaniniz, Sociedad Medica Cardiologica El Llano, Santiago; O. Kuzmanic Gherman, M Aravena, Hospital Militar de Santiago, Santiago; J C Palma Carvajal, E Macias, P Corrado, Hospital El Pino, Santiago; M. Opazo Lazcano, B Garrido, G Charne, Hospital Naval Almirante Nef, Viña del Mar; J. Cristobal Celis Carrasco, P Vignolo, S Saavedra., Hospital Padre Alberto Hurtado, Santiago; V. A. Saavedra Gajardo, C Saavedra, D Santamaría, B del Castillo, I Balda, V Zurvarra., CCBR- Santiago, Santiago; **China:** G. Fu, D Jiang, H Huang, M Wang, J Song, W Lu, Sir Run Run Shaw Hospital, Hangzhou; Y. Lin, Z Lu, Y Shi, M

Zhong, The People's Hospital of Guangxi Zhuang Autonomous Region, Nanning; X. Zhao, Di Chen, G Zhang, Y He, P Shi, K Chu, Q Gao, W Deng, H Chen, J Zhang, Beijing Jishuitan Hospital, Beijing; Y. Zhang, H Chen, Z Li, E Liu, Y Xie, R Lin, W Tan, The Third Affiliated Hospital of Guangzhou Medical University, Guangzhou; Z. Yuan, Y Wang, J Ren, H Yu., First Affiliated Hospital of Xi'an Jiaotong University, Xi'an; M. Luo, W Ma, W Shi, H Xu, M Xu, G Liu, Tongji Hospital, Shanghai; Y. Dong, X Dong, B Bai, R Guo, X Liu, Y Gao, S Li, X Xu, P Liu, D Chen, General Hospital of Ningxia Medical University, Yinchuan; X. Dong, S Wang, S Wang, F Fu, Q Jiang, C Meng, X Yin, Y Lu, Y Cui, Jinan Central Hospital, Jinan; G. Su, W Miao, F Wei, Q Zhao, Z Li, X Gao, Jinan Central Hospital, Jinan; **Colombia:** H. Yupanqui Lozano, W Andres Prada, W Javier Figueroa, A Maria Garcia Ordoñez, E Quintero, Dexa Diab Servicios Médicos Limitada, Bogotá; G. Sanchez Vallejo, C Contreras, J Escobar, J P Jopez Alvaran, CEQUIN - Fundación Cardiomet Eje Cafetero, Armenia; L. Garcia Ortiz, M Marin, C Montoya, Centro de Investigaciones Clínicas IPS Cardiomet, Pereira; J. Accini Mendoza, J Santander Rosales Manjarres, B Navarro, IPS Centro Científico Asistencial S.A.S, Barranquilla; G. Aroca Martínez, A A Cadena Bonfanti, X Lastra Perci, L de la Hoz, Clínica de la Costa Ltda., Barranquilla; J. Coronel Arroyo, C P Lenis Rendon, C Garcia, J M Lopez, N Escobar, IPS Centro Médico Julián Coronel S.A., Cali; C. Lenis Rendon, J A Ochoa Franco, Fundacion Reina Isabel, Cali; M. Terront Lozano, C Bazurto Zapata, L S Garcia Ibarra, A M Rodriguez Barrero, A F Sarmiento, Solano y Terront Servicios Médicos Ltda., Bogotá; H. Garcia Lozada, M M Diego Olitte, L E Rengifo Florez, Fundación Centro de Investigaciones Biomédicas Riescard, Espinal; C. Jaramillo Muñoz, G E Nanclares Quintero, G M Correa, S Ruiz, SAS, Medellin; A. Gonzalez Dorado, A Causa, J Lozano, Medplus Medicina Prepagada S.A., Bogotá; E. Arcos Palma, A Morales, Fundacion Centro de Obesidad y Metabolismo – COMETA, Pasto; J. Arteaga, J Beltran, M Granados, A C Rubio, Centro de Atención e Investigación Medica S.A. – CAIMED, Bogotá; F. Trujillo Dada, Wendy Bueno, R Cano Rivera, K Johenis Corredor, V Maria Romero, F Alberto trujillo Accini, J Mario Palmera, Corazon IPS S.A.S., Barranquilla; G. Guzman Ruiz, J Junior Estman Healthy Medical Center S.A.S, Zipaquirá; M. Rivas Ortega, C Elena García, A M Morales Sanchez, Y Beatriz Lora, J Montoya Escobar, J Ignacio Garcia Cano, S Milena Duque, S Mora Thiriez, M Luz Muñoz Castaño, P Andrea Giraldo, Fundacion Centro de Investigacion Clinica CIC, Medellin; **Croatia:** Z. Boljkovac, I Sunic Grcic, General Hospital Karlovac, Karlovac; M. Jandric Balen, S Zukanovic, General Hospital Slavonski Brod, Slavonski Brod; M. Jeric, D Dvorscak, S Car, General Hospital Varazdin, Varazdin; A. Knezevic, D Herceg, B Franov, V Miskovic, General Hospital Zadar, Zadar; M. Bakula, A Hadak, M Superba, Clinical Hospital Sveti Duh, Zagreb; J. Rubes, L Lucinger Special Hospital for medical rehabilitation, Krapinske Toplice; I. Gornik, J Hamzic, University Hospital Centere Zagreb, Zagreb; **Czech Republic:** L. Ballek, L Sedlackova, J Hejlova, Nemocnice Jindrichuv Hradec a.s., Jindrichuv Hradec; D. Galatikova, A Huskova, Revmatologie Bruntal s.r.o., Bruntal; P. Zak, J Pecova Fakultni nemocnice u sv. Anny v Brne, Brno; M. Flekac, M Flekac, M Mraz Vseobecna fakultni nemocnice v Praze, Praha; P. Potuznik, S Palova, P Novak, AESCULAP Ambulance s.r.o., Dolni Brezany; L. Okenka, J Matuska, Diabetologicka ambulance, Hodonin; F. Rohac, K Vondrak, Fakultni nemocnice Kralovske Vinohrady, Praha; P. Reichert, A Shamasna, Krajska zdravotni, a.s. - Nemocnice Teplice, Teplice; J. Skopek, M Lejskova, Thomayerova nemocnice, Fakultni Thomayerova nemocnice s poliklinikou, Praha; M. Jiruska, P Lang, R Podoubsky, J Svobodova, Krajska nemocnice Liberec, a.s., Liberec; R. Cifkova, M Jozifova, A

Krajcoviechova, P Wolfhart, P Sulc, Jbruthans, Thomayerova nemocnice, Praha; E. Silhova, M Cechakova, Fakultni nemocnice Kralovske Vinohrady, Praha; V. Machova, J Balkova, InterKardioML s.r.o., Marianske Lazne; M. Peterka, S Votocek, Nemocnice Slany, Slany; R. Prosecky, H HladkaFakultni nemocnice u sv. Anny v Brne, Brno; M. Valis, P Barton, J Tomek, Poliklinika Chocen, a.s., Chocen; J. Pumpřla, Marketa Axmannova, R Vitaskova, F Sincl, Preventa Med, s.r.o., Olomouc; P. Horanska, B Richter, Interni a diabetologicka ordinace s.r.o., Nachod; E. Malicherova, E Roderova, P Jenickova, ResTrial s.r.o., Praha; **Germany:** B. Winkelmann, C Finger, ClinPhenomics GmbH & Co KG, Frankfurt; G. Klausmann, C LoehrStudienzentrum Aschaffenburg, Aschaffenburg; K. Milek, M Schwabe, Hausarzt- und Diabetologische Schwerpunktpraxis, Hohenmoelsen; N. Weiss, A Mahlmann, S Werth, C Schmidt, Universitaetsklinikum Carl Gustav Carus TU Dresden, Dresden; I. Schoell, M London, E Steidl, K Orban, Neurologische Praxis Dr. Schoell & Kollegen, Bad Homburg; H. Taeschner, S Bonigut, Gemeinschaftspraxis Dr. Taeschner / Dr. Bonigut, Leipzig; I. Schiefke, A Schwittay, EUGASTRO GmbH, Leipzig; O. Kornmann, A Eich, S Franke, IKF Pneumologie GmbH & Co. KG, Frankfurt am Main; **Hungary:** J. Kis, E Szobota, P Danos, E Beke, A Grosz, Obudai Egeszsegugyi Centrum Kft., Budapest; G. Csecsei, J Ferenczy, A Filo, I Ferencz, E Mihaly, T Baranyi, Clinexpert Kft., Budapest; K. Revesz, J Schlezak, Selye Janos Korhaz, Komarom; E. Harcsa, Z Dombroczi, I Kocsis, E Juhasz, Markhot Ferenc Oktatokorhaz es Rendelointezet, Eger; B. Literati-Nagy, E Kulcsar, K Bezzeg, V Kemeny, E Peterfai, B Buday, DRC Gyogyszervizsgalo Kozpont Kft., Balatonfured; K. Keltai, T Balo, Semmelweis Egyetem III.sz. Belgyogyaszati Klinika, Budapest; A. Somogyi, G Nagy, Semmelweis Egyetem, II.sz. Belgyogyaszati Klinika, Budapest; T. Oroszlan, Z Bagosi, Z Bujtor, Zala Megyei Szent Rafael Korhaz, Zalaegerszeg; A. Tabak, V Ferencz, B Domjan, T Tanczer, Semmelweis Egyetem, I.sz. Belgyogyaszati Klinika, Budapest; A. Palinkas, H Karolyi, K Kovacs, I S Csaszar, Non Invaziv Matrix Osztaly, Belgyogyaszat, Hodmezovasarhely; E. Palhegyi, G Engelhalter, Qualiclinic Eu-i Szolg. es Kutatasszervezo Kft, Budapest; R. Horthy, E Vanko, G Szabo, Dr. Kenessey Albert Korhaz-Rendelointezet, Balassagyarmat; G. Sipos, M Szigyarto, N Sebo, Borsod-Abauj-Zemplen Megyei Kozponti Korhaz es Egyetemi Oktatokorhaz, Miskolc; G. Paragh, Noemi Zsiros, R Szentimrei, D Pal, T Kobling, I Szanto, Z Varadi, Debreceni Egyetem, Belgyogyaszati Klinika, Debrecen; L. Bajnok, S Szujo, O Nemes, A Bajnok, E Mezosi, B Bodis, Z Marton, Pecs Tudomanyegyetem, I. sz. Belgyogyaszati Klinika, Pecs; L. Konyves, M Farago, Lausmed Kft., Baja; G. Kiss, Orsolya G. Kiss, E Nagy, Ermellek Egeszsegcentrum, Letavertes; R. Takacs, S Nyitray, G Abraham, K Fehertemplomi, Kuan-Ming Chiu, Szegedi Tudomanyegyetem Szent-Gyorgyi Albert Klinikai Kozpont, I. Belgyogyaszati Klinika, Szeged; L. Deak, E Dezso, Somogy Megyei Kaposi Mor Oktato Korhaz, Diabetologiai Szakambulancia, Kaposvar; **Israel:** D. Deeb, E Karnieli, D Deeb, M Zloczower, R Mahmid, S Zolotov, I Hochberg, Rambam MC, Haifa; M. Elias, L H Goldstein, V Poletaev, W Rock, O Koren, W Saliba, F Wolf, Clalit Health Services, Afula; F. Adawi, A Nimer, Ziv Medical Center, Safed; OI. Mosenzon, I Raz, M Potekhin, A Cahn, Hadassah University Hospital – Ein Kerem, Jerusalem; J. Wainstein, D Feldman, T Yulian, E Zvulunov, H Israel, D Shpitz, I Bar-Or, L Chananashvili, L Irena, H Dessau, A Halabe, Wolfson Medical Center, Holon; V. Vishlitzky, D Nabriski, L Baraf, M Itelman, Meir Medical Center, Kfar-Saba; E. Schiff, N Willner, E Fireman-Klein, V Svistunov, Y Dotan, O Pavlichev, L Saig, Bnei Zion Medical Center, Haifa; A. Bashkin, E Kuyantseva, S Gershkov, M Nodelman, Galilee Medical Center, Nahariya; Y. Arbel, N Bogomolny, E Leshem-Rubinow, M-T Rofe, E Chorin, O

Havkuk, Tel Aviv Sourasky Medical Center, Tel Aviv; J. Wainstein, D Feldman, Herzliya Medical Center, Herzliya; **Japan:** Y. Fujino, H Kitamura, Y Toriumi, H Ishiguro, T Naganuma, S Shu, K Suzuki, Y Hirota, T Hayashi, K Hozawa, Seikeikai New Tokyo Heart Clinic, Matsudo-shi; T. Fukui, Y Abe, K Yamauchi, M Maruyama, S Matsumura, Josuikai Olive Takamatsu Medical Clinic, Takamatsu-shi; R. Kozuma, Y Nagai, Y Kihara, Kitakyushubyoin Kitakyushu General Hospital, Kitakyushu-shi; H. Maeda, K Nakanishi, T Iitsuka, M Hatori, Y Shinozaki, D Akiyama, M Kawabe, JA-Ibaraki Seinan Medical Center Hospital, Sashima-gun; M. Takei, A Sato, Y Kawai, K Kitajima, Nagano Red Cross Hospital, Nagano-shi; M. Ide, N Sato, H Morisaki, K Nakashima, H Takayanagi, H Watanabe, N Iwahashi, Aso Co.,Ltd Iizuka Hospital, Iizuka-shi; M. Tsujimoto, K Hibuse, T Hata, K Ueno, H Tatsuma, Shinshinkai The Veritas Hospital, Kawanishi-shi; Y. Wakida, Takahumi Ito, R Mizuno, H Fujita, N Konishi, T Kanehira, R Watanabe, Daishinkai Ookuma Hospital, Nagoya-shi; H. Miyaoka, T Okada, M Yamamoto, S Okita, H Murakami, Y Todo, F Umeoka, K Hori, K Shiraishi, F Tada, T Shimizu, J Tamai, C Sasaki, Y Okuzima, M Yasuda, Saiseikai Matsuyama Hospital, Matsuyama-shi; Y. Iwaita, K Tanaka, Kokankai Kokan Clinic, Kawasaki-shi; **Republic of Korea:** Seung-Woon Rha, Jin Oh Na, Korea University Guro Hospital, Seoul; Deok-Kyu Cho, Yun-Hyeong Cho, Eui Seock Hwang, Tae Young Choi, Ki-Bum Won, Hong-Bae Kim, Sang-Hwan Kim, Dong-Jin Oh, Jae Hyuk Lee, Hye Min Choi, Hye Soo Chung, Hyung-Bok Park, Yong-sung Suh, Myongji Hospital, Gyeonggi-do; Sin Gon Kim, Hee Young Kim, Yoon Jung Kim, Nam Hoon Kim, SunHwa Kim, Kyeong Jin Kim, Kyoung Jin Kim, Jee Hyun An, Joo Hyung Kim, Korea University Anam Hospital, Seoul; Kyong Soo Park, Soo Heon Kwak, Min Kyeong Kim, Kyeong Seon Park, Yul Hwangbo, Dong-Hwa Lee, A Ram Hong, Lee-Kyung Kim, Kyongyoung Kim, Chang-Myung Oh, Jie Eun Lee, Shinje Moon, Chan-hyeon Jung, Ji Hyun Lee, Ji Myeong Jin, Bae Jae Hyun, Ye Seul Yang, Sung Hye Kong, Seoul National University Hospital, Seoul; Kun Ho Yoon, Hae Kyung Yang, Hun-Sung Kim, The Catholic University of Korea, Seoul; Taek Jong Hong, Jun-Hyok Oh, Jin Sup Park, Hye Won Lee, Jung-Hyun Choi, Jinhee Ahn, Pusan National University Hospital, Busan; Sang-Jin Han, Woo Jung Park, Hyun Sook Kim, Kyung Ha Park, Sang Ho Jo, Sung Ai Kim, Hallym University Sacred Heart Hospital, Gyeonggi-do; Moo Hyun Kim, Jong Sung Park, SungHwan Suh, Won Suk An, Mi Kyoung Park, Young Rak Cho, Dong-A University Hospital, Busan; Young-Hak Kim, JongYoung Lee, Seung-Whan Lee, Asan Medical Center, Seoul; Dong-Soo Kim, Han-Young Jin, Jeong-Sook Seo, Inje University Busan Paik Hospital, Busan; Choon Hee Chung, Jung Soo Lim, Ji Hye Huh, Yonsei University Wonju Severance Christian Hospital, Gangwon-do; Je Byung Park, Seung Hee Yu, Gachon University Gil Medical Center, Incheon; **Malaysia:** N. Zulkarnain Sim, S Shah Firdaus Khan, N I M Albakari, J M Sivaraman, K A A Manaf, I Wan Maharuddin, S V Nagendram, Hospital Tengku Ampuan Rahimah, Klang, Selangor; N. Ali, N A Abdul Latiff, N Ezzean Ezzati Mohd Othman, Siti Norsaadah Md Sarip, E Chew, S Mohamed, Klinik Kesihatan Tampin, Tampin; N. Azizah Aziz, K Chong Hui, L Shueh Lin, S Velaiutham, A Sharifuddin Mohd Khir, Hospital Pulau Pinang Clinical Research Centre, Pulau Pinang; L. Yuan Lee, S Devi / Manikam, K Chiew / Chooi, M Lee / Chang; Hospital Seri Manjung, Seri Manjung; C. Peng Ooi, J Anthony / Anthony, Mitra / C Seganathirajah, Ooi Chuan / Ng, Norzian / Ismail, Medical Department Hospital Serdang, Jalan Puchong; C. W. Kooi Cheah, GR L Ramanathan, Ng Yoke Mui, Fu Kok Wen, Teh Lei Choo, Hospital Taiping, Jalan Stesen, Taiping; A. Irawan Bin Ruhani, S Jamaludin, S Khairani Zainal Abidin, F Saffhan Mohamad' Nor, Hospital Tengku Ampuan Afzan, Kuantan, Pahang; M. Radzi Abu Hassan, N Hanari, N Shahrazal Binti Ahmad,



M Azri Bin Mohd Suan, N Hanim Zainul, S Maisarah binti Md Ali, Hospital Sultanah Bahiyah, Alor Setah, Kedah; C. Kok Han, G Srinivasaiah Sridhar, C Kok Han, A Choon Chin, L Zhen Vin, Clinical Investigation Centre, University Malaya Medical Centre, Lembah Pantai, Kuala Lumpur; K. Abdul Kadir, A Zaini Md Zain, N Asmah Nik Hussain, P Pusparajah, Monash University Sunway Campus, Medical Precint, Clinical Research Centre, Petaling Jaya, Selangor; **Mexico:** F. Flores Lozano, A Cabeza Gómez, E Calarco Zaccari, A Maria Barragan Vigil, C Margarita Anaya Preciado, Hospital Dr. Angel Leaño, Zapopan; M. C. Guerrero de Leon, M Candelaria Fernández Parra, A López Cervantes, E Treviño Aguirre; AVIX Investigación Clínica S.C, Monterrey; E. Pelayo Orozco, S Caballero González, Centro de Investigacion Medica de Occidente, S.C., Zapopan; R. Guadalupe Banda Elizondo, E Santa Rosa Flores, Centro de Estudios Clinicos y Especialidades Medicas, S.C., Monterrey; M. Angel García de León Guerrero, F Jimenez Flores, J Pérez Sanchez, F Liana Pérez, J Salvador Castillo Rodriguez, L Alberto Martínez, D Román Marquez, B Estela Figueroa Gutierrez, M Teresita Escalona Flores, Phylaxis Clinicas Research S. de R.L. de C.V., Cuautitlan Izcalli; M. Aguilera Real, Centro de Investigacion Biomedica y Farmaceutica, S.C., Mexico; P. Fajardo Campos, P Fajardo García, M Arasely Uribe Ríos, E Palomo Romero, Z Reynoso Pérez, Centro de Investigacion Cardiovascular y Metabolica, CINCAME, Tijuana; C. Lopez Tarabay, L david Abraira Muñoz, L Garcia Ibarra, J Jaime Gutierrez Farias, J Garcia Gonzalez, Centro de Investigacion Clinica Chapultepec S.A. de C.V., Morelia, Michoacan; N. Alvarez Palestino, L Arce Sanchez, G M. Avila Carrillo, M Angel Martinez Flores, N Nava Ordoñez, Phytomedicamenta S.A. de C.V., Benito Juarez; C. Medina Pech, M Jesús Arana Andrade, J David Uicab Euan, M Elizabeth Ortegon, S Alicia Zúñiga García, Medical Care & Research SA de CV, Merida; J. Tamayo y Orozco, H de Jesus Alfredo Cacique Vazquez, R Villanueva Herrera, E Karla Vera Perez, A Ponce Arango, Comitè Mexicano Para la Prevencion de Osteoporosis AC, Mexico; M. Odin de los Rios Ibarra, L Gonzales, J de Jesus Rubio Esperano, L Lizet Serrano Quintana, I Salazar, Centro para el Desarrollo de la Medicina y de Asistencia Medica Especializada S.C., Culiacan; L. Nevarez Ruiz, C Agustin Carmona Barron, C Bernardette García Ballesteros, Investigacion En Salud Y Metabolismo S.C., Chihuahua; L. Fernando Flota Cervera, E Antonio Canto Hercilla, H Gomez, Sociedad de Cirugia Vasculat Plastica Reconstructiva de Angiologia y Cardiologia SCP, Merida, Yucatan; J. Villagordoa Mesa, P Aguado Herrera, Centro de Estudios Clínicos de Queretaro S.C., Queretaro; M. Del Pilar Peña Rodriguez, E Orozco, Servicios Medicos de la Peña SC, Guadalajara; R. Gutierrez Ochoa, E Verduzco Mora, Clinstile, S.A. de C.V., Ciudad de Mexico; C. Riojas Charles, R Araujo Silva, Global Trial Research Center S.A. de C.V., Monterrey; J. Sanchez Mijangos, M Angel Guerrero, C Leticia Cuevas Díaz, C Ortíz Zavala, Centro de Atención e Investigación en Factores de Riesgo Cardiovascular Omega S.C., Mexico; P. Frenk Baron, A Rangel Bernal, F Luna Martinez, M Gutierrez Tlapale, Ultimate Medica SA de CV, Mexico; E. Franco Ramirez, A Martinez Basila, R Maria Ceja Munguía, M Uribe Tello, M Angel Guagnelli Martinez, Health Pharma Professional Research S.A. de C.V., Mexico; **Netherlands:** H. Mulder, P van der Graaff, A Nawaz, I Klopping Keller, Rotterdam Research Institute, Rotterdam; M. Schoofs, P Smak-Gregoor, Albert Schweitzer Ziekenhuis, Dordrecht; N. Al-Windy, S Bulut, J de Jong, A Maas, P Schaardenburgh, Gelre Ziekenhuizen Zutphen Cardiology, Zutphen; B. Imholz, J Heijster, ETZ TweeSteden, Waalwijk; K. Hoogenberg, C-J Smit, Martini Ziekenhuis, Groningen; A. Kooy, F Huvers, Bethesda Cardiology Group, Hoogeveen; S. Landewe-Cleuren, M Kars, D van Moorsel, Maastricht University

Medical Center, Maastricht; B. Wolffenbuttel, H Lutgens, E Schutte, R Gansevoort, N Idzerda, Universitair Medisch Centrum Groningen, Groningen; J. Westerink, M Weijmans, J vd Berg, M van Kleef, M Slob, N Jaspers, UMC Utrecht, Utrecht; M. Hovens, H Monajemi, Rijnstate Dept. of Internal Medicine, Arnhem; **Poland:** I. Kobielski-Gembala, W Żmuda, M Adamczyk, Medicome Sp. z o.o., Oswiecim; M. Konieczny, A Strzelecka-Sosik, E Nowacka, I Woźniak, KO-MED M Konieczny Cent. Wielosp. Opieki Amb. z Amb. Osr. Zab., Pulawy; E. Krzyżagórska, Marzenna Sekulska, Praktyka Lekarska Ewa Krzyżagórska, Poznan; B. Kaczmarek, E Czajkowska-Kaczmarek, B Kaczmarek, K Opawska, M Dąbrowska, POLIMEDICA Centrum Badań Profilaktyki i Leczenia, Zgierz; W Kuś, A Wrzesień-Kuś, G Piotrowski, Indywidualna Specjalistyczna Praktyka Lekarska, Lodz; L. Hotłoś, A Ocicka-Kozakiewicz, Jeka Sławomir Niepubliczny Zakład Opieki Zdrowotnej "Nasz Lekarz" Praktyka Grupowa Lekarzy Rodzinnych z Przychodnią Specjalistyczną, Torun; J. Jurowiecki, Poradnia Kardiologiczna Jarosław Jurowiecki, Gdansk; T. Stasińska, J Karczewicz-Janowska, J Jaruga, D Żytkiewicz-Jaruga, E Krupińska, Regionalna Poradnia Diabetologiczna - Żytkiewicz-Jaruga, Stasińska, Spółka Partnerska Lekarzy, Wrocław; D. Pupek-Musialik, P Bogdański, M Szulińska, D Skrypnik, Szpital Kliniczny Przemienienia Panskiego Uniwersytetu Medycznego im. Karola Marcinkowskiego, Poznan; E. Skokowska, M Bojarska-Łoś, M Giermkowska-Samek, M Piróg, Walko Bogdan Niepubliczny Zakład Opieki Zdrowotnej Przychodnia Specjalistyczna "Medica", Lublin; L. Wojnowski, A Jelińska, M Grądzka, A Danyluk, R Łysek, Lecznice Citomed Sp. z o.o., Zespół Przychodni, Torun; T. Śliwińska, A Podrażka-Szczepaniak, M Barney, MCBK Iwona Czajkowska Anna Podrażka-Szczepaniak S.C., Grodzisk Mazowiecki; A. Tomczyk, M Nęcki, NZOZ Centrum Medyczne ProMiMed, Krakow; J. Malicka, M Dudzińska, E Kiszczak-Bochyńska, Centrum Medyczne "Luxmed" Sp. z o.o., Lublin; A. Markiewicz, K Galbas, A Paciorkowski, NSZOZ Medicus (Niepubliczny Specjalistyczny Zakład Opieki Zdrowotnej MEDICUS), Sroda Wielkopolska; S. Mazur, M Mazur, A Chmielowski, A Świątek, B Sobocka, J Wis, Centrum Medyczne Medyk, Rzeszow; M. Jozefowska, M Kaczmarek, M Timler, Z Ciepłucha, Centrum Terapii Współczesnej J.M. Jasnorzewska Spółka Komandytowo-Aukcyjna, Lodz; L. Lazuka, N Łazuka, Prywatny Gabinet Lekarski Lech Lazuka, Parczew; A. Wittek, J Spyra, H Rudzki Indywidualna Specjalistyczna Praktyka Lekarska Dr N Med Andrzej Wittek, Ruda Śląska; H. Jasiel-Wojculewicz, A Stefański, Ł Wierucki, A Hańczuk, M Misiura, K Szmygel, O Kolcowa, E Orłowska-Kunikowska, M Rutkowski, A Ignaszewska-Wyrzykowska, Uniwersyteckie Centrum Kliniczne, Klinika Nadciśnienia Tętniczego i Diabetologii, Gdansk; G. Popena, J Maciejewska, A Mostowy, B\_Serwis Popena Sp.Jawna, Chorzow; M. Wojtecka-Grabka, M-L Grażyna, K Wiesław, K Barbara, Polimedica Centrum Badań, Profilaktyki i Leczenia, Kielce; E. Kramarczuk, C Wojciech, H Jarosław, B Ewa, KO-MED Centra Kliniczne Zamosc, Zamosc; P. Karas, Strzelecka-Sosik Agnieszka, C Hanna, Ś Justyna, K Piotr, KO-MED Centra Kliniczne Lublin II, Lublin; I. Wozniak, W Mateusz, W Katarzyna, F Jacek, J Andrzej, KO-MED Centra Kliniczne Staszow, Staszow; K. Cymerman, M Gmytrasiewicz, Indywidualna Specjalistyczna Praktyka Lekarska w Dziedzinie Kardiologii lek. med. Krzysztof Cymerman, Gdynia; J. Zambrzycki, P Opadczuk, H Krysiak-Kowaluk, RCMed, Sochaczew; K. Klodawska, Z Klszczewski, A Sulich NBR Polska, Warsaw; J. Zieleniewski, P Opadczuk K Urbańska K Faran-Grabowska, RCMed, Nowy Duninow; T. Szczepaniak, A Siegel, A Strzała Kłeczek, K Kincel, D Nowak, L Słowik-Gomułka, G Watemborska-Matuszyk, J Lampart, A Strózik-Kręcichwost, T Dziewit, Centrum Medyczne Pratia Katowice II, Katowice; M. Broncel, J Wójcik-Odyniec, E Jakubczyk, CCBR - Lodz -

PL, Lodz; K. Wierzbicka, A Witowicz, B Jedrych, P Korczyk, M Socik-Pojawa, CCBR/Somed -  
 Warsaw - PL, Warsaw; **Portugal:** P. Monteiro, S Monteiro, P Lázaro Mendes, F Soares, S  
 Lázaro Mendes, L Leite, J Vicente, M Santos, A R Ferreira, P Alves, Coimbra University  
 Hospital, Coimbra; F. Rosário, A Garrão, L Duarte, Hospital da Luz, Lisboa; C. Rogado, R  
 Duarte, T Laginha, P Matos, J Raposo, APDP- Associação Protectora dos Diabeticos de  
 Portugal, Lisboa; J. Mariz, J Teixeira, C Capela, Hospital de Braga, Braga; A. Leitão, R Cardiga,  
 M Alface, S Augusto, L Basto, A Ribeiro Cunha, D Rei, J Dantas, I Verdasca, Centro Hospitalar  
 de Lisboa Ocidental, Lisboa; L. Andrade, A Mafalda Silva, M Elena Suarez, V Paixão Dias, J  
 Silva, M Moreira, N Pereira, M Gonçalves, Centro Hospitalar Vila Nova de Gaia/Espinho, EPE,  
 Vila Nova de Gaia; A. Goncalves, A Silveira, A Sampaio, A Dias, M Diogo, C Vilaça, Hospital  
 CUF Porto, Porto; **Romania:** A. Cif, T Calin, S Mirela Elena, S.C Mediab S.R.L, Tirgu Mures; C.  
 Crisan, S Adina, S N Ramona, S.C Mediab S.R.L, Tirgu Mures; V. Anghel, C Simona, M C  
 Victoria Spitalul Clinic Judetean de Urgenta "Sf. Apostol Andrei" Galati, Galati; L. Turcu, V  
 Mihaela, I.N.D.N.B.M. "Prof. Dr. N.C. Paulescu", parent, Bucuresti; D. Cosma, H Delia Cristina,  
 H Marius-Calina, Pelican Impex SRL, Oradea; G. Negrisanu, M Andreea-Andrada, V Maria-  
 Mihaela S.C Centrul Medical Dr. Negrisanu S.R.L, parent, Timisoara; T. Simona Camelia, P  
 Oana, A Monia, S.C Centrul Medical "Sanatatea Ta" S.R.L, Bucuresti; A. Onaca, O Mircea, S.C  
 Grandmed S.R.L, PARENT, Oradea; A. Mot, N Georgiana Gensan SRL, Policlinica "Astra",  
 parent, Sibiu; V. Stolea, N Elena, CMI Dr. Stolea T. Violeta – Medic specialist diabet zaharat,  
 nutritie si boli metabolice, Bucuresti; D. Barbonta, B Cristian, S Oana, A Ioana, S.C Diana  
 Barbonta S.R.L, parent, Alba Iulia; A. Popescu, M Madalina, S.C. Diabmed Dr. Popescu  
 Alexandrina S.R.L, parent, Ploiesti; A. Coman, C Anca, S Gabriela I.N.D.N.B.M. "Prof. Dr.  
 N.C.Paulescu", Bucuresti; S. Constantinescu, C Mircea, Medcon SRL, Buzau; M. Diaconu-  
 Sotropa, G Ciprian Cabinet Diaconu Sotropa Michaela SRL, Iasi; D. Ene, A Adrian Spitalul  
 Universitar de Urgenta Militar Central "Dr Carol Davila", Bucuresti; E. Pintilei, G Mihai, R  
 Pintilei Delia, S.C Consultmed S.R.L, parent, Iasi; I. Toarba, H Simona, Spitalul Clinic "Dr.  
 C.I.Parhon", Cabinet Diabet, Iasi; D. Negru, Ferdinica- Loredana Flaminzeanu, C Iulian, C Ana  
 Maria-Cristina, Clinica Medicala Data Plus SRL, Bucuresti; R Doros, S Gabriela Cleo, B Sorin,  
 I.N.D.N.B.M. "Prof. Dr. N.C. Paulescu", Bucuresti; L. Demian, S Mihai, B Raul, A Ioana, S.C  
 Anamed S.R.L, parent, Oradea; A. Nicolau, P Mihai Cosmin, G Isabela, C Elena, T Ileana, S.C  
 Policlinica CCBR S.R.L, parent, Bucuresti; **Russian Federation:** E. Valuyskikh, E  
 Mirosnichenko, N Klementyeva, O Zelman, FSBSI "Scientific and Research Institute of  
 Physiology and Basic Medicine", Novosibirsk; G. Chumakova, A Vigel, N Leonova, Y Pergaeva,  
 O Stefanovskaya, S Pushkareva, L Antoshkina, N Zheleznova, Iveitsman, SBEI HPE Altai  
 State Medical University of MoH and SD, Barnaul; O. Barbarash, T Zvereva, E Zhuravleva, I  
 Zavyrylina, E Usoltceva, Y Savostyanova, T Kupriyanova, K Krivoshapova, N Kondyukova, A  
 Inozemceva, Y Argunova, FSBI "Scientific-research Institute for Complex Problems of  
 cardiovascular disease", Kemerovo; L. Tsyba, D Belenky, O Mariich, A Terekhova, O  
 Tsygankova, SBIH of Novosibirsk Region "Clinical Emergency Hospital #2", Department of  
 Surgery, Novosibirsk; G. Nagibovich, E Kuznetsova, G Nagibovich, Y Ivchenko FSBMEI HPE  
 "Military Medical Academy n.a. S.M. Kirov" of the MoD of the RF, Saint-Petersburg; V.  
 Dobronravov, A Dobronravov, M Bush, I Trofimenko, Pavlov First Saint Petersburg State  
 Medical University, Saint-Petersburg; A. Vishnevsky, V Zikov, D Kositsyn, SPb SBIH "City  
 Pokrovskaya Hospital", Saint-Petersburg; Z. Palzman, T Spiridonova, N Rodina, S

Polozhentsev, L Mamedova, Medical Research Institute at Krestovskiy, St. Petersburg; A. Panov, I Abesadze, M Alugishvili, North-West Federal Medical Research Center n.a. V.A. Almazov, Saint-Petersburg; V. Ivashkin, O Drapkina, O Korneeva, E Zyatenkova, FSAEI HE " First Moscow State Medical University n.a. I.M. Sechenov" of the MoH of the RF, Moscow; I. Glinkina, I Glinkina, I Poluboyarinova, O Gurova, A Raykhman, FSAEI HE " First Moscow State Medical University n.a. I.M. Sechenov" of the MoH of the RF, Moscow; A. Vertkin, Avertkin, I Rodykova, K Shamaeva, T Petrovskaya, E Uzueva, SBEI HPE "Moscow State Medical and Dentistry University n.a. A. I. Evdokimov" of the MoH of the RF, Moscow; Y. Milovanov, Y Milovanov, S Milovanova, L Milovanova, M Markina, I Dobrosmyslov, FSAEI HE " First Moscow State Medical University n.a. I.M. Sechenov" of the MoH of the RF, Moscow; V. Markov, S Afanasiev, E Babich, N Belokopytova, S Demyanov, A Maximov, I Maximov, T Rebrova, M Shtatolkina, FSBI "Research Institute for Cardiology" of Siberian Branch RAMS, Tomsk; A. Masin, A Demko, O Chuyko, A Pronina, G Charf, NSIH "Departmental Hospital on Station Kemerovo of OJSC "Russian Railways", Kemerovo; E. Akatova, E Akatova, I Urlaeva, O Nikolin SBEI HPE "Moscow State Medical and Dentistry University n.a. A. I. Evdokimov" of the MoH of the RF, Moscow; Y. Khovaeva, L Ermachkova, E Burdina, SBIH of Perm territory " City Clinical Hospital # 2 n.a. Fedor Khristoforovich Gral", Perm; I. Suchkov, P Shvalb, I Suchkov, A Pshennikov, S Gryaznov, SBI of Ryazan region "Regional Clinical Cardiological Dispensary" Ryazan; O. Rymar, Y Dolinskaya, Y Bahareva, S Mustafina, L Sherbakova, A Ovsyannikova, FSBSI "Scientific Research Institute of Therapy and Preventive Medicine", Novosibirsk; O. Bolshakova, E Polunicheva, S Dora, Pavlov First Saint Petersburg State Medical University, Saint-Petersburg; A. Agafyina, A Yashina, I Vasileva, SPb SBIH "City Hospital # 40 of Kurortnyi region", Sestroretsk; P. Yakhontova, S Selivanova, O Kargapol'tseva, N Shilina, G Bayramova, I Sorokin, SBIH of Novosibirsk region " Novosibirsk Regional Clinical Cardiological Dispensary", Novosibirsk; K. Astamirova, P Kuchuk, D Koniushenko, SPb SBHI "City Polyclinic #74", Saint-Petersburg; N. Malykh, M Dvorkin, T Krovelets, K Konovalova, BIH of OR "City Hospital # 2", Omsk; **South Africa:** M. Seeber, F van Niekerk, Medi-Clinic Heart Hospital, Pretoria; H. Siebert, W Steenkamp, S Wiid, M Noeth, R Siebert, Into Research, Pretoria; J. Breedt, J Bouwer, Emmed Research, Pretoria; C. Kapp, TP Venter, Cardiology Clinical Research, Alberton; B. Rayner, Y Trinder, Groote Schuur Hospital E13 Renal Unit, Cape Town; P. Rheeder, E Delport, S Mathijs, P Soma, D van Zyl, M Strydom, A Marais, University of Pretoria Clinical Research Unit, Pretoria; A. Badat, S Hansa, D Fourie, TE Walton, Wits Clinical Research, Chris Hani Baragwanath Hospital, Johannesburg; J. Engelbrecht, J Jansen, J Roos, Dr JM Engelbrecht Practice, Cape Town; S. du Toit, K Lehloeny Tread Research, Tygerberg hospital, Cape Town; L. van Zyl, FH van Zyl, M Naude, Clinical Projects Research SA (Pty) Ltd, Worcester; M. Mookadam, A van der merwe, J Trokis, Langeberg Clinical Trials, Cape Town; L. Lombard, K Coetzee, Cape Town Medical Research Centre, Cape Town; S. Ismail, HH Bruning, Ismail, SM Gatesville Medical Centre, Cape Town; G. Latiff, O Yasmin, Latiff GHVM, Durban; T. Pillay, Z Mohamed, S Dawood, Dr Dawood, Mohamed and Pillay, Cape Town; A. Stapelberg, L Van Zyl, P Abrahams, Syzygy Clinical Research Services, Pretoria; J. Jurgens, P van Heerden, E Swart, C Jacobus Botha, DJW Research, Krugersdorp; J. Meeding, S Hansa, A Colleen Hemus, Wits Clinical Research, Johannesburg; W. Oosthuysen, G Jacobus Visagie, Limaro Research, Bloemfontein; N. Fourie, P Alexander Hutton, N Daniel van der Merwe, Iatros International, Bloemfontein; N. Chelin, T C Everton, Londisizwe Research Centre, Durban; M. Duki, N M

Ghila, Dr M Duki Research and Trial Site, Verulam; M. Joshi, M Hira, Diabetes Care Centre & CDE Centre, Johannesburg; **Spain:** F. Tinahones Madueno, B Martinez, N Sebastian, Dr Paloma Romero Hospital Clinico Universitario Virgen de la Victoria, Malaga; L. Asmarats Mercadal, S Calzado Isbert, I Diaz Gonzalez, J Masso Asencio, M Jose Covas Figueras, G Cuatrecasas Cambra, CAP Sardenya, Barcelona; M. Rivas, H Garcia, Hospital Infanta Luisa, Sevilla; A. Roca Fusalba, D Geat, G Cuatrecasas Cambra, J Abadal Sastre, CAP Sarria, Barcelona; F. Cereto Castro, A Carrasco Mas, Hospital Quiron Barcelona, Barcelona; C. Morales Portillo, I Serrano, Hospital Universitario Virgen Macarena, Sevilla; S. Valdes Hernandez, F Linares Fajardo, Hospital Regional Universitario de Malaga, Málaga; C. Sanchez Juan, J Carlos Ferrer, Hospital General Universitario de Valencia, Valencia; F. Gomez Peralta, C Abreu Padin, Complejo Asistencial de Segovia, Segovia; D. Mauricio, B Soldevilla Madorell, F Vazquez San Miguel, N Alonso Pedrol, A Maria Barriocanal Hospital Universitari Germans Trias i Pujol, Badalona; C. Trescoli, C Fajardo Montañana, Hospital Universitario de La Ribera, Alzira; M. Angeles Gonzalo, J Ignacio Lara Capellan, A Estrella, C Vazquez Martinez, I Gonzalo Montesinos, A Rovira Loscos, Fundacion Jimenez Diaz, Madrid; J. Blanco Coronado, Hospital Virgen del Mar, Almeria; J. Pantoja Perez, B Vizcaino Castillo, C Castro Alonso, V Escudero Quesada, J Luis Gorriz Teruel, Hospital Universitario Dr. Peset, Valencia; S. Narejos Pérez Centre d'Atencio Primaria Centelles, Centelles; M. Geraldia Lama, E Garcia del Río, Hospital Universitario Virgen de las Montañas, Villamartin; **Ukraine:** T. Zlova, K. Ponomarenko, O. Karpenko, S. Bezuglova, L. Mitskevych, S. Kizim, I. Nevolina, Kyiv City Clinical Hospital #1, Kyiv; V. Katerenchuk, B. Liudmyla, K. Ivan, M.V. Sklifosovskyi PRCH, Department of Endocrinology UMSA, Poltava; I. Rudyk, M. Olena, I. Anna, B. Ganna, GI L.T.Malaya Therapy National Institute of the NAMS of Ukraine, Kharkiv; I. Topchii, P. Semenovykh, Y. Yulia, GI L.T.Malaya Therapy National Institute of the NAMS of Ukraine, Kharkiv; G. Mykhalchyshyn, D. Kirienko, N. Kobiliak, Dr. Bodnar, Dr. Mykhalchyshyn, KCCC of Endocrinology, Department of General Endocrine Pathology O. O. Bogomolets NMU, Kyiv; N Pertseva, G Olena, Communal institution City Clinical Hospital #9, Department of Endocrinology, Dnipro; H Tomashkevych, Y Mostovoy, N Pentiuk Medical Center Pulse, Department of Therapy, Vinnytsia; V Korpachev, O Prybyla, M Tronko, A Kovalchuk, N Kushnarova, O Zynych, SI V.P. Komisarenko Institute of E&M of NAMSU, Kyiv; V Tseluyko, Z Andriy, R Olga, CI of Healthcare Kharkiv CCH #8 Department of Therapy Kharkiv MA of PGE of MOHU, Kharkiv; B Mankovskyy, N Zherdova, O Lykshapko, P Logoida, MSR SJSHC Artem P.L. Shupyk NMA of PGE, Kyiv; O Godlevska, V Olena, C Olga, CIPH Prof. O.I. Meshchaninov Kharkiv CCH of A&E Medical Care Therapeutic Department #1 Kharkiv MA of PGE, Kharkiv; O Gyrina, O Alifer, K Dozhuk, V Pekhenko, N Gorobets, A Korneichuk, E Makarenko, LLC Treatment and Diagnostic Center Adonis Plus, Kyiv; L Martynyuk, L Martynuyk, O Martynuyk, CI of TRC Ternopil UH, Department of Endocrinology, Ternopil; M Stanislavchuk, P Larysa. S Natalia, Vinnytsia M.I. Pyrogov RCH Department of Cardiology Vinnytsia M.I. Pyrogov NMU, Vinnytsia; V Botsyurko, I Kostitska, O Dzeman, Regional CH Department of Endocrinology SHEI Ivano-Frankivsk NMU, Ivano-Frankivsk; Y Ablitsov, S Ivaseiko, O Konovart, S Sandurska, Y Vendzilovych, Lviv Regional State Treatment – Diagnostic Endocrinological Center, Lviv; O Samoylov, C Iryna, L Rozhkivska, I Ulyanchenko, V Kateryna, SI National Scientific Centre of Radiation Medicine of NAMSU, Kyiv; V Orlenko, K Ivaskina, M Tronko, K Tronko, SI V.P. Komisarenko Institute of Endocrinology and Metabolism of NAMSU, Kyiv; N Pashkovska, N Stankova, RCI Chernivtsi

Regional Endocrinological Center Department of Policlinic Bukovinian SMU, Chernivtsi; L Vynnychenko, N Bolotnikova, N Demokhova, CI Sumy City Clinical Hospital #1 Department of Therapy Sumy SU Med Inst, Sumy; D Reshotko, A Popova, Dr Bogdana, S Tetiana, D Svitlana, R Oksana, Kjiv City Oleksandrivska Clinical Hospital, Kyiv; M Vlasenko, S Litvinova, I Semenyuk, O Fishchuk, Vinnytsia RC Highly Special.Endocr.Center Department of Therapy #2, Vinnytsia; Y Mostovoy, T Tkachenko, M Ovcharuk, L Rasputina, Medical Center Pulse, Department of Therapy, Vinnytsia; I Vakaliuk. N Tymochko, I Drapchak, L Petrovska, CI Ivano-Frankivsk Reg CI Card Center Department of Chronic Ischemic Heart Dis SHEI Ivano-Frank NMU, Ivano-Frankivsk; **Taiwan:** Wen-Ter Lai, Hsueh-Wei Yen, Ye-Hsu Lu, Wen-Chol Voon, Tsung-Hsien Lin, Kai-Hung Cheng, Cheng-An Chiu, Chun-Yuan Chu, Chih-Sheng Chu, Po-Chao Hsu, Kaohsiung Medical University Chung-Ho Memorial Hospital, Kaohsiung; Chern-En Chiang, Yi-Chun Li, Chin-Sung Kuo, Shing-Jong Lin, Liang-Yu Lin, Tze-Fan Chao, Wen-Chung Yu, Shih-Hsien Sung, Kang-Ling Wang, Tse-Min Lu, Kuang-Chung Shih, Taipei Veterans General Hospital, Taipei; Cho-Kai Wu, Fu-Tien Chiang, Juey-Jen Hwang, Chia-Ti Tsai, Jyh-Ming Juang, Dr Lian-Yu Lin, Jiann-Shing Jeng, Sung-Chun Tang, National Taiwan University Hospital, Taipei; Chi-Cheng Lai, Hung-Ru Huang, Chin-Chang Cheng, Kaohsiung Veterans General Hospital, Kaohsiung; I-Chang Hsieh, Ming-Jer Hsieh, Chun-Chi Chen, Cheng-Hung Lee, Chang Gung Memorial Hospital, Linkou, Taoyuan County; Pei-Ying Pai, Po-Yen Ko, Tzu-Yuan Wang, Tien-En Chen, Hung-Pin Wu, Shih-Sheng Chang, Ke-Wei Chen, Yen-Nien Lin, Li-Chuan Hsieh, Che-Yi Chou, China Medical University Hospital, Taichung; Ju-Ying Jiang, Hua-Fen Chen, Ming-Tsang Lee, Jih-Hsin Huang, Jer-Shen Chen, Kuan-Ming Chiu, Far Eastern Memorial Hospital, New Taipei City; Liang-Miin Tsai, Ju-Yi Chen, Cheng-Han Lee, Po-Sheng Chen, National Cheng Kung University Hospital, Tainan; **United Kingdom:** M Saxena, D Collier, Barts Hospital, Centre for Diabetes & Metabolic Medicine 1, London; B Vaidya, S Harman, M Ramell, Royal Devon and Exeter Hospital (Wonford), The MacLeod Diabetes & Endocrine Centre (MDEC), Exeter; M Davies, S Chatterjee, L Meakin, M Quinn, Leicester General Hospital, Leicester Diabetes Centre, Leicester; S Bain, A Mallipedhi, T Min, J Bashir, Morrison Hospital, Department of Endocrinology, Swansea; M Blagden, J Ali, Ashgate Medical Practice, Chesterfield; R McCrimmon, G Brennan, E Malcolm, R McCrimmon, D McDonald, E Pearson, G Illsley, Ninewells Hospital, Department of Endocrinology, Dundee; K Darzy, P Winocour, Queen Elizabeth II Hospital, Department of Diabetic Medicine, Welwyn Garden City; W Hanif, P Cockwell, M Charlton, Queen Elizabeth Hospital, Department of Endocrinology, Birmingham; S Thekkepat, I Howat, M Devers, Monklands Hospital, David Matthews Diabetes Centre, Airdrie; J Patrick, N Wyatt, C Smith, Bradford on Avon Health Centre, Bradford-on-Avon; B Singh, J Nicholas, S Gillani, New Cross Hospital, Department of Diabetic Medicine, Wolverhampton; F Green, E Bell, Dumfries and Galloway Royal Infirmary, Department of Endocrinology/Diabetes, Dumfries; J Boyle, S MacKin, R Livingstone, Glasgow Royal Infirmary, Diabetic Centre, Glasgow; **USA:** A Arif, M Syed, J Hammoud, AA MRC LLC Ahmed Arif Medical Research Center, Flint MI; J Sparks, M Anderson, R Tumey, Kernodle Clinic, Inc., Dept. of the Private Diagnostic Clinic, PLLC, Burlington NC; J Condit, M Reddy, American Health Network of Indiana, LLC, Muncie IN; M Abalos-Galito, J Rebecca, Trinitas Research, Inc., San Jose CA; T Barker, BL.Seaton, ES. Campbell, HC Kompanik, LV Jayson, Research Institute of the Carolinas, PLC, Mooresville, NC; C Huffman, M Bialow, G F. McDonnell, J Kerr McCaffrey, C Anne Manis, E A DeLuca, Meridien Research, Inc., St Petersburg, Tampa FL; J

Levins, M Bartlett, K Anorga, M Franco, P Gentry, D Hodge, R Pohil, Rschultz, MCA Research – Partner, Houston, TX; R Leggett, L Blair, J Gisler, F Niegos, M Osburn, K Parma, S Schendel, L Stines, M Winnie, Crossroads Clinical Research, LLC, Victoria, TX; P Wu, J Canales, J Yu, Kaiser Permanente - San Diego, Bonita, CA; G Cornett, J Beavins, D Hyde, D Zapinski, T Johnson, American Health Network of Indiana, LLC, Franklin, IN; D Levinson, A Ahmed, B Kenny, A Kuehl, Apex Medical Research, AMR, Inc., Chicago, IL; C Bates, C M. Jantzi, P D. Ananthula, J G. Shafer, J D. Louthan, A Renee Bays, A N. Stapleton, P T. Staton, D L. Strum, P Taylor, C Bates, A N. Smith, Holston Medical Group, Bristol, TN; R Rapp, S Bao, C Randolph, Little Rock Diagnostic Clinic, PA, Little Rock, AR; B MacGillivray, R Schuster, T Harden, C Barnella, T Dunnam, DCT-Stone Oak, LLC dba Discovery Clinical Trials, San Antonio, TX; R Whiles, C Bolick, A Brockmyre, S Plucker, C Marshall, C Poteet, D Morin, Holston Medical Group, P.C., Bristol, TN; E Tavel, N Averill, A McFann, D Purcell, Clinical Trials of South Carolina, Charleston, SC; T Dixon, Dr Ericksen Corey, T Dixon, J Goss, R Drescher, Ericksen Research & Development, LLC, Clinton, UT; M Irfan, M Naeem, DM Clinical Research, Tomball, TX; R Egelhof, P Mehta, T Koehler, Heartland Research Associates, LLC, Wichita, KS; J Walia, J Alea Fernandez, G Bedel, R Preet, Mount Sinai - PRIME, Linden, NJ; S Bhuchar, J M. Arroyo, F Ahmed, Pioneer Research Solutions, Inc., Sugar Land, TX; D Onyema, Dr Albert Benchabbat, Leon Kohanbash, Bushwick TMO, Brooklyn, NY; P Miller, M Lalinde, E Carrithers, R Patterson, A Raube-Miceli, A Martinez, Colorado Center for Bone Research, P.C., Golden, CO; B Harris, R M. Levy, E Daniel Siev, B David Harris, H F. Berlin M DiMattia, Integrative Research Associates, Fort Lauderdale, FL; D Sugimoto; J Dugas, Cedar Crosse Research Center, Chicago, IL; M Benson, R Stegemoller, M Schmoll, American Health Network of Indiana, LLC, Avon, IN; S Kinnaman, T O'Connor, T Powel, American Health Network of Indiana, LLC, Greenfield, IN; L Rudolph, M Lewiecki, E Best, J Chavez, M Garcia, New Mexico Clinical Research & Osteo Center, Albuquerque, NM; R Cohen, D Colman, M Ocampo, L Vance/Heaney, G Rappley, I Quezada, Cohen Medical Research Associates, LLC, Delray Beach, FL; V Santos, A Nikfarjam, M Reyes, R Bardinas Rodriguez, L S. Josephs, R Hernandez, P Flores, L Espinoza, W Mejia, Z Pedraza, R Castaneda, Sanitas Research, Miami, FL; J Laguerre, R.B. Cook, R.P Patel, H.R. Werner, R.C Blank, S.H Small, Novant Health Southern Piedmont Primary Care, Monroe, NC; James Andersen, D Holmes, M Farmer, Vikki Wiener, Meridien Research, Brooksville, Lakeland, FL; W Pharr, B Bray, J Beekman, A Anderson, Medication Management, LLC, Greensboro, NC; N Andrawis, N Gabra, T Moche, Susan Marty, Manassas Clinical Research Center, Manassas, VA; O Galvez, P Kishore, Prestige Clinical Research Center, Inc., Miami, FL; R Reyes, R K. Garcia, G De Jesus Lerma, B Pliquin, DM Clinical Research, San Antonio, TX; R Mayfield, Nancy Durham, R Phillips, A Baran, N Kondo, S Dempsey, Jr, W Kufs, T Laddis, K Zimmer, M Van dePol, L Dweck, M Kestler, N Werner, Mountain View Clinical Research, Greer, SC; A Quick, M. J Ashraf, A Quick, G Schallert, M. J Ashraf, Truman Medical Centers Inc., Kansas City, MO; T Sligh, E Gejer, Providence Clinical Research, North Hollywood, CA; P Trueba, J V Batista, P F. Trueba, T Martinez, J Batista, Future Care Solution, LLC, Miami, FL; J Moya, V Amarales, E Elizalde Santos, P A Torres, T Lopez Diaz,

J A. Diaz, Direct Helpers Medical Center, Hialeah FL; I Hodish, T Else, E Buras, A Moratis, University of Michigan, Ann Arbor MI; S Valika, A Rahman, W Malalis, Associates in

Endocrinology, Elgin IL; E Jane Herron Box, P Box, B Kerwood, J Nagaeva, C Metz, J Hinnant, D Griswell, A Philbeck, DJL Clinical Research, PLLC, Charlotte NC; R Dukkipati, R Shaarawy, R Patak, Northridge Clinical Research Inc., Northridge CA; W Kaye, J Steinsapir, B Horowitz, Metabolic Research Institute, Inc., West Palm Beach, FL; M Denenberg, Caroline B. Reynolds, M Jenkinsdr, A Adlakha, Hy Hicklin, J Peelman, Clinical Research of Rock Hill, Rock Hill SC; S Lerman, S D. Lamkin, Jellinger and Lerman, MD, PA dba The Center for Diabetes and Endocrine Care, Fort Lauderdale FL; S Smith, G Gould, Burke Primary Care, Morganton NC; D Cheung, Z Stephen, T Leigh, Long Beach Center for Clinical Research, Long Beach CA; P Norwood, F Chelsea, Valley Research, Fresno CA; R Trejo, K Neolms, R Bache, A J. Dinnerstein, Helix Biomedics, Boynton Beach FL; R Sachson, S Aronoff, A Mendez, S Brooks, L Jones, G Martinez, S Dorfman, J Schill, Leuck, A Miklius, Research Institute of Dallas, P.A., Dallas TX; M Bialow, K Maw, J Andersen, J Hahn, Meridien Research, Spring Hill FL; L Gamarra, Coastal Medical Research Group, Inc, Los Osos CA; R Buynak, M Smith, J Ames, P Volom, Buynak Clinical Research, Valparaiso IN; R Anderson, C V. Desouza, V Shivaswamy, VA Medical Center – Omaha, Omaha NE; G Lefebvre, M Bialow, L Schweppe, M Farmer, Meridien Research, Inc., St. Petersburg FL; R Berenguer, R Nelson, Florida Medical Center & Research Inc, Miami FL; L Mas, N Gonzalez, J M. Palacio, Unlimited Medical Research, LLC, Miami FL; A Bartkowiak, J L. Dilling, T L. Jordan, J A. Geishausser, Blair Medical Associates, Altoona PA; R Jordan, E J Arias, Center for Clinical Trials of Sacramento, Inc., Sacramento CA; C Griffin, M A. Fisher, C A. Bryant, W M. Schnitz, W Kipgen, Lynn Health Science Institute, Oklahoma City OK; C Ramos, A+ Research Inc., Miami FL; J Kasper, R Lopez, E Wright, Focus Clinical Research, Draper UT; J Thomas, MUSC, Dermatology - MSC 578, Charleston SC; D Weinstein, G J. Emerick, R Mendelson, K Aqua, J Lafaille, ZASA Clinical Research, Boynton Beach, FL; G Seco, G Garcia, M Cubillas, Homestead Associates in Research Inc, Homestead FL; J de Souza, A Schneider, J Tjaden, Glacier View Research Institute-Endocrinology, Kalispell, MT; G Goswami, U Schubart, P Kishore, Jacobi Medical Center PRIME, Bronx NY; W Bravo, J Guerrero, M Bertoli-Avella, C Reyes, Clinical Research of Miami, Miami FL; N Gabra, N Andrawis, Burke Internal Medicine & Research, Burke VA; M Dominguez, S Ramos, Health Texas Research Institute, San Antonio TX; A Columbie, P A. Ares-Romero, J Hechavarria, M Villaverde, A Columbie, School of Clinical Research Inc., North Miami Beach FL; N Doyle, T Sherrod, Natalie A Doyle, M.D., P.A., Wilson NC; K Krishnaswamy, S Aamir, P Giddaluri, S Guevara, P Kazmi, P Thomas, Sealy Urgent Care & Medical Center, Sealy TX; L Popeil, D A Albright, Magnolia Research Group, Inc., Ocala FL; S Pimentel, E Mould, West Memorial Family Practice, Katy TX; M Cox, T Alderson, J Conrow, Cotton-O'Neil Clinical Research Center, Topeka, KS; J Sandberg, S Raam, B Suresh, J Lafave, T Lorenz, Oakland Medical Research Center, Troy MI; J Johnston, S S. Fereidouni, A Mahadevan, R F. West, A Dominic Nelson, K Scott, Arrowhead Family Health Center, Glendale AZ; S Ansari, B Khan, A Rastogi, Longwood Research, Huntsville AL; F Saumell, G Gonzalez, E Torres, R B Rodriguez Elias, Universal Clinical Research, Hialeah FL; T Hart, Terence T. Hart, MD, Tusculumbia AL; J Lozano, G Gudavilla, J Suarez, Regenerate Clinical Trials, Miami FL; V Savin, A Khan, T Wiegmann, A Goel, M Gomes, Kansas City VA Medical Center, Kansas City MO; M Fernandez-Gonzalez, F Gustavo, C Ivan, Clintex Research Group, Miami FL; R Chiong, S N. Llerena, M A. Jimenez, Kendall South Medical Center, Inc, Miami FL; D Oram, D George, J Lewis, J Kiefer, A Dollman, L Edje, ProMedica Health System, Inc., Toledo OH; M Fernandez, F Pastor, Center for Clinical



Trials of San Gabriel, West Covina CA; D Kandath, R Phillips, A Baran, N Kondo, S Dempsey, Jr, W Kufs, T Laddis, K Zimmer, M Van dePol, L Dweck, M Kestler, N Werner, Saratoga Clinical Research, LLC, Saratoga Springs NY; D Lorch, A Graves, R Powell, T Hooker, S Shah, N Gomez, PAB Clinical Research, Brandon FL; F Miranda, J Rosales, P Flores, L Espinoza, I Bayona, Y Gomez, J Rodriguez, C Montoya, R Guedes, Y Rodriguez, Y Rodriguez, New Horizon Research Center, Inc, Miami FL; J Wahlen, W Jonathan, H Spencer, W Michael, Advanced Research Institute, Ogden UT; U Kumar, Dr Kanakadurga Govindariju, Dr Sandra Ordonez, Dr Heather Aguirre, Dr Paulgun Sulur, Dr Nikhil Agarwal, L Peters, B Kaviani, DCT-AACT, LLC dba Discovery Clinical Trials, Austin TX; O Fomenko, A Firek, W Loreen, F Ronald, F Olha, VA Loma Linda Healthcare System, Loma Linda CA; J Parrillo, R Henry Janovitz, R Hutchinson, E F Delgado, A Ashley, S Robinson, Family Medical Center, Orlando FL; K Barbel-Johnson, L Timothy, C William, Care Partners Clinical Research, LLC, Jacksonville FL; A Al-Karadsheh, L M Hooper, J Suarez, D Perez, V Guerrero, D Tung, C Loo, K Sodolak, C Michaelis, The Endocrine Center, Ltd, LLP, Houston TX; R Jackson, D Covington, Dominion Medical Associates, Inc., Richmond VA; J Wise, T Huy Vu Tran, T Messina, Diabetes and Metabolism Associates APMC, Metairie LA; D T Torres, J Falcone, M Baretella, K Patel, A Ribo, T Mattews, D Amendolare, J N. McGeehan, Peninsula Research, Inc., Ormond Beach FL; C Corder, C S Black, COR Clinical Research L.L.C., Oklahoma City OK; S Hearne, C Bounds, J Cinderella, J Etherton, S Kiem, M Truth, Delmarva Heart Research Foundation, Inc., Salisbury MD; B Burke, V Tivikaran, S Howard, C Miller, H Neff, Dayton VA Medical Center, Dayton OH; J Thomas, Dr Jeffrey Giullian, South Denver Nephrology, Denver CO; J McRae, D Surratt, J Phillips, Bainbridge Medical Associates, Bainbridge GA; J Kretchmar, M Valdes, J A Cruz, E Navarro, R Garcia, Tellus Clinical Research, Inc., Miami FL, A Zewail, Tai-Chi-Kwo, Norton Community Care, Norton OH; J Stevens, S Diane, T Kim, L Gregory, S Neal, S William, Medical Frontiers, LLC, Carlisle OH; R Sangrigoli, E Gejer, Doylestown Health Cardiology, Doylestown PA; S Stoller, D Jeffrey, S Colar, W Kenneth, Tri-County Research, Inc., Sterling Heights MI; N Farris, S Mooney, The Research Group of Lexington, LLC, Lexington KY; A Jamal, B Nitin, R Syed, Y Andrew, W Christopher, R Abid, G Claudio, M Mojtaba, R Amna, B Michael, T Vincent, North America Research Institute, San Dimas CA; R Cherlin, Richard S. Cherlin, MD, Los Gatos CA; R Ashton, K Pudi, W Julian, K Stephen, A Ronald, Upstate Pharmaceutical Research, Greenville SC; J Frias, S Kelly, S Hsia, National Research Institute, Los Angeles CA; P Clemens, H Cara, Paramount Medical Care, Ogden UT; B Farley, L H. Raible, O Oliveros, H Hafeez, P Pecci, S Bagga-Malhotra, R Reza, M Ahsen Jamal, M Mulgado, Novo Research, Inc., Modesto CA; A Guevara, M Vela, H Ochoa, T Melliza, G Pena, Rockwood Medical Clinic, Bedford TX; S Awua-Larbi, M Shafi, T Alausa, Kidney Care Center, Joliet IL; S Polster, J Earl, PMG Research of Hickory, LLC, Hickory NC; R McNeill, C Farrington, PMG Research of Salisbury, LLC, Salisbury NC; K Carr, M Nabat, S Matthew, E Yvette, Carr Cardiology, Kenneth W. Carr, MD, Oceanside CA; J Earl, S Polster, PMG Research of Hickory, LLC, Hickory NC; Y Handelsman, S Delkhah, Metabolic Institute of America, Tarzana CA; Y Ismail, C Janna, Scottsboro Quick Care Clinic, Scottsboro AL; A Akhtar, A Neiman, Texas Family Geriatric Clinic, Houston, TX; S Blumenthal, V Colleen, D Schmidt, E-M Ashraf, Zablocki VA Medical Center, Milwaukee WI; A Bhargava, T Khoo, C Langel, P Theuma, D Wright, K Fitzgerald, Iowa Diabetes and Endocrinology Research Center, PLC, West Des Moines IA; J Hitchcock, E Capasso-Gulve, E Wolff, Belleville Family Medical Associates LTD, Belleville IL; G Umpierrez, V

Priyathama, P Francisco, S Dawn, Emory University, Atlanta GA; A Quraishi, B Howard Kahn, F J. Ferro, B Bondy Hertz, J E. Phelps, A Campbell, J-M Downing, Overlea Personal Physicians, Baltimore MD; D Pangtay, S Pangatay, K Villagran-Solis, M Haseeb, K Rettig, R Kwan, Medical & Surgical Clinic, Irving TX; R Cox, V Slimak; A So, Break Through Medical Research, Irving TX; J Schmedtje, Roanoke Heart Institute, Roanoke VA; A Chang, Z Douglas, John Muir Physician Network Clinical Research Center, Concord CA; W McGarity, J Jestel, McGarity, Jr., William C., Decatur GA; P Kanade, J Julie, R Asher, Platte River Nephrology, North Platte NE; Y Canaan, A Perez, I Alonso, J Frias, Jesscan Medical Research, Miami FL; R Cutchin, A Koser, Y Adeola, S Brito, J Stocks, Spectrum Medical Research, Gaffney SC; B Frandsen, M Weigelt, E Stehouwer, Sound Medical Research, Port Orchard WA; C Ince, P Stephen, B Shadi, C Jeffrey, W Kenneth, Maryland Cardiovascular Specialists, Baltimore MD; T Thethi, G R A Carpio, R H McDuffie, C S. Moreau, C B. Stell, B Katalenich, C McKendall-Lewis, W Htun, K Conroy, D Lovre, R Galagan, C Carrion Olmeda, A Sihota, S Shah, A Barton, Tulane Health Sciences Center, New Orleans LA; R Beasley, P Nankivel, M Aberle, Health Concepts, Rapid City, SD; I Machin, J Porras, D Rodriguez, A Albornoz, Altus Research, Inc., Lake Clarke Shores, FL; A Haidar, R H. Lopez-Santini, G F. Rivero, Mississippi Medical Research, LLC, Carriere MI; G Robins, L A. Colyar, C R. Hutchins, D L. Sturm, K A. Hart, T. Keith Phillips, C D. Montgomery, P J. Taylor, State of Franklin Healthcare Associates, PLLC, Johnson City TN; W Albrecht, K Fehlis, J Lee, D Overman, M Box, D Villarreal- Martinez, D David- Svatek, Hill Country Medical Associates, New Braunfels TX; D Ajani, Z Shaikh, Southwest Clinical Trials, Houston TX; K Wheeler, M Brown, C Sekhar Ghosh, I Bandukwala, S Kleber, J Madden, M Bishara, K Perry, Laureate Medical Group at Northside, LLC, Atlanta GA; J Paoli-Bruno, J Paoli-Bruno, E Abreu, Coral Research Clinic Corp, Miami FL; R Espiritu, O Zmeili, Summa Health System, Akron OH; T Christensen, S D. Grubb, S Beloff, A R. Caugh, Calabash Medical Center, Calabash NC; C van Dijk, R Yalavarthy, J DeGrauw, S Fabian, D Gillum, G Corrigan, H Singh, K Jensen, S DeMore, T Montague, Western Nephrology & Metabolic Bone Disease, PC, Arvada CO; F Zieve, J R. Levy, S K. Fredrickson, P E. Tarkington, McGuire DVA Medical Center, Richmond VA; R Patel, P Chapla, Lycoming Internal Medicine, Inc., Jersey Shore PA; A Salacata, U Walls, Endeavor Medical Research, Alpena MI; R Iyer, K Nguyen, J Lettman, B Appleman, F Safavie, L Scaliem, Nova Health Management & Research Group, PC, Herndon VA; F Eder, S A. Maklad, B Roxana Schlaen, J L. Molstead, J A. Hartwell, D Ann Hubish, R Daniel Little, K Maria Rando, United Medical Associates, Johnson City NY; R L Kelly, M S Drury, P Si-Hai Young, S J Wininger, A Harman, Precision Trials, LLC, Phoenix AZ; R Daza, C R Reyes, S Robbin, M Sanchez, I Rivera, R Hernandez, Precision Research Organization, LLC, Miami Lakes FL; L Martinez, M Garcia-Estrada, N Iglesias, Innovation Medical Research Center, Inc, Miami FL; A Dobs, A Andrade, Johns Hopkins University School Of Medicine, Baltimore MD; S Falkowski, T Parrott, A Koon, T Wood, E Burkett, K Chavous, A Gupta, C Estes, D Loud, S Rhodes, Southeast Clinical Research, LLC, Chiefland FL; M Chen, L Bromley, R Palma, Corvallis Clinic PC, Corvallis OR; D Kattan, U Kirk, Clearview Medical Research, LLC, Los Angeles, CA; H Tatu, R Stamatina, H Tatu, S Lupea, M Frasier, Remedica LLC, Rochester MI; H Colfer, L Kane, A Teklinski, H Colfer, G Gadowski, P Levanovich, McLaren Northern Michigan Hospital, Petoskey MI; F Saba, L Confident, S Hossain, B Steinberg, B Philippe, S Choroenthkongtrakal, Professional Health Care of Pinellas, St. Petersburg, FL; F Boccalandro, R Anand, V Syam, A Manohar, P Suresh, P Madhusudhan, Permian Research Foundation,

Odessa TX; P Patel, P Cambier, J Klonaris, W Cheng, S R Fisher, M E Schelle, L M. Reese, S L. McLean, BayCare Medical Group, Clearwater FL; J Poock, J Hoens, A Rosie, R Welshons, Northeast Iowa Medical Education Foundation, Waterloo IA; J Dean, P D. Kuhlman, R A. Luke, L Lohrbauer, M S. Cunningham, P Buday, M Lehmann, K Chrzanowski, St. Vincent's Cardiology, Jacksonville FL; A Fletcher, J Hargrove, F Harris, Cardiology & Medicine Clinic, Little Rock AR; G Debs-Perez, A Maiquez, L Cordoves, M Georgescu, H Tayoun, Harmony Clinical Research, Inc., North Miami Beach FL; F Munoz, J Perez, D Ortiz, Dr Guillermo Munoz, USMA Clinical Research/Union Square Medical Associates, Elizabeth NJ; R Garcia, R Reyes, Covenant Clinical Research, PA, San Antonio TX; I Hamzeh, A Misra, L Zhang, Ben Taub General Hospital, Houston TX; L Forgosh, K Loria, C Roncari, J Hommerding, G Morris, C Lebron, K Blake, K LaVenture, C Lange, Health East St. Joseph's Hospital, St. Paul MN; L Levinson, T Baungarten, S Edevante, S Shawley, H Moyer, K Elliott, K Iachini, Clinical Research Associates of Central PA, Altoona PA; R Rajan, C J. Davis, S Hossain, A M. Shattuck, Nova Clinical Research, LLC, Bradenton FL; W Simon, G F. Lakin, N B. Secrist, W C. Simon, D Buth, D M. Steere, K Talbot, Professional Research Network of Kansas, LLC, Wichita KS; N Singh, N B. Secrist, Atlanta Heart Specialists, LLC, Cumming GA; R Mascolo, S B. Sloan, J J. Kmetzo, J Brown, L Carter, Doylestown Health Cardiology, a division of Doylestown Health Physicians, Doylestown PA; M Lawrence, D M. Steere, Down East Medical Associates, PA, Morehead City NC; C Arauz-Pacheco, K Talbot, D Lender, Texas Health Physicians Group, Dallas TX; W Kozlow, J Perez, L Cavanaugh, J Wilson, Intercoastal Medical Group, Sarasota FL; P Gujja, F Akhter, M Khan, A Mohammed, S Satyavolu, M Ashraf, Apex Medical Research, AMR, Inc., Springfield OH; D Dev, HB Yalamanchili, CI Sumeyye, Salem VAMC, Salem VA; H Fernandes, F Myles Chaleff, M J Jancko, Infinity Clinical Research, LLC, Plantation FL; S Mujica Trenche, W Kaplan, S Mujica Trenche, S Wilcox, Alas Science Clinical Research, Las Vegas NV; M Goisse, M David Rua, J Black, K Chapman, Frontier Clinical Research, LLC, Smithfield PA; D Suh, L Yan, D Song, S Chanara, Atlanta Heart Specialists, LLC, Tucker GA; V Houchin, A McKeinness, Harrisburg Family Medical Center, Harrisburg AR; R Sotolongo, K Gutierrez, Research Institute of South Florida, Miami FL; B Miranda-Palma, M del Pilar Solano, University of Miami, Miami FL; M Jain, The Methodist Hospital Research Institute, Pearland TX; J Needell, A Banerjee, M Jarratt, Clinical Research of Gastonia, Gastonia NC.

## **eAppendix 2. Trial Committees and Independent Statistical Center**

### *Steering Committee*

Julio Rosenstock (Chair), Dallas Diabetes Research Center at Medical City, University of Texas, Southwestern Medical Center, Dallas, USA; Vlado Perkovic (Co-chair), George Institute for Global Health, University of NSW, Sydney, Australia; Darren K McGuire (Co-chair), University of Texas, Southwestern Medical Center, and Parkland Hospital and Health System Outpatient Cardiology clinics, Dallas, USA; Bernard Zinman, Lunenfeld-Tanenbaum Research Institute, Mount Sinai Hospital, University of Toronto, Toronto, Canada; Christoph Wanner, Division of Nephrology, University Hospital Würzburg, Würzburg, Germany; Robert Toto, University of Texas Southwestern Medical School, Dallas, USA; John Alexander, Duke Clinical Research Institute, Duke Medicine, Durham, USA; Michael Pencina, Duke Clinical Research Institute, Biostatistics, Durham, USA; Steven E Kahn, Division of Metabolism, Endocrinology and Nutrition, Department of Medicine, VA Puget Sound Health Care System and University of Washington, Division of Metabolism, Endocrinology & Nutrition, Department of Medicine, Seattle, USA; Nikolaus Marx, Department of Internal Medicine I, University Hospital Aachen, RWTH Aachen University, Germany; Mark Cooper, Department of Diabetes, Central Clinical School, Monash University and Baker Heart and Diabetes Institute, Melbourne, Australia; Stefan Hantel, Boehringer Ingelheim Pharma GmbH & Co. KG, Biberach, Germany; Hans J. Woerle, University of Ulm, Ulm, Germany; Maximilian von Eynatten, Boehringer Ingelheim Pharma GmbH & Co. KG, Ingelheim, Germany; Jyothis T George, Boehringer Ingelheim Pharma GmbH & Co. KG, Ingelheim, Germany; Egon Pfarr, Boehringer Ingelheim Pharma GmbH & Co. KG, Ingelheim, Germany; David Baanstra, Boehringer Ingelheim, the Netherlands; Thomas Meinicke, Boehringer Ingelheim Pharma GmbH & Co. KG, Biberach, Germany; Odd Erik Johansen, Boehringer Ingelheim KS, Asker, Norway.

### *Data Monitoring Committee*

Kennedy R Lees (Chair), University of Glasgow, Glasgow, UK; Francine K. Welty, Beth Israel Deaconess Medical Center, Boston, USA; Klaus G. Parhofer, University of Munich, Munich, Germany; Kåre I Birkeland, Oslo University Hospital, Oslo, Norway; Janet McGill, Washington University School of Medicine, St Louis, USA; Jan G.P. Tijssen, Academic Medical Center – University of Amsterdam, the Netherlands.

### *Clinical Event Committee: Cardiology*

Peter Clemmensen, Department for General and Interventional Cardiology, University Heart Center Hamburg-Eppendorf, Hamburg, Germany and Institute for Regional Research, University of Southern Denmark, Nykøbing, Denmark; Steen Pehrson, Heart Center of 'Rigshospitalet', the Copenhagen University Hospital, Copenhagen, Denmark; Peer Grande, Nykøbing Hospital, Nykøbing, Denmark; James Januzzi Jr and Malissa J. Wood, Massachusetts General Hospital, Boston, USA; Mark Petrie, Golden Jubilee National Hospital, Glasgow, UK.

*Clinical Event Committee: Neurology*

Tiina Sairanen, Turgut Tatlisumak, Lauri Soinne, Helsinki University Central Hospital, Helsinki, Finland; Carlos Kase, Boston University Medical Center, Boston, USA; Tanya Turan, Medical University of South Carolina (MUSC) Stroke Program, Charleston, USA.

*Clinical Event Committee: Renal*

Johannes Mann (Chair), Friedrich Alexander Univ or Erlangen, Germany, Population Health Research Institute, McMaster University, Canada, KfH Kidney Center, Munich, Germany; Rajiv Agarwal, Indiana University School of Medicine & VA Medical Center, Indianapolis, USA; Damian Fogarty, Belfast City Hospital at the Belfast Trust, Belfast, Northern Ireland, UK; Sankar Navaneethan, 5510 Wollemi Falls Lane, Sugar Land, TX, USA; Titte Srinivas, 276 Bayview Dr, Mt Pleasant, SC, USA

*Clinical Event Committee: Pancreatic*

Christopher Forsmark, Division of Gastroenterology, Hepatology, and Nutrition, University of Florida, Gainesville, USA; Steven Freedman, Beth Israel Deaconess Medical Center, Boston, USA; Jean-Louis Frossard, Division of Gastroenterology, Geneva University Hospital, Geneva, Switzerland; Andres Gelrud, University of Chicago, Chicago, USA; Julia Mayerle, Medizinische Klinik und Poliklinik II, Klinikum der LMU München-Grosshadern, Munich, Germany

*Oncology relatedness assessment committee*

Richard J Lee (Chair), Massachusetts General Hospital Cancer Center and Harvard Medical School, Boston, Rebecca Heist, Massachusetts General Hospital and Harvard Medical School, Boston, USA; USA; Ryan J Sullivan, Massachusetts General Hospital Cancer Center, Harvard Medical School, Boston, USA; Elizabeth I Buchbinder, Division of Oncology, Dana Farber Cancer Institute, Boston, USA; Gerald Chodak, Midwest Prostate and Urology Health Center, Weiss Memorial Hospital, Chicago, USA, Martin J Edelman, University of Maryland Greenbaum Cancer Center, Baltimore, USA

*Independent Statistical Center*

Vivian Thompson, Adrian Coles, Duke Clinical Research Institute, Durham, NC, USA

### eAppendix 3. Inclusion Criteria

- 1) Documented diagnosis of type 2 diabetes before visit 1 (screening).
- 2) Male or female patients who are drug-naïve or pre-treated with any antidiabetic background therapy, excluding treatment with GLP-1 receptor agonists, DPP-4 inhibitors or SGLT-2 inhibitors if  $\geq 7$  consecutive days.
- 3) Stable antidiabetic background medication (unchanged daily dose) for at least 8 weeks prior to randomization. If insulin is part of the background therapy, the average daily insulin dose should not have been changed by more than 10% within the 8 weeks prior to randomization compared with the daily insulin dose at randomization.
- 4) HbA1c of  $\geq 6.5\%$  and  $\leq 10.0\%$  at visit 1 (screening).
- 5) Age  $\geq 18$  years at visit 1 (screening). *For Japan only: Age  $\geq 20$  years at Visit 1.*
- 6) Body Mass Index (BMI)  $\leq 45 \text{ kg/m}^2$  at visit 1 (screening).
- 7) Signed and dated written informed consent by date of visit 1 (screening) in accordance with GCP and local legislation prior to any study related procedure.
- 8) High risk of CV events (I and/or II):

|    |                                                                                                                                                                                                                                                                                                                                                                                                                                                                                                                                                                                                                                                                                                                                                                                                                                                                                                                                                                                                                                                                                                                                                                                    |
|----|------------------------------------------------------------------------------------------------------------------------------------------------------------------------------------------------------------------------------------------------------------------------------------------------------------------------------------------------------------------------------------------------------------------------------------------------------------------------------------------------------------------------------------------------------------------------------------------------------------------------------------------------------------------------------------------------------------------------------------------------------------------------------------------------------------------------------------------------------------------------------------------------------------------------------------------------------------------------------------------------------------------------------------------------------------------------------------------------------------------------------------------------------------------------------------|
| I. | Albuminuria (UACR $\geq 30 \text{ mg/g}$ creatinine or $\geq 30 \text{ }\mu\text{g/min}$ [microgram albumin per minute] or $\geq 30 \text{ mg/24 h}$ [milligram albumin per 24 hours] in two out of three unrelated spot urine or timed samples in the last 24 months prior to randomization)* <b>AND</b> previous macrovascular disease, defined as either one or more:                                                                                                                                                                                                                                                                                                                                                                                                                                                                                                                                                                                                                                                                                                                                                                                                           |
| a  | Confirmed history of MI ( $> 2$ months prior to Visit 1)                                                                                                                                                                                                                                                                                                                                                                                                                                                                                                                                                                                                                                                                                                                                                                                                                                                                                                                                                                                                                                                                                                                           |
| b  | Advanced coronary artery disease, defined by any one of the following: <ul style="list-style-type: none"> <li><input type="checkbox"/> <math>\geq 50\%</math> narrowing of the luminal diameter in 2 or more major coronary arteries by coronary angiography, MRI angiography or CT angiography;<br/><i>Definition of major coronary arteries: LAD (Left Anterior Descending). CX (Circumflex) or RCA (right coronary artery)</i></li> <li><input type="checkbox"/> Left main stem coronary artery with <math>\geq 50\%</math> narrowing of the luminal diameter by coronary angiography, MRI angiography or CT angiography;</li> <li><input type="checkbox"/> Prior percutaneous or surgical revascularization of <math>\geq 2</math> major coronary arteries at least 2 months prior to Visit 1 (screening);</li> <li><input type="checkbox"/> The combination of prior percutaneous or surgical revascularization of 1 major coronary artery at least 2 months prior to visit 1 (screening), and <math>\geq 50\%</math> narrowing of the luminal diameter by coronary angiography, MRI angiography or CT angiography of at least 1 additional major coronary artery.</li> </ul> |

|            |                                                                                                                                                                                                                                                                                                                                                                                                                                                                                                                                                                                                                                                                                                                                                                                                                                                                                                                                                                                                                                                                                                                                                                                                                                                                          |
|------------|--------------------------------------------------------------------------------------------------------------------------------------------------------------------------------------------------------------------------------------------------------------------------------------------------------------------------------------------------------------------------------------------------------------------------------------------------------------------------------------------------------------------------------------------------------------------------------------------------------------------------------------------------------------------------------------------------------------------------------------------------------------------------------------------------------------------------------------------------------------------------------------------------------------------------------------------------------------------------------------------------------------------------------------------------------------------------------------------------------------------------------------------------------------------------------------------------------------------------------------------------------------------------|
|            | <p>c High-risk <u>single-vessel coronary artery disease</u>, defined as the presence of <math>\geq 50\%</math> narrowing of the luminal diameter of one major coronary artery by coronary angiography, MRI angiography or CT angiography in patients not revascularized:</p> <p><b>AND</b> at least one of the following:</p> <ul style="list-style-type: none"> <li>□ A positive non invasive stress-test, confirmed by either: <ul style="list-style-type: none"> <li>○ a positive ECG exercise tolerance test in patients without left bundle branch block, Wolff-Parkinson-White syndrome, left ventricular hypertrophy with repolarization abnormality, or paced ventricular rhythm, atrial fibrillation in case of abnormal ST-T segments;</li> <li>○ a positive stress echocardiogram showing induced regional systolic wall motion abnormalities;</li> <li>○ a positive nuclear myocardial perfusion imaging stress test showing stress-induced reversible perfusion abnormality;</li> <li>○ a positive cardiac stress perfusion MRI showing a stress induced perfusion defect;</li> </ul> </li> <li>□ Patient discharged from hospital with a documented diagnosis of unstable angina pectoris between 2 and 12 months prior to visit 1 (screening).</li> </ul> |
|            | <p>d History of ischemic or haemorrhagic stroke (&gt;3 months prior to visit 1)</p>                                                                                                                                                                                                                                                                                                                                                                                                                                                                                                                                                                                                                                                                                                                                                                                                                                                                                                                                                                                                                                                                                                                                                                                      |
|            | <p>e Presence of carotid artery disease (symptomatic or not) documented by either:</p> <ul style="list-style-type: none"> <li>○ imaging techniques with at least one lesion estimated to be <math>\geq 50\%</math> narrowing of the luminal diameter;</li> <li>○ prior percutaneous or surgical carotid revascularization.</li> </ul>                                                                                                                                                                                                                                                                                                                                                                                                                                                                                                                                                                                                                                                                                                                                                                                                                                                                                                                                    |
|            | <p>f Presence of peripheral artery disease documented by either:</p> <ul style="list-style-type: none"> <li>○ previous limb angioplasty, stenting or bypass surgery;</li> <li>○ previous limb or foot amputation due to macrocirculatory insufficiency;</li> <li>○ angiographic evidence of peripheral artery stenosis <math>\geq 50\%</math> narrowing of the luminal diameter in at least one limb (definition of peripheral artery: common iliac artery, internal iliac artery, external iliac artery, femoral artery, popliteal artery).</li> </ul>                                                                                                                                                                                                                                                                                                                                                                                                                                                                                                                                                                                                                                                                                                                  |
| <p>II.</p> | <p>Evidence of impaired renal function with predefined UACR, with or without CV co-morbidities, defined as follows (and/or criteria):</p> <ul style="list-style-type: none"> <li>□ Impaired renal function (as defined by MDRD formula) with an eGFR: 15- &lt;45 mL/min/1.73 m<sup>2</sup> at visit 1 (screening) with any UACR.</li> <li>□ Impaired renal function (as defined by MDRD formula) with an eGFR <math>\geq 45</math>-75 mL/min/1.73 m<sup>2</sup> at visit 1 (screening) with an UACR &gt; 200 mg/g creatinine or &gt; 200 <math>\mu</math>g/min (microgram albumin per minute) or &gt; 200 mg/24 h [milligram albumin per 24 hours] demonstrated in two out of three unrelated spot urine or timed samples in the last 24 months prior to randomization.</li> </ul>                                                                                                                                                                                                                                                                                                                                                                                                                                                                                       |

## eAppendix 4. Exclusion Criteria

- 1) Type 1 diabetes mellitus.
- 2) Treatment ( $\geq 7$  consecutive days) with GLP-1 receptor agonists, other DPP-4 inhibitors or SGLT-2 inhibitors prior to informed consent. Note: This also includes clinical trials where these antidiabetic drugs have been provided to the patient.
- 3) Active liver disease or impaired hepatic function, defined by serum levels of either ALT (SGPT), AST (SGOT), or alkaline phosphatase (AP)  $\geq 3$  x upper limit of normal (ULN) as determined at Visit 1.
- 4) eGFR  $< 15$  ml/min/1.73 m<sup>2</sup> (severe renal impairment or ESRD, MDRD formula), as determined during screening at Visit 1 and/or the need for maintenance dialysis.
- 5) Any previous (or planned within next 12 months) bariatric surgery (open or laparoscopic) or intervention (gastric sleeve).
- 6) Pre-planned coronary artery re-vascularisation (PCI, CABG) or any previous PCI and/or CABG  $\leq 2$  months prior informed consent
- 7) Known hypersensitivity or allergy to the investigational products or its excipients.
- 8) Any previous or current alcohol or drug abuse that would interfere with trial participation in the opinion of the investigator.
- 9) Participation in another trial with an investigational drug ongoing or within 2 months prior to visit 1 (screening)\*.
- 10) Pre-menopausal women (last menstruation  $\leq 1$  year prior to informed consent) who:
  - are nursing or pregnant,
  - or are of child-bearing potential and are not practicing an acceptable method of birth control (acceptable methods of birth control include tubal ligation, transdermal patch, intra uterine devices/systems (IUDs/IUSs), oral, implantable or injectable contraceptives, sexual abstinence (if allowed by local authorities), double barrier method and vasectomised partner) or do not plan to continue using acceptable method of birth control throughout the study and do not agree to submit to periodic pregnancy testing during participation in the trial.
- 11) Patients considered unreliable by the investigator concerning the requirements for follow-up during the study and/or compliance with study drug administration, have a life expectancy less than 5 years for non-CV causes, or have cancer other than non-melanoma skin cancer within last 3 years, or has any other condition than mentioned which in the opinion of the investigator, would not allow safe participation in the study.
- 12) Acute coronary syndrome (ACS), diagnosed  $\leq 2$  months prior to visit 1 (screening).
- 13) Stroke or TIA  $\leq 3$  months prior to visit 1 (screening).



## **eAppendix 5. Definitions of Major Clinical Outcomes**

### ***Cardiovascular death***

The cause of death was determined by the principal condition that caused the death, not the immediate mode of death. Clinical Events Committee (CEC) members reviewed all available information and used their clinical expertise to adjudicate the cause of death. All deaths not attributed to the categories of CV death and not attributed to a non-CV cause were presumed CV deaths. Death certificates or summary, if possible, were provided for all patients who died, including date and details surrounding death. However, if a death certificate was the only information available for review besides the patient profile in the clinical trial database, the CEC may have decided not to use this information as cause of death if another etiology appeared more plausible. The following definitions were used for the adjudication of fatal cases:

### ***Sudden cardiac death***

Death that occurs unexpectedly in a previously stable patient and includes the following deaths:

- Witnessed and instantaneous without new or worsening symptoms
- Witnessed within 60 minutes of the onset of new or worsening cardiac symptoms
- Witnessed and attributed to an identified arrhythmia (e.g., captured on ECG recording or witnessed on a monitor by either a medic or paramedic)
- Subjects unsuccessfully resuscitated from cardiac arrest or successfully resuscitated from cardiac arrest but who die within 24 hours without identification of a non-cardiac etiology
- Unwitnessed death and there is no conclusive evidence of another, non-CV, cause of death (i.e. presumed CV death)

### ***Sudden death due to acute MI (MI type 3)***

Sudden death occurring up to 14 days after a documented acute MI (verified either by the diagnostic criteria outlined for acute MI or by autopsy findings showing recent MI or recent coronary thrombus) and where there is no conclusive evidence of another cause of death. If death occurs before biochemical confirmation of myocardial necrosis can be obtained, adjudication should be based on clinical presentation and ECG evidence.

### ***Death due to heart failure or cardiogenic shock***

Death occurring in the context of clinically worsening symptoms and/or signs of congestive heart failure (CHF) without evidence of another cause of death.

New or worsening signs and/or symptoms of CHF include any of the following:

- New or increasing symptoms and/or signs of heart failure requiring the initiation of, or an increase in, treatment directed at heart failure or occurring in a patient already receiving maximal therapy for heart failure
- Heart failure symptoms or signs requiring continuous intravenous therapy or oxygen administration
- Confinement to bed predominantly due to heart failure symptoms
- Pulmonary edema sufficient to cause tachypnea and distress not occurring in the context of an acute myocardial infarction or as the consequence of an arrhythmia occurring in the absence of worsening heart failure
- Cardiogenic shock not occurring in the context of an acute MI or as the consequence of an arrhythmia occurring in the absence of worsening heart failure
  - Cardiogenic shock is defined as SBP <90 mmHg for more than 1 hour, not responsive to fluid resuscitation and/or heart rate correction, and felt to be secondary to cardiac dysfunction and associated with at least one of the following signs of hypoperfusion:
    - Cool, clammy skin
    - Oliguria (urine output < 30 mL/hour)
    - Altered sensorium
    - Cardiac index < 2.2 L/min/m<sup>2</sup>
  - Cardiogenic shock can also be defined in the presence of SBP ≥90 mmHg or for a time period <1 hour if the blood pressure measurement or the time period is influenced by the presence of positive inotropic or vasopressor agents alone and/or with mechanical support <1 hour. The outcome of cardiogenic shock will be based

on CEC assessment and must occur after randomization. Episodes of cardiogenic shock occurring before and continuing after randomization will not be part of the study outcome. This category will include sudden death occurring during an admission for worsening heart failure

### ***Death due to stroke, cerebrovascular event***

Death occurring up to 30 days after a stroke that is either due to the stroke or caused by complication of the stroke.

### ***Death due to other CV causes***

Death must be due to a fully documented CV cause not included in the above categories (e.g. dysrhythmia, pulmonary embolism, or CV intervention). Death due to a MI that occurs as a direct consequence of a CV investigation/procedure/ operation will be classified as death due to other CV cause.

### ***Non-CV death***

Non-CV death is defined as any death not covered by cardiac death or vascular death. The CEC will be asked to indicate the most likely cause of non-CV death. Examples of non-CV death are: pulmonary causes, renal causes, gastrointestinal causes, infection (including sepsis), non-infectious (e.g., systemic inflammatory response syndrome (SIRS)), malignancy (i.e., new malignancy, worsening of prior malignancy), hemorrhage (not intracranial), accidental/trauma, suicide, non-CV organ failure (e.g., hepatic failure) or non-CV surgery.

### ***Myocardial infarction (MI) (non-fatal)***

The term MI should be used when there is evidence of myocardial necrosis in a clinical setting consistent with myocardial ischemia. Under these conditions, any one of the following criteria A to C meets the diagnosis for myocardial infarction.

#### ***Criteria A: Spontaneous MI (type 1)***

To identify a type 1 MI, patients should demonstrate spontaneous symptoms of myocardial ischemia unprovoked by supply/demand inequity, together with  $\geq 1$  of the following criteria:

- Cardiac biomarker elevation: Troponin is the preferred marker for use to adjudicate the presence of acute myocardial infarction. At least one value should show a rise and/or fall above the lowest cut-point providing 10% imprecision (typically the upper reference limit for the troponin run per standard of clinical care). Creatine kinase-MB is a secondary choice to troponin; a rise of CK-MB above the local upper reference limit would be consistent with myocardial injury
- ECG changes consistent with new ischemic changes

- ECG changes indicative of new ischemia (new ST-T changes or new left bundle branch block [LBBB]) or ECG manifestations of acute myocardial ischemia (in absence of left ventricular hypertrophy [LVH] and LBBB):
- Development of pathological Q waves in the ECG
  - Any Q-wave in leads V2-V3  $\geq 0.02$  seconds or QS complex in leads V2 and V3
  - Q-wave  $\geq 0.03$  seconds and  $\geq 0.1$  mV deep or QS complex in leads I, II, aVL, aVF, or V4-V6 in any two leads of a contiguous lead grouping (I, aVL, V6; V4-V6; II, III, and aVF)
- ST elevation: New ST elevation at the J-point in two contiguous leads with the cut-off points:  $\geq 0.2$  mV in men or  $\geq 0.15$  mV in women in leads V2-V3 and/or  $\geq 0.1$  mV in other leads
- ST depression and T-wave changes: New horizontal or down-sloping ST depression  $\geq 0.05$  mV in two contiguous leads; and/or T inversion  $\geq 0.1$  mV in two contiguous leads with prominent R-wave or R/S ratio  $>1$
- Imaging evidence of new non-viable myocardium or new wall motion abnormality

*Criteria B: "Demand" related (type 2) MI*

- Patients with type 2 MI should be considered with similar diagnostic criteria as a type 1 MI, however type 2 MI should be considered present when myocardial ischemia and infarction are consequent to supply/demand inequity, rather than a spontaneous plaque rupture and coronary thrombosis.

*Criteria C: Percutaneous Coronary Intervention (PCI)-related MI (type 4a/4b)*

- For PCI in patients with normal baseline troponin values, elevations of cardiac biomarkers above the 99th percentile URL within 24 hours of the procedure are indicative of peri-procedural myocardial necrosis. By convention, increases of biomarkers  $>3$  x 99th percentile URL (troponin or CK-MB  $>3$  x 99th percentile URL) are consistent with PCI-related MI.
- If the cardiac biomarker is elevated prior to PCI, a  $\geq 20\%$  increase of the value in the second cardiac biomarker sample within 24 hours of PCI and documentation that cardiac biomarker values were decreasing (two samples  $\geq 6$  hours apart) prior to the suspected recurrent MI is consistent with PCI-related MI.
- Symptoms of cardiac ischemia are not required.

*Criteria D: Coronary Artery Bypass Grafting (CABG)-related MI (type 5)*

- For CABG in patients with normal baseline troponin values, elevation of cardiac biomarkers above the 99th percentile URL within 72 hours of the procedure is indicative of peri-procedural myocardial necrosis. By convention, an increase of biomarkers  $>5$  x 99th

percentile URL (troponin or CK-MB >5 x 99th percentile URL) plus at least one of the following

- New pathological Q waves in at least 2 contiguous leads on the electrocardiogram that persist through 30 days or new LBBB
  - Angiographically documented new graft or native coronary artery occlusion
  - Imaging evidence of new loss of viable myocardium is consistent with CABG-related MI
- If the cardiac biomarker is elevated prior to CABG, a  $\geq 20\%$  increase of the value in the second cardiac biomarker sample within 72 hours of CABG and documentation that cardiac biomarker values were decreasing (two samples  $\geq 6$  hours apart) prior to the suspected recurrent MI plus new pathological Q waves in  $\geq 2$  contiguous leads on the electrocardiogram or new LBBB, angiographically documented new graft or native coronary artery occlusion, or imaging evidence of new loss of viable myocardium is consistent with a periprocedural MI after CABG. Symptoms of cardiac ischemia are not required.

### ***Clinical classification of acute MI***

For every MI identified by the CEC, one of the following will be assigned:

- Type 1: Spontaneous MI related to ischemia due to a primary coronary event such as plaque erosion and/or rupture, fissuring, or dissection
- Type 2: MI secondary to ischemia due to either increased oxygen demand or decreased supply, e.g. coronary artery spasm, coronary embolism, anemia, arrhythmias, hypertension, or hypotension
- Type 3: Sudden unexpected cardiac death, including cardiac arrest, often with symptoms suggestive of myocardial ischemia, accompanied by presumably new ST elevation, or new LBBB, or evidence of fresh thrombus in a coronary artery by angiography and/or at autopsy, but death occurring before blood samples could be obtained, or at a time before the appearance of cardiac biomarkers in the blood
- Type 4a: MI associated with PCI
- Type 4b: MI associated with stent thrombosis as documented by angiography or at autopsy
- Type 5: MI associated with CABG

### ***Hospitalization for unstable angina***

The date of this event is the day of hospitalization of the patient including any overnight stay at an emergency room or chest pain unit. Unstable angina requiring hospitalization is defined as all of the following:

- No elevation in cardiac biomarkers (cardiac biomarkers are negative for myocardial necrosis) according to conventional assays or contemporary sensitive assays
- Clinical presentation: Cardiac symptoms lasting  $\geq 10$  minutes and considered to be myocardial ischemia on final diagnosis with one of the following:
  - Rest angina
  - New-onset (<2 months) severe angina (Canadian Cardiovascular Society [CCS] Grading Scale, or CCS classification system, classification severity  $\geq$ III)
  - Increasing angina (in intensity, duration, and/or frequency) with an increase in severity of >1 CCS class to CCS class >III

| Class     | Description of stage                                                                                                                                                                                                                                                                                                                                                                                      |
|-----------|-----------------------------------------------------------------------------------------------------------------------------------------------------------------------------------------------------------------------------------------------------------------------------------------------------------------------------------------------------------------------------------------------------------|
| Class I   | “Ordinary physical activity does not cause . . . angina,” such as walking or climbing stairs. Angina occurs with strenuous, rapid, or prolonged exertion at work or recreation                                                                                                                                                                                                                            |
| Class II  | “Slight limitation of ordinary activity.” Angina occurs on walking or climbing stairs rapidly; walking uphill; walking or stair climbing after meals; in cold, in wind, or under emotional stress; or only during the few hours after awakening. Angina occurs on walking more than 2 blocks on the level and climbing more than 1 flight of ordinary stairs at a normal pace and under normal conditions |
| Class III | “Marked limitations of ordinary physical activity.” Angina occurs on walking 1 to 2 blocks on the level and climbing 1 flight of stairs under normal conditions and at a normal pace                                                                                                                                                                                                                      |
| Class IV  | “Inability to carry on any physical activity without discomfort—anginal symptoms may be present at rest”                                                                                                                                                                                                                                                                                                  |

- Requiring an unscheduled visit to a healthcare facility and overnight admission
- At least one of the following:
  - New or worsening ST or T wave changes on ECG. ECG changes should satisfy the following criteria for acute myocardial ischemia in the absence of LVH and LBBB:
    - ST elevation: New transient (known to be <20 minutes) ST elevation at the J-point in two contiguous leads with the cut-off points -  $\geq 0.2$  mV in men or  $\geq 0.15$  mV in women in leads V2-V3 and/or  $\geq 0.1$  mV in other leads

- ST depression and T-wave changes: New horizontal or down-sloping ST depression  $\geq 0.05$  mV in two contiguous leads; and/or T inversion  $\geq 0.1$  mV in two contiguous leads with prominent R-wave or R/S ratio  $>1$
- Evidence of ischemia on stress testing with cardiac imaging
- Evidence of ischemia on stress testing with angiographic evidence of  $\geq 70\%$  lesion and/or thrombus in an epicardial coronary artery or initiation/increased dosing of antianginal therapy
- Angiographic evidence of  $\geq 70\%$  lesion and/or thrombus in an epicardial coronary artery

### **Stent thrombosis**

#### Timing

| Type                        |                           | Timing                                        |
|-----------------------------|---------------------------|-----------------------------------------------|
| Early stent thrombosis      | Acute stent thrombosis    | 0 to 24 hours after stent implantation        |
|                             | Subacute stent thrombosis | >24 hours to 30 days after stent implantation |
| Late stent thrombosis*      |                           | >30 days to 1 year after stent implantation   |
| Very late stent thrombosis* |                           | >1 year after stent implantation              |

Stent thrombosis should be reported as a cumulative value over time and at the various individual time points specified above. Time 0 is defined as the time point after the guiding catheter has been removed and the patient has left the catheterization laboratory

\*Includes primary as well as secondary late stent thrombosis; secondary late stent thrombosis is a stent thrombosis after a target lesion revascularization

#### *Definitions of definite, probable, and possible stent thrombosis*

Definite stent thrombosis is considered to have occurred by either angiographic or pathological confirmation:

- Angiographic confirmation of stent thrombosis: The presence of an intracoronary thrombus that originates in the stent or in the segment 5 mm proximal or distal to the stent and presence of  $\geq 1$  of the following criteria within a 48-hour time window:
  - Acute onset of ischemic symptoms at rest
  - New ischemic ECG changes that suggest acute ischemia

- Typical rise and fall in cardiac biomarkers (refer to definition of spontaneous MI: troponin or CK-MB >99th percentile of URL, according to conventional assays or contemporary sensitive assays)
- Non-occlusive thrombus Intracoronary thrombus is defined as a (spheric, ovoid, or irregular) noncalcified filling defect or lucency surrounded by contrast material (on 3 sides or within a coronary stenosis) seen in multiple projections, or persistence of contrast material within the lumen, or a visible embolization of intraluminal material downstream
- Occlusive thrombus TIMI 0 or TIMI 1 intrastent or proximal to a stent up to the most adjacent proximal side branch or main branch (if originates from the side branch)

NOTE: The incidental angiographic documentation of stent occlusion in the absence of clinical signs or symptoms is not considered a confirmed stent thrombosis (silent occlusion)

- Pathological confirmation of stent thrombosis Evidence of recent thrombus within the stent determined at autopsy or via examination of tissue retrieved following thrombectomy

Probable Stent Thrombosis is considered to have occurred after intracoronary stenting in the following cases:

- Any unexplained death within the first 30 days
  - In ST-elevation MI population, one may consider the exclusion of unexplained death within 30 days as evidence of probable stent thrombosis
- Irrespective of the time after the index procedure, any MI that is related to documented acute ischemia in the territory of the implanted stent without angiographic confirmation of stent thrombosis and in the absence of any other obvious cause

Possible Stent Thrombosis is considered to have occurred with any unexplained death from 30 days after intracoronary stenting until end of trial follow-up.

### ***Heart Failure (HF) requiring hospitalization***

The date of this event is the day of hospitalization of the patient including any overnight stay at an emergency room or chest pain unit. HF requiring hospitalization is defined as an event that meets all of the following criteria:

- Requires hospitalization defined as an admission to an inpatient unit or a visit to an emergency department that results in at least a 12-hour stay (or a date change if the time of admission/discharge is not available)
- Clinical manifestations of heart failure (new or worsening) including at least one of the following:
  - Dyspnea



- Orthopnea
  - Paroxysmal nocturnal dyspnea
  - Edema
  - Pulmonary basilar crackles
  - Jugular venous distension
  - Third heart sound or gallop rhythm
  - Radiological evidence of worsening heart failure
- Additional/increased therapy: at least one of the following:
    - Initiation of oral diuretic, intravenous diuretic, inotrope, or vasodilator therapy
    - Uptitration of oral diuretic or intravenous therapy, if already on therapy
    - Initiation of mechanical or surgical intervention (mechanical circulatory support, heart transplantation or ventricular pacing to improve cardiac function), or the use of ultrafiltration, hemofiltration, or dialysis that is specifically directed at treatment of heart failure

Changes in biomarker (e.g., brain natriuretic peptide) consistent with CHF will support this diagnosis.

### ***Coronary revascularization procedure***

Either CABG or PCI (e.g., angioplasty, coronary stenting).

- CABG: the successful placement of  $\geq 1$  conduit with either a proximal and distal anastomosis or a distal anastomosis only
- PCI: Successful balloon inflation with or without stenting and the achievement of a residual stenosis  $< 50\%$ . The balloon inflation and/or stenting could have been preceded by device activation (e.g., angiojet, directional coronary atherectomy, or rotational atherectomy)

In cases where the procedure leads to a MI (type 4a, 4b or 5) the event will be adjudicated as an MI.

### ***Transient Ischemic Attack (TIA)***

TIA: a transient episode of neurological dysfunction caused by focal brain, spinal cord, or retinal ischemia, without acute infarction.

## **Stroke**

Stroke: the rapid onset of a new persistent neurologic deficit attributed to an obstruction in cerebral blood flow and/or cerebral hemorrhage with no apparent non-vascular cause (e.g., trauma, tumor, or infection). Available neuroimaging studies are considered to support the clinical impression and to determine if there is a demonstrable lesion compatible with an acute stroke. Strokes are classified as ischemic, hemorrhagic, or unknown.

### *Diagnosis of stroke.*

For the diagnosis of stroke, the following 4 criteria should be fulfilled:

- Rapid onset of a focal/global neurological deficit with at least one of the following:
  - Change in level of consciousness
  - Hemiplegia
  - Hemiparesis
  - Numbness or sensory loss affecting one side of the body
  - Dysphasia/aphasia
  - Hemianopia (loss of half of the field of vision of one or both eyes)
  - Other new neurological sign(s)/symptom(s) consistent with stroke

NOTE: If the mode of onset is uncertain, a diagnosis of stroke may be made provided that there is no plausible non-stroke cause for the clinical presentation

- Duration of a focal/global neurological deficit  $\geq 24$  hours OR  $< 24$  hours if this is because of at least one of the following therapeutic interventions:
  - Pharmacologic (i.e., thrombolytic drug administration)
  - Non-pharmacologic (i.e., neurointerventional procedure [e.g. intracranial angioplasty])

OR

- Available brain imaging clearly documents a new hemorrhage or infarct

OR

- The neurological deficit results in death

- No other readily identifiable non-stroke cause for the clinical presentation (e.g., brain tumor, trauma, infection, hypoglycemia, peripheral lesion)

- Confirmation of the diagnosis by at least one of the following:\*
  - Neurology or neurosurgical specialist
  - Brain imaging procedure (at least one of the following):
    - CT scan
    - MRI scan
    - Cerebral vessel angiography
  - Lumbar puncture (i.e. spinal fluid analysis diagnostic of intracranial hemorrhage)

If a stroke is reported but evidence of confirmation of the diagnosis by the methods outlined above is absent, the event will be discussed at a full CEC meeting. In such cases, the event may be adjudicated as a stroke on the basis of the clinical presentation alone, but full CEC consensus is mandatory.

If the acute focal signs represent a worsening of a previous deficit, these signs must have either

- Persisted for more than one week

OR

- Persisted for more than 24 hours and were accompanied by an appropriate new CT or MRI finding

#### *Classification of stroke*

Strokes are sub-classified as follows:

- Ischemic (non-hemorrhagic): A stroke caused by an arterial obstruction due to a thrombotic (e.g., large vessel disease/atherosclerotic or small vessel disease/lacunar) or embolic etiology. This category includes ischemic strokes with hemorrhagic transformation (i.e. no evidence of hemorrhage on an initial imaging study but appearance on a subsequent scan)
- Hemorrhagic: A stroke due to a hemorrhage in the brain as documented by neuroimaging or autopsy. This category includes strokes due to primary intracerebral hemorrhage (intraparenchymal or intraventricular) and primary subarachnoid hemorrhage
- Not assessable: The stroke type could not be determined by imaging or other means (e.g., lumbar puncture, neurosurgery, or autopsy) or no imaging was performed

## **End-stage kidney disease (ESKD)**

The following identifies ESKD:

- Transplantation will be classified as ESKD when the patient undergoes kidney transplantation
- Peritoneal dialysis or hemodialysis for at least 30 days and not known to recover at 90 days. At the termination of the trial, 30 days of renal replacement therapy (RRT) without reasonable chance of renal recovery will be taken as evidence of ESKD
- RRT may be indicated for symptomatic uremia (eGFR < 15 + symptoms) or asymptomatic advanced uremia (eGFR < 10) but RRT may not be available or affordable, or the subject may not elect RRT. In such instances ESKD will be diagnosed even without initiation of RRT. If these conditions are not met, the treating nephrologist must provide documentation for the need of RRT. If at a visit after 30 days if the condition is documented, ESKD is diagnosed.

The date of onset of ESKD is the date of start RRT if applicable, or when the condition was first documented in the clinical database.

If an event is classified as ESKD by the CEC and subsequently the patient elects to withdraw from RRT without demonstrating recovery in eGFR, or signs and symptoms, the CEC decision should not be rescinded.

When a regular course of RRT has not been documented for 60 days or more, questions may arise regarding the event was acute or chronic in nature. If a subject is unable to continue for 60 or more days after initiating chronic RRT due to receiving a renal transplant or the subject dying the event will be classified as ESKD, and the date when RRT was initiated will be considered the date of the event.

## **Death from renal failure**

The following events will be classified as death from renal failure when they satisfy the following criteria:

- The patient dies,  
AND
- RRT has not been initiated (although clinically indicated), e.g., death due to progressive kidney failure occurs before RRT can be introduced
- RRT has been discontinued due to patient withdrawal:
  - The patient refuses RRT or withdraws from chronic RRT, e.g., the caring physician and the patient (or legal representative) decide to withhold the regular course of chronic RRT

AND

- There is no other likely cause of death

If RRT is not provided, for instance, due to terminal cancer then the cause of death is cancer and not renal death since the more proximal cause of death is cancer and not withdrawal. Similarly, if someone dies after refusing RRT due to trauma then death from renal failure cannot be diagnosed. If RRT is discontinued due to hemodynamic instability (such as Heart Failure), the the cause of death is cardiovascular and not renal.

### **Sustained decrease of eGFR of 40% or more**

Sustained decrease in eGFR of 40% or higher (i.e., equal to 40% and above but less than 50%) from baseline (Randomization visit) is defined by evidence of at least two or more consecutive laboratory assessments demonstrating the decrease and by decrease of eGFR to below 60 ml/min. The confirmatory sample is expected to be collected within 4-8 weeks from the initial assessment showing decrease of 40%. However, if the only confirmatory assessment is outside of the window, it will be accepted by the CEC and used for decision making.

CEC will only adjudicate positively cases with no confirmatory assessment when:

- Decrease happened at trial end

OR

- Due to patient's death after the initial decrease

### **Sustained decrease of eGFR of 50% or more**

Sustained decrease in eGFR of 50% or higher (i.e., equal to 50% and above) from baseline (Randomization visit) is defined by evidence of at least two or more consecutive laboratory assessments demonstrating the decrease and by decrease of eGFR to below 60 ml/min. The confirmatory sample is expected to be collected within 4-8 weeks from the initial assessment showing decrease of 50%. However, if the only confirmatory assessment is outside of the window, it will be accepted by the CEC and used for decision making.

CEC will only adjudicate positively cases with no confirmatory assessment when:

- Decrease happened at trial end

OR

- Due to patient's death after the initial decrease

### **Albuminuria progression**

Albuminuria progression is defined as change from normoalbuminuria to either microalbuminuria (UACR  $\geq$  30 mg/g and  $\leq$  300 mg/g) or clinical proteinuria (macroalbuminuria, UACR > 300 mg/g) or from microalbuminuria (UACR  $\geq$  30 mg/g and  $\leq$  300 mg/g) to clinical proteinuria (macroalbuminuria, UACR > 300 mg/g).

### **Retinal laser coagulation**

The following MedDRA preferred terms will be considered: “retinal laser coagulation”, “eye laser surgery”, “laser therapy”, “phototherapy” and “photocoagulation” with a concomitant indication for use “therapy of diabetic retinopathy”.

### **Intra-vitreous injections of an anti-VEGF therapy**

The following treatments will be considered: “Lucentis, ranibizumab compound (WhoDrug preferred term=“RANIBIZUMAB”)”, “Eylea, aflibercept compound (WhoDrug preferred term=“AFLIBERCEPT”)”, “Avastin, bevacizumab compound (WhoDrug preferred term=“BEVACIZUMAB”)” with a concomitant indication for use “therapy of diabetic retinopathy”

### **Therapy of diabetic retinopathy**

The criterion ‘therapy of diabetic retinopathy’ is fulfilled if the indication for use of retinal laser coagulation or Intra-vitreous injections of an anti-VEGF therapy is an adverse event or medical history with preferred code “10012689” (with corresponding preferred term “Diabetic retinopathy”) (MedDRA version 20.1). In addition, the criterion is fulfilled in case of an ongoing baseline condition or reported adverse event of “Diabetic retinopathy” at the start date of the corresponding therapy (except indication for use clearly indicates different underlying disease based on blinded medical review).

## **eAppendix 6. Description of Superiority Tests of 3-Point MACE and the Secondary Kidney Outcome and Their Sensitivity Analyses and Subgroup Analyses**

### *Superiority tests of 3-point MACE and the key secondary kidney outcome.*

Superiority tests of (a) 3-point MACE and (b) the key secondary kidney outcome. Both superiority hypotheses were to be tested separately, at the initial alpha-levels of  $0.2 \times \alpha$  for the primary outcome and  $0.8 \times \alpha$  for the key secondary kidney outcome, respectively.

### *Sensitivity analyses of 3-point MACE and the key secondary kidney outcome*

For the primary and key secondary outcome sensitivity analyses were conducted on the per-protocol set (i.e. excluding patients with important protocol violations), the on-treatment set (i.e. patients with a minimum treatment duration of 30 days, OS) and the treated set with censoring at day 0 (TS+0) and day 30 (TS+30) after last dose of study drug, respectively.

### *Subgroup analyses of 3-point MACE and the key secondary kidney outcome*

Prespecified subgroup analyses were performed in 33 subgroups by baseline age, gender, race, ethnicity, region, glycated hemoglobin, body mass index, blood pressure control, estimated glomerular filtration rate according to the Modification of Diet in Renal Disease equation, urine albumin-to-creatinine ratio, cardiovascular risk factors, risk for kidney disease, history of heart failure, duration of type 2 diabetes, use of glucose-lowering medication, use of lipidlowering drugs, use of anti-hypertensive therapy, and use of antiplatelet drugs.

### *Analysis of Continuous parameters*

Continuous parameters were analysed using mixed-effect models for repeated measures including randomized treatment, region, week, treatment by week interaction, and linear covariates of baseline measurement and baseline by week interaction in the model. An unstructured variance-covariance matrix was specified for the within-subject covariance between weeks. In case of non-convergence, the AR(1) covariance structure was applied. All measurements (independent of discontinuation of medication) are considered.

## eAppendix 7. Observation and On-Treatment Observation Times

eTable 1. Observation and treatment times (years) by randomized treatment groups.

|                                                        | Placebo<br>(N = 3485) | Linagliptin<br>(N = 3494) |
|--------------------------------------------------------|-----------------------|---------------------------|
| <b>Observation – years</b>                             |                       |                           |
| Median (25 <sup>th</sup> – 75 <sup>th</sup> quartile)  | 2.2 (1.6–3.0)         | 2.2 (1.6–3.0)             |
| Mean                                                   | 2.2                   | 2.2                       |
| Cumulative time in study, patient-years                | 7781.6                | 7829.1                    |
| <b>Treatment – years</b>                               |                       |                           |
| Median (25 <sup>th</sup> – 75 <sup>th</sup> quartile)* | 1.8 (1.2–2.5)         | 1.9 (1.2–2.6)             |
| Mean                                                   | 1.9                   | 1.9                       |
| Cumulative time under treatment, patient years         | 6585.9                | 6766.2                    |

\*: 4.0% of patients in the placebo group and 3.8% in the linagliptin group had < 3 months exposure; 46.2% in the placebo group and 49.0% in the linagliptin had ≥ 2 years treatment exposure

eFigure 1. Percentage of patients exposed to trial medication over time by treatment groups

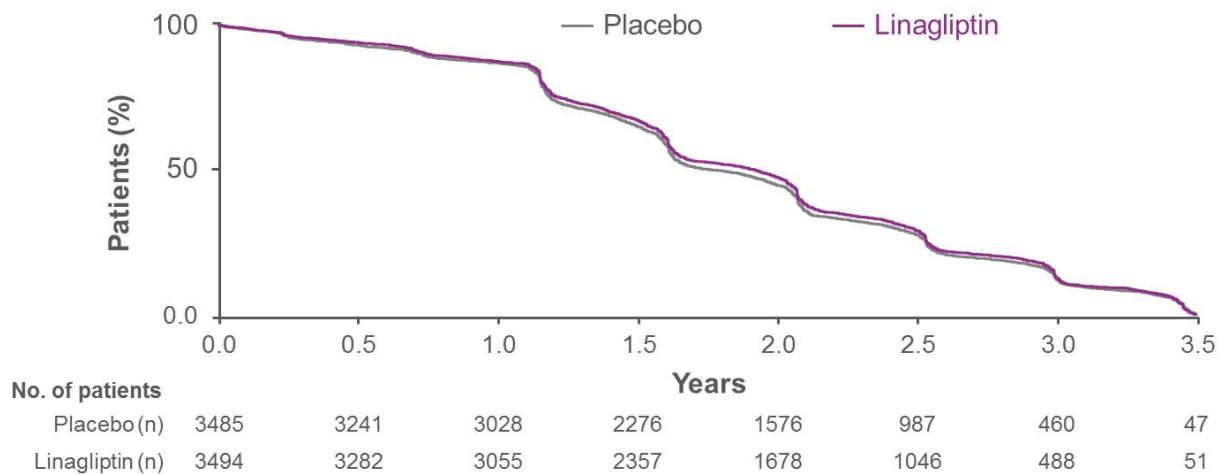



## eAppendix 8. Sensitivity and Subgroup Analyses of the Primary Outcome

eFigure 2. Sensitivity analyses of the primary outcome (3-point MACE)

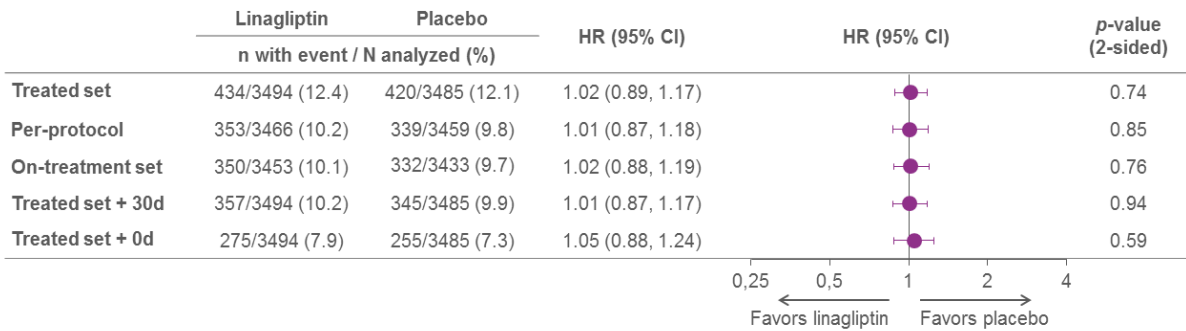

eTable 2. Analyses for the primary outcome (3-point MACE) by pre-specified baseline characteristics.

|                                           | Patients with event/<br>patients analyzed |          | Hazard<br>ratio | (95% CI)   | p-for<br>interaction |
|-------------------------------------------|-------------------------------------------|----------|-----------------|------------|----------------------|
|                                           | Linagliptin                               | Placebo  |                 |            |                      |
| <b>All patients</b>                       | 434/3493                                  | 420/3485 | 1.02            | 0.89, 1.17 |                      |
| <b>Age<sup>a</sup></b>                    |                                           |          |                 |            |                      |
| <65 years                                 | 154/1467                                  | 140/1501 | 1.11            | 0.89, 1.40 | 0.35                 |
| ≥65 years                                 | 280/2027                                  | 280/1984 | 0.97            | 0.82, 1.15 |                      |
| <b>Sex</b>                                |                                           |          |                 |            |                      |
| Male                                      | 282/2148                                  | 276/2242 | 1.06            | 0.90, 1.25 | 0.50                 |
| Female                                    | 152/1346                                  | 144/1243 | 0.96            | 0.77, 1.21 |                      |
| <b>Race</b>                               |                                           |          |                 |            |                      |
| White                                     | 340/2827                                  | 341/2769 | 0.97            | 0.83, 1.13 | 0.24                 |
| Asian                                     | 40/307                                    | 40/333   | 1.09            | 0.70, 1.70 |                      |
| Black/African-American                    | 31/194                                    | 27/217   | 1.30            | 0.78, 2.18 |                      |
| Other                                     | 23/166                                    | 12/166   | 1.86            | 0.93, 3.75 |                      |
| <b>Ethnicity</b>                          |                                           |          |                 |            |                      |
| Hispanic/Latino                           | 143/1227                                  | 130/1274 | 1.13            | 0.89, 1.43 | 0.31                 |
| Not Hispanic/Latino                       | 291/2267                                  | 290/2211 | 0.97            | 0.83, 1.14 |                      |
| <b>Region<sup>b</sup></b>                 |                                           |          |                 |            |                      |
| Europe + South Africa                     | 182/1473                                  | 196/1461 | 0.92            | 0.75, 1.12 | 0.33                 |
| North America                             | 91/593                                    | 72/587   | 1.25            | 0.92, 1.71 |                      |
| Latin America                             | 132/1156                                  | 119/1154 | 1.10            | 0.86, 1.40 |                      |
| Asia                                      | 29/272                                    | 33/283   | 0.90            | 0.55, 1.48 |                      |
| <b>Glycated hemoglobin</b>                |                                           |          |                 |            |                      |
| <8.0%                                     | 229/1915                                  | 243/1855 | 0.90            | 0.75, 1.08 | 0.04                 |
| ≥8.0%                                     | 205/1579                                  | 177/1630 | 1.20            | 0.98, 1.46 |                      |
| <b>Body mass index</b>                    |                                           |          |                 |            |                      |
| <30 kg/m <sup>2</sup>                     | 191/1516                                  | 189/1517 | 0.98            | 0.80, 1.20 | 0.55                 |
| ≥30 kg/m <sup>2</sup>                     | 243/1978                                  | 230/1965 | 1.06            | 0.89, 1.27 |                      |
| <b>Blood pressure control<sup>c</sup></b> |                                           |          |                 |            |                      |
| SBP ≥140 mmHg or DBP<br>≥90 mmHg          | 249/1800                                  | 231/1834 | 1.11            | 0.93, 1.33 | 0.21                 |
| SBP <140 mmHg and DBP<br><90 mmHg         | 185/1694                                  | 189/1651 | 0.93            | 0.76, 1.14 |                      |

|                                                                                            | Patients with event/<br>patients analyzed |          | Hazard<br>ratio | (95% CI)   | p-for<br>interaction |
|--------------------------------------------------------------------------------------------|-------------------------------------------|----------|-----------------|------------|----------------------|
|                                                                                            | Linagliptin                               | Placebo  |                 |            |                      |
| <b>All patients</b>                                                                        | 434/3493                                  | 420/3485 | 1.02            | 0.89, 1.17 |                      |
| <b>Estimated glomerular<br/>filtration rate<sup>d</sup></b>                                |                                           |          |                 |            |                      |
| ≥60 mL/min/1.73m <sup>2</sup>                                                              | 103/1294                                  | 110/1337 | 0.96            | 0.73, 1.25 | 0.84                 |
| ≥45 to <60 mL/min/1.73m <sup>2</sup>                                                       | 81/690                                    | 69/658   | 1.12            | 0.81, 1.54 |                      |
| ≥30 to <45 mL/min/1.73m <sup>2</sup>                                                       | 149/994                                   | 133/944  | 1.07            | 0.84, 1.35 |                      |
| <30 mL/min/1.73m <sup>2</sup>                                                              | 101/516                                   | 108/546  | 0.97            | 0.74, 1.27 |                      |
| <b>Urine albumin-to-<br/>creatinine ratio</b>                                              |                                           |          |                 |            |                      |
| <30 mg/g                                                                                   | 67/696                                    | 60/696   | 1.10            | 0.78, 1.56 | 0.70                 |
| 30 to 300 mg/g                                                                             | 158/1463                                  | 160/1431 | 0.95            | 0.77, 1.19 |                      |
| >300 mg/g                                                                                  | 208/1333                                  | 199/1357 | 1.06            | 0.88, 1.29 |                      |
| <b>Metformin</b>                                                                           |                                           |          |                 |            |                      |
| No                                                                                         | 242/1613                                  | 230/1558 | 1.02            | 0.85, 1.22 | 0.99                 |
| Yes                                                                                        | 192/1881                                  | 190/1927 | 1.02            | 0.83, 1.25 |                      |
| <b>Metformin-dose</b>                                                                      |                                           |          |                 |            |                      |
| ≤1500 mg                                                                                   | 81/787                                    | 80/792   | 1.02            | 0.75, 1.39 | 0.99                 |
| >1500 mg                                                                                   | 111/1094                                  | 110/1135 | 1.02            | 0.78, 1.33 |                      |
| Not on metformin                                                                           | 242/1613                                  | 230/1558 | 1.02            | 0.85, 1.22 |                      |
| <b>Sulfonylurea</b>                                                                        |                                           |          |                 |            |                      |
| No                                                                                         | 315/2392                                  | 314/2345 | 0.98            | 0.84, 1.14 | 0.31                 |
| Yes                                                                                        | 119/1102                                  | 106/1140 | 1.15            | 0.88, 1.49 |                      |
| <b>Insulin</b>                                                                             |                                           |          |                 |            |                      |
| No                                                                                         | 139/1487                                  | 159/1542 | 0.88            | 0.70, 1.11 | 0.13                 |
| Yes                                                                                        | 295/2007                                  | 261/1943 | 1.10            | 0.93, 1.30 |                      |
| <b>Lipidlowering drugs</b>                                                                 |                                           |          |                 |            |                      |
| No                                                                                         | 95/871                                    | 99/839   | 0.90            | 0.68, 1.20 | 0.33                 |
| Yes                                                                                        | 339/2623                                  | 321/2646 | 1.06            | 0.91, 1.24 |                      |
| <b>Angiotensin-converting<br/>enzyme inhibitors/<br/>angiotensin receptor<br/>blockers</b> |                                           |          |                 |            |                      |
| No                                                                                         | 89/634                                    | 101/687  | 0.93            | 0.70, 1.23 | 0.43                 |
| Yes                                                                                        | 345/2860                                  | 319/2798 | 1.06            | 0.91, 1.23 |                      |
| <b>Calcium channel blockers<br/>(CCB)</b>                                                  |                                           |          |                 |            |                      |
| No                                                                                         | 239/2061                                  | 256/2039 | 0.91            | 0.76, 1.08 | 0.04                 |
| Yes                                                                                        | 195/1433                                  | 164/1446 | 1.21            | 0.98, 1.49 |                      |
| <b>Beta blockers</b>                                                                       |                                           |          |                 |            |                      |
| No                                                                                         | 134/1414                                  | 152/1412 | 0.87            | 0.69, 1.09 | 0.08                 |
| Yes                                                                                        | 300/2080                                  | 268/2073 | 1.11            | 0.95, 1.31 |                      |
| <b>Diuretics</b>                                                                           |                                           |          |                 |            |                      |
| No                                                                                         | 159/1602                                  | 134/1549 | 1.15            | 0.92, 1.45 | 0.22                 |
| Yes                                                                                        | 275/1892                                  | 286/1936 | 0.97            | 0.82, 1.14 |                      |
|                                                                                            |                                           |          |                 |            |                      |

|                                                                                                                                                                                                                  | Patients with event/<br>patients analyzed |          | Hazard<br>ratio | (95% CI)   | p-for<br>interaction |
|------------------------------------------------------------------------------------------------------------------------------------------------------------------------------------------------------------------|-------------------------------------------|----------|-----------------|------------|----------------------|
|                                                                                                                                                                                                                  | Linagliptin                               | Placebo  |                 |            |                      |
| <b>All patients</b>                                                                                                                                                                                              | 434/3493                                  | 420/3485 | 1.02            | 0.89, 1.17 |                      |
| <b>Antiplatelet drugs</b>                                                                                                                                                                                        |                                           |          |                 |            |                      |
| No                                                                                                                                                                                                               | 125/1102                                  | 115/1084 | 1.10            | 0.85, 1.42 | 0.50                 |
| Yes                                                                                                                                                                                                              | 309/2392                                  | 305/2401 | 0.99            | 0.85, 1.16 |                      |
| <b>History of heart failure</b>                                                                                                                                                                                  |                                           |          |                 |            |                      |
| No                                                                                                                                                                                                               | 275/2542                                  | 269/2564 | 1.02            | 0.86, 1.21 | 0.96                 |
| Yes                                                                                                                                                                                                              | 159/952                                   | 151/921  | 1.01            | 0.81, 1.27 |                      |
| <b>Duration of type 2 diabetes</b>                                                                                                                                                                               |                                           |          |                 |            |                      |
| ≤ 5 years                                                                                                                                                                                                        | 45/521                                    | 47/553   | 0.98            | 0.65, 1.48 | 0.98                 |
| >5 to <10 years                                                                                                                                                                                                  | 73/696                                    | 71/688   | 1.01            | 0.73, 1.40 |                      |
| ≥10 years                                                                                                                                                                                                        | 316/2277                                  | 302/2244 | 1.03            | 0.88, 1.20 |                      |
| <b>CKD prognosis by KDIGO<sup>e</sup></b>                                                                                                                                                                        |                                           |          |                 |            |                      |
| Low                                                                                                                                                                                                              | 11/232                                    | 11/252   | 1.13            | 0.49, 2.60 | 0.87                 |
| Medium                                                                                                                                                                                                           | 61/766                                    | 68/795   | 0.89            | 0.63, 1.26 |                      |
| High                                                                                                                                                                                                             | 111/995                                   | 96/905   | 1.05            | 0.80, 1.38 |                      |
| Very high                                                                                                                                                                                                        | 250/1499                                  | 245/1533 | 1.04            | 0.87, 1.24 |                      |
| <b>Cardiorenal risk by combinations of macrovascular disease, albuminuria and eGFR<sup>f</sup></b>                                                                                                               |                                           |          |                 |            |                      |
| Cat A                                                                                                                                                                                                            | 117/1361                                  | 120/1367 | 0.97            | 0.75, 1.25 | 0.57                 |
| Cat B                                                                                                                                                                                                            | 86/394                                    | 75/345   | 0.92            | 0.67, 1.25 |                      |
| Cat C                                                                                                                                                                                                            | 33/253                                    | 44/270   | 0.76            | 0.49, 1.20 |                      |
| Cat D                                                                                                                                                                                                            | 163/1153                                  | 147/1156 | 1.12            | 0.89, 1.40 |                      |
| Cat E                                                                                                                                                                                                            | 32/309                                    | 30/303   | 1.13            | 0.68, 1.85 |                      |
| <b>Cardiorenal risk</b>                                                                                                                                                                                          |                                           |          |                 |            |                      |
| Albuminuria and previous macrovascular disease without established renal disease                                                                                                                                 | 117/1361                                  | 120/1367 | 0.97            | 0.75, 1.25 | 0.34                 |
| Established renal disease (eGFR 15 - <45 mL/min/1.73 m <sup>2</sup> with any UACR mg/g or eGFR ≥45-75 mL/min/ 1.73 m <sup>2</sup> with an UACR >200 mg/g) without previous macrovascular and albuminuria disease | 195/1462                                  | 177/1459 | 1.12            | 0.91, 1.37 |                      |
| Albuminuria and previous macrovascular disease plus established renal disease (eGFR 45-75 mL/min/1.73 m <sup>2</sup> with an UACR >200 mg/g or eGFR 15 - <45 mL/min/1.73 m <sup>2</sup> with any UACR mg/g)      | 119/647                                   | 119/615  | 0.88            | 0.69, 1.14 |                      |
|                                                                                                                                                                                                                  |                                           |          |                 |            |                      |

|                                                                                                                           | Patients with event/<br>patients analyzed |          | Hazard<br>ratio | (95% CI)   | p-for<br>interaction |
|---------------------------------------------------------------------------------------------------------------------------|-------------------------------------------|----------|-----------------|------------|----------------------|
|                                                                                                                           | Linagliptin                               | Placebo  |                 |            |                      |
| <b>All patients</b>                                                                                                       | 434/3493                                  | 420/3485 | 1.02            | 0.89, 1.17 |                      |
| <b>Established renal disease<sup>g</sup></b>                                                                              |                                           |          |                 |            |                      |
| Yes                                                                                                                       | 314/2109                                  | 296/2074 | 1.04            | 0.89, 1.22 | 0.68                 |
| No                                                                                                                        | 120/1385                                  | 124/1411 | 0.98            | 0.76, 1.25 |                      |
| <b>Established macrovascular<br/>disease and albuminuria</b>                                                              |                                           |          |                 |            |                      |
| Yes                                                                                                                       | 236/2008                                  | 239/1982 | 0.94            | 0.79, 1.13 | 0.19                 |
| No                                                                                                                        | 198/1486                                  | 181/1503 | 1.13            | 0.92, 1.38 |                      |
| <b>Prevalent kidney disease<br/>(eGFR &lt; 60 mL/min/1.73m<sup>2</sup><br/>or macroalbuminuria<br/>UACR &gt;300 mg/g)</b> |                                           |          |                 |            |                      |
| Yes                                                                                                                       | 374/2606                                  | 348/2541 | 1.04            | 0.90, 1.21 | 0.37                 |
| No                                                                                                                        | 60/887                                    | 72/944   | 0.88            | 0.62, 1.24 |                      |

Cox regression analysis in patients treated with  $\geq 1$  dose of study drug. Subgroup factors were pre-specified for the primary outcome. For the test of homogeneity of the treatment group difference among subgroups (test for group by covariate interaction) no adjustment for multiple tests were performed.

<sup>a</sup>: consistent results in the additional prespecified age subgroups <65, 65-75 and  $\geq 75$  years (p-for interaction 0.09),

<sup>b</sup>: an additional prespecified regional subgroup analyses (Japan, non-Japan) involved too few events to be analysed,

<sup>c</sup>: consistent results in the additional prespecified BP subgroups: SBP < 140 and  $\geq 140$  mmHg (p-for interaction

0.22) and < 160 and  $\geq 160$  (p-for interaction 0.79) mmHg, <sup>d</sup>: consistent results in the additional prespecified

eGFR subgroups < 60 and  $\geq 60$  ml/min/1.73m<sup>2</sup> (p-for interaction 0.62), <sup>e</sup>: Per 2012 KDIGO criteria; Low risk

defined as eGFR  $\geq 60$  ml/min/1.73m<sup>2</sup> and UACR <30 mg/g, Moderately increased risk defined as eGFR 45–59

ml/min/1.73m<sup>2</sup> and UACR <30 mg/g, or eGFR  $\geq 60$  ml/min/1.73m<sup>2</sup> and UACR 30–300 mg/g, High risk defined as

eGFR 30–44 ml/min/1.73m<sup>2</sup> and UACR <30 mg/g, eGFR 45–59 ml/min/1.73m<sup>2</sup> and UACR 30–300 mg/g, or eGFR

$\geq 60$  and UACR >300 mg/g, Very high risk defined as eGFR <30 ml/min/1.73m<sup>2</sup> with any UACR, eGFR 30–44 and

UACR 30–300 mg/g, or eGFR 45–59 ml/min/1.73m<sup>2</sup> and UACR >300 mg/g, <sup>f</sup>: A) albuminuria and previous

macrovascular disease without evidence of impaired renal function, B) albuminuria and previous macrovascular

disease plus renal impairment (eGFR 15–<45 mL/min/1.73 m<sup>2</sup> with any UACR mg/g), C) albuminuria and previous

macrovascular disease plus renal impairment (eGFR  $\geq 45$ -75 mL/min/1.73 m<sup>2</sup> with an UACR >200 mg/g), D) impaired

renal function (eGFR 15-<45 mL/min/1.73 m<sup>2</sup> with any UACR), E) impaired Renal function (eGFR  $\geq 45$ -75

mL/min/1.73 m<sup>2</sup> with an UACR >200 mg/g), <sup>g</sup>: patients in the “yes” category fulfils any one of the categories:

albuminuria and previous macrovascular disease plus renal impairment (eGFR 15 – <45mL/min/1.73m<sup>2</sup> with any

UACR), albuminuria and previous macrovascular disease plus renal impairment (eGFR 45-75 mL/min/1.73 m<sup>2</sup> with

an UACR >200 mg/g), impaired renal function (eGFR 15- <45 mL/min/1.73 m<sup>2</sup> with any UACR mg/g), impaired renal

function (eGFR 45-75 mL/min/1.73 m<sup>2</sup> with UACR >200 mg/g).

## eAppendix 9. Sensitivity and Subgroup Analyses of the Secondary Outcome

eFigure 3 Sensitivity analyses of the secondary kidney composite endpoint

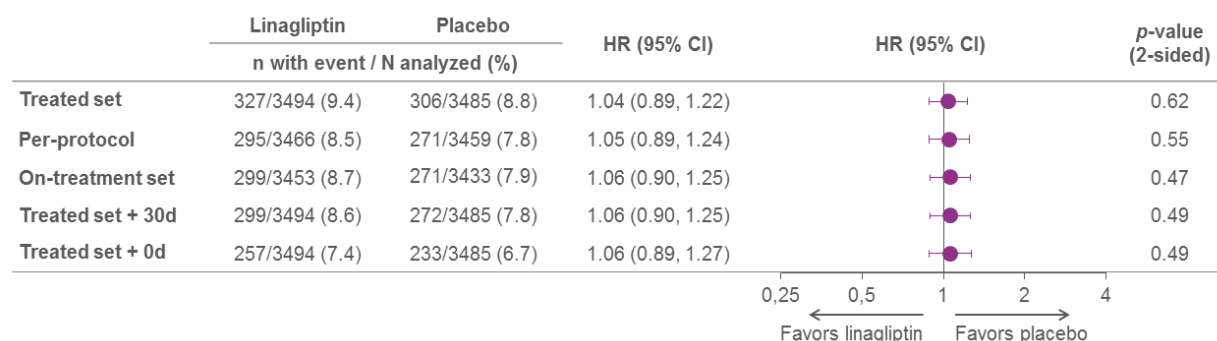

eTable 3 Subgroup analyses for the secondary kidney outcome by pre-specified baseline characteristics.

|                                           | Patients with event/<br>patients analyzed |          | Hazard<br>ratio | (95% CI)   | p-for<br>interaction |
|-------------------------------------------|-------------------------------------------|----------|-----------------|------------|----------------------|
|                                           | Linagliptin                               | Placebo  |                 |            |                      |
| <b>All patients</b>                       | 327/3493                                  | 306/3485 | 1.04            | 0.89, 1.22 |                      |
| <b>Age<sup>a</sup></b>                    |                                           |          |                 |            |                      |
| <65 years                                 | 180/1467                                  | 173/1501 | 1.05            | 0.85, 1.29 | 0.98                 |
| ≥65 years                                 | 147/2027                                  | 133/1984 | 1.05            | 0.83, 1.33 |                      |
| <b>Sex</b>                                |                                           |          |                 |            |                      |
| Male                                      | 210/2148                                  | 189/2242 | 1.12            | 0.92, 1.36 | 0.23                 |
| Female                                    | 117/1346                                  | 117/1243 | 0.92            | 0.71, 1.19 |                      |
| <b>Race</b>                               |                                           |          |                 |            |                      |
| White                                     | 237/2827                                  | 220/2769 | 1.03            | 0.86, 1.24 | 0.72                 |
| Asian                                     | 32/307                                    | 37/333   | 0.90            | 0.56, 1.44 |                      |
| Black/African-American                    | 35/194                                    | 30/217   | 1.31            | 0.80, 2.13 |                      |
| Other                                     | 23/166                                    | 19/166   | 1.16            | 0.63, 2.14 |                      |
| <b>Ethnicity</b>                          |                                           |          |                 |            |                      |
| Hispanic/Latino                           | 156/1227                                  | 142/1274 | 1.10            | 0.88, 1.38 | 0.52                 |
| Not Hispanic/Latino                       | 171/2267                                  | 164/2211 | 0.99            | 0.80, 1.23 |                      |
| <b>Region<sup>b</sup></b>                 |                                           |          |                 |            |                      |
| Europe + South Africa                     | 98/1473                                   | 98/1461  | 0.96            | 0.72, 1.27 | 0.82                 |
| North America                             | 51/593                                    | 43/587   | 1.19            | 0.79, 1.78 |                      |
| Latin America                             | 149/1156                                  | 134/1154 | 1.07            | 0.85, 1.36 |                      |
| Asia                                      | 29/272                                    | 31/283   | 0.96            | 0.58, 1.59 |                      |
| <b>Glycated hemoglobin<sup>*</sup></b>    |                                           |          |                 |            |                      |
| <8.0%                                     | 186/1915                                  | 158/1855 | 1.13            | 0.91, 1.40 | 0.26                 |
| ≥8.0%                                     | 141/1579                                  | 148/1630 | 0.94            | 0.75, 1.19 |                      |
| <b>Body mass index</b>                    |                                           |          |                 |            |                      |
| <30 kg/m <sup>2</sup>                     | 162/1516                                  | 135/1517 | 1.14            | 0.91, 1.43 | 0.27                 |
| ≥30 kg/m <sup>2</sup>                     | 165/1978                                  | 171/1965 | 0.96            | 0.77, 1.19 |                      |
| <b>Blood pressure control<sup>c</sup></b> |                                           |          |                 |            |                      |
| SBP ≥140 mmHg or<br>DBP ≥90 mmHg          | 222/1800                                  | 205/1834 | 1.08            | 0.89, 1.31 | 0.60                 |
| SBP <140 mmHg and<br>DBP <90 mmHg         | 105/1694                                  | 101/1651 | 0.99            | 0.75, 1.30 |                      |

|                                                                                            | Patients with event/<br>patients analyzed |          | Hazard<br>ratio | (95% CI)   | p-for<br>interaction |
|--------------------------------------------------------------------------------------------|-------------------------------------------|----------|-----------------|------------|----------------------|
|                                                                                            | Linagliptin                               | Placebo  |                 |            |                      |
| <b>All patients</b>                                                                        | 434/3493                                  | 420/3485 | 1.02            | 0.89, 1.17 |                      |
| <b>Estimated glomerular<br/>filtration rate<sup>d</sup></b>                                |                                           |          |                 |            |                      |
| ≥60 mL/min/1.73m <sup>2</sup>                                                              | 54/1294                                   | 38/1337  | 1.46            | 0.97, 2.21 | 0.36                 |
| ≥45 to <60<br>mL/min/1.73m <sup>2</sup>                                                    | 51/690                                    | 49/658   | 0.94            | 0.64, 1.39 |                      |
| ≥30 to <45<br>mL/min/1.73m <sup>2</sup>                                                    | 89/994                                    | 86/944   | 0.95            | 0.70, 1.27 |                      |
| <30 mL/min/1.73m <sup>2</sup>                                                              | 133/516                                   | 133/546  | 1.05            | 0.82, 1.33 |                      |
| <b>Urine albumin-to-<br/>creatinine ratio</b>                                              |                                           |          |                 |            |                      |
| <30 mg/g                                                                                   | 22/696                                    | 16/696   | 1.46            | 0.77, 2.79 | 0.24                 |
| 30 to 300 mg/g                                                                             | 53/1463                                   | 38/1431  | 1.30            | 0.86, 1.98 |                      |
| >300 mg/g                                                                                  | 252/1333                                  | 251/1357 | 0.97            | 0.81, 1.15 |                      |
| <b>Metformin</b>                                                                           |                                           |          |                 |            |                      |
| No                                                                                         | 212/1613                                  | 203/1558 | 0.99            | 0.82, 1.20 | 0.51                 |
| Yes                                                                                        | 115/1881                                  | 103/1927 | 1.11            | 0.85, 1.44 |                      |
| <b>Metformin-dose</b>                                                                      |                                           |          |                 |            |                      |
| ≤1500 mg                                                                                   | 53/787                                    | 39/792   | 1.29            | 0.85, 1.95 | 0.51                 |
| >1500 mg                                                                                   | 62/1094                                   | 64/1135  | 0.99            | 0.70, 1.40 |                      |
| Not on metformin                                                                           | 212/1613                                  | 203/1558 | 0.99            | 0.82, 1.20 |                      |
| <b>Sulfonylurea</b>                                                                        |                                           |          |                 |            |                      |
| No                                                                                         | 252/2392                                  | 220/2345 | 1.10            | 0.92, 1.32 | 0.21                 |
| Yes                                                                                        | 75/1102                                   | 86/1140  | 0.87            | 0.64, 1.19 |                      |
| <b>Insulin</b>                                                                             |                                           |          |                 |            |                      |
| No                                                                                         | 101/1487                                  | 94/1542  | 1.08            | 0.82, 1.43 | 0.69                 |
| Yes                                                                                        | 226/2007                                  | 212/1943 | 1.01            | 0.84, 1.22 |                      |
| <b>Lipidlowering drugs</b>                                                                 |                                           |          |                 |            |                      |
| No                                                                                         | 101/871                                   | 82/839   | 1.13            | 0.85, 1.52 | 0.48                 |
| Yes                                                                                        | 226/2623                                  | 224/2646 | 1.00            | 0.83, 1.20 |                      |
| <b>Angiotensin-converting<br/>enzyme inhibitors/<br/>angiotensin receptor<br/>blockers</b> |                                           |          |                 |            |                      |
| No                                                                                         | 62/634                                    | 69/687   | 0.96            | 0.68, 1.36 | 0.61                 |
| Yes                                                                                        | 265/2860                                  | 237/2798 | 1.07            | 0.89, 1.27 |                      |
| <b>Calcium channel<br/>blockers (CCB)</b>                                                  |                                           |          |                 |            |                      |
| No                                                                                         | 155/2061                                  | 147/2039 | 1.03            | 0.82, 1.29 | 0.87                 |
| Yes                                                                                        | 172/2860                                  | 159/2798 | 1.05            | 0.85, 1.31 |                      |
| <b>Beta blockers</b>                                                                       |                                           |          |                 |            |                      |
| No                                                                                         | 161/1414                                  | 142/1412 | 1.14            | 0.91, 1.42 | 0.30                 |
| Yes                                                                                        | 166/2080                                  | 164/2073 | 0.97            | 0.78, 1.20 |                      |

|                                                                                                                                                                                                                  | Patients with event/<br>patients analyzed |          | Hazard<br>ratio | (95% CI)   | p-for<br>interaction |
|------------------------------------------------------------------------------------------------------------------------------------------------------------------------------------------------------------------|-------------------------------------------|----------|-----------------|------------|----------------------|
|                                                                                                                                                                                                                  | Linagliptin                               | Placebo  |                 |            |                      |
| <b>All patients</b>                                                                                                                                                                                              | 434/3493                                  | 420/3485 | 1.02            | 0.89, 1.17 |                      |
| <b>Diuretics</b>                                                                                                                                                                                                 |                                           |          |                 |            |                      |
| No                                                                                                                                                                                                               | 129/1602                                  | 117/1549 | 1.06            | 0.82, 1.36 | 0.91                 |
| Yes                                                                                                                                                                                                              | 198/1892                                  | 189/1936 | 1.04            | 0.85, 1.26 |                      |
| <b>Antiplatelet drugs</b>                                                                                                                                                                                        |                                           |          |                 |            |                      |
| No                                                                                                                                                                                                               | 131/1102                                  | 102/1084 | 1.25            | 0.97, 1.62 | 0.08                 |
| Yes                                                                                                                                                                                                              | 196/2392                                  | 204/2401 | 0.94            | 0.77, 1.14 |                      |
| <b>History of heart failure</b>                                                                                                                                                                                  |                                           |          |                 |            |                      |
| No                                                                                                                                                                                                               | 252/2542                                  | 230/2564 | 1.07            | 0.90, 1.28 | 0.52                 |
| Yes                                                                                                                                                                                                              | 75/952                                    | 76/921   | 0.95            | 0.69, 1.31 |                      |
| <b>Duration of type 2 diabetes</b>                                                                                                                                                                               |                                           |          |                 |            |                      |
| ≤ 5 years                                                                                                                                                                                                        | 41/521                                    | 22/553   | 1.97            | 1.17, 3.30 | 0.04                 |
| >5 to <10 years                                                                                                                                                                                                  | 56/699                                    | 55/688   | 0.94            | 0.65, 1.37 |                      |
| ≥10 years                                                                                                                                                                                                        | 230/2277                                  | 229/2244 | 0.97            | 0.81, 1.17 |                      |
| <b>CKD prognosis by KDIGO<sup>e</sup></b>                                                                                                                                                                        |                                           |          |                 |            |                      |
| Low                                                                                                                                                                                                              | 8/232                                     | 2/252    | NC*             | NC*        | NC*                  |
| Medium                                                                                                                                                                                                           | 14/766                                    | 17/795   | NC*             | NC*        |                      |
| High                                                                                                                                                                                                             | 57/995                                    | 37/905   | NC*             | NC*        |                      |
| Very high                                                                                                                                                                                                        | 248/1499                                  | 250/1533 | NC*             | NC*        |                      |
| <b>Cardiorenal risk by combinations of macrovascular disease, albuminuria and eGFR<sup>f</sup></b>                                                                                                               |                                           |          |                 |            |                      |
| Cat A                                                                                                                                                                                                            | 38/1361                                   | 31/1367  | 1.22            | 0.76, 1.96 | 0.44                 |
| Cat B                                                                                                                                                                                                            | 51/394                                    | 50/345   | 0.79            | 0.53, 1.16 |                      |
| Cat C                                                                                                                                                                                                            | 23/253                                    | 15/270   | 1.53            | 0.80, 2.94 |                      |
| Cat D                                                                                                                                                                                                            | 180/1153                                  | 176/1156 | 1.01            | 0.82, 1.24 |                      |
| Cat E                                                                                                                                                                                                            | 35/309                                    | 33/303   | 1.04            | 0.64, 1.67 |                      |
| <b>Cardiorenal risk</b>                                                                                                                                                                                          |                                           |          |                 |            |                      |
| Albuminuria and previous macrovascular disease without established renal disease                                                                                                                                 | 38/1361                                   | 31/1367  | 1.22            | 0.76, 1.95 | 0.75                 |
| Established renal disease (eGFR 15 - <45 mL/min/1.73 m <sup>2</sup> with any UACR mg/g or eGFR ≥45-75 mL/min/ 1.73 m <sup>2</sup> with an UACR >200 mg/g) without previous macrovascular and albuminuria disease | 215/1462                                  | 209/1459 | 1.01            | 0.84, 1.23 |                      |
| Albuminuria and previous macrovascular disease plus established renal disease (eGFR 45-75 mL/min/1.73 m <sup>2</sup> with an UACR >200 mg/g or eGFR 15 - <45 mL/min/1.73 m <sup>2</sup> with any UACR mg/g)      | 74/647                                    | 65/615   | 0.99            | 0.71, 1.38 |                      |

|                                                                                                                           | Patients with event/<br>patients analyzed |          | Hazard<br>ratio | (95% CI)   | p-for<br>interaction |
|---------------------------------------------------------------------------------------------------------------------------|-------------------------------------------|----------|-----------------|------------|----------------------|
|                                                                                                                           | Linagliptin                               | Placebo  |                 |            |                      |
| <b>All patients</b>                                                                                                       | 434/3493                                  | 420/3485 | 1.02            | 0.89, 1.17 |                      |
| <b>Established renal disease<sup>g</sup></b>                                                                              |                                           |          |                 |            |                      |
| Yes                                                                                                                       | 289/2109                                  | 274/2074 | 1.00            | 0.85, 1.18 | 0.48                 |
| No                                                                                                                        | 38/1385                                   | 32/1411  | 1.20            | 0.75, 1.91 |                      |
| <b>Established macrovascular<br/>disease and albuminuria</b>                                                              |                                           |          |                 |            |                      |
| Yes                                                                                                                       | 112/2008                                  | 96/1982  | 1.11            | 0.85, 1.46 | 0.63                 |
| No                                                                                                                        | 215/1486                                  | 210/1503 | 1.03            | 0.85, 1.24 |                      |
| <b>Prevalent kidney disease<br/>(eGFR &lt; 60 mL/min/1.73m<sup>2</sup> or<br/>macroalbuminuria UACR &gt;300<br/>mg/g)</b> |                                           |          |                 |            |                      |
| Yes                                                                                                                       | 308/2606                                  | 291/2541 | 0.99            | 0.85, 1.17 | 0.38                 |
| No                                                                                                                        | 19/887                                    | 15/944   | 1.36            | 0.69, 2.67 |                      |

Cox regression analysis in patients treated with  $\geq 1$  dose of study drug. Subgroup factors were pre-specified for the key secondary kidney outcome. For the test of homogeneity of the treatment group difference among subgroups (test for group by covariate interaction) no adjustment for multiple tests were performed. \*: NC – not calculated owing to few events in some subgroups (<14).

<sup>a</sup>: consistent results in the additional prespecified age subgroups <65, 65-75 and  $\geq 75$  years (p-for interaction 1.00),

<sup>b</sup>: an additional prespecified regional subgroup analyses (Japan, non-Japan) involved too few events to be analysed,

<sup>c</sup>: consistent results in the additional prespecified BP subgroups: SBP < 140 and  $\geq 140$  mmHg (p-for interaction

0.37) and < 160 and  $\geq 160$  (p-for interaction 0.81) mmHg, <sup>d</sup>: consistent results in the additional prespecified

eGFR subgroups < 60 and  $\geq 60$  ml/min/1.73m<sup>2</sup> (p-for interaction 0.06), <sup>e</sup>: Per 2012 KDIGO criteria; Low risk

defined as eGFR  $\geq 60$  ml/min/1.73m<sup>2</sup> and UACR <30 mg/g, Moderately increased risk defined as eGFR 45–59

ml/min/1.73m<sup>2</sup> and UACR <30 mg/g, or eGFR  $\geq 60$  ml/min/1.73m<sup>2</sup> and UACR 30–300 mg/g, High risk defined as

eGFR 30–44 ml/min/1.73m<sup>2</sup> and UACR <30 mg/g, eGFR 45–59 ml/min/1.73m<sup>2</sup> and UACR 30–300 mg/g, or eGFR

$\geq 60$  and UACR >300 mg/g, Very high risk defined as eGFR <30 ml/min/1.73m<sup>2</sup> with any UACR, eGFR 30–44 and

UACR 30–300 mg/g, or eGFR 45–59 ml/min/1.73m<sup>2</sup> and UACR >300 mg/g, <sup>f</sup>: A) albuminuria and previous

macrovascular disease without evidence of impaired renal function, B) albuminuria and previous macrovascular

disease plus renal impairment (eGFR 15–<45 mL/min/1.73 m<sup>2</sup> with any UACR mg/g), C) albuminuria and previous

macrovascular disease plus renal impairment (eGFR  $\geq 45$ -75 mL/min/1.73 m<sup>2</sup> with an UACR >200 mg/g), D) impaired

renal function (eGFR 15–<45 mL/min/1.73 m<sup>2</sup> with any UACR), E) impaired Renal function (eGFR  $\geq 45$ -75

mL/min/1.73 m<sup>2</sup> with an UACR >200 mg/g), <sup>g</sup>: patients in the “yes” category fulfils any one of the categories:

albuminuria and previous macrovascular disease plus renal impairment (eGFR 15 – <45mL/min/1.73m<sup>2</sup> with any

UACR), albuminuria and previous macrovascular disease plus renal impairment (eGFR 45-75 mL/min/1.73 m<sup>2</sup> with

an UACR >200 mg/g), impaired renal function (eGFR 15- <45 mL/min/1.73 m<sup>2</sup> with any UACR mg/g), impaired renal

function (eGFR 45-75 mL/min/1.73 m<sup>2</sup> with UACR >200 mg/g).



## eAppendix 10. Exploratory CV Analyses

**eFigure 4. Time to First occurrence of CV Death. Median (1<sup>st</sup>, 3<sup>rd</sup> quartile) time in study (years): Linagliptin 2.2 (1.6, 3.0) and Placebo 2.2 (1.6, 3.0).**

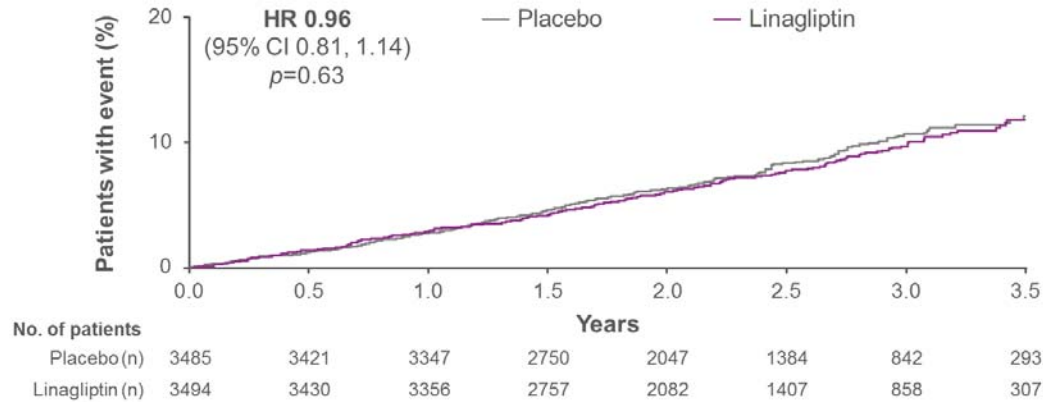

**eFigure 5. Time to First Occurrence of All-cause Death. Median (1<sup>st</sup>, 3<sup>rd</sup> quartile) time in study (years): Linagliptin 2.2 (1.6, 3.0) and Placebo 2.2 (1.6, 3.0).**

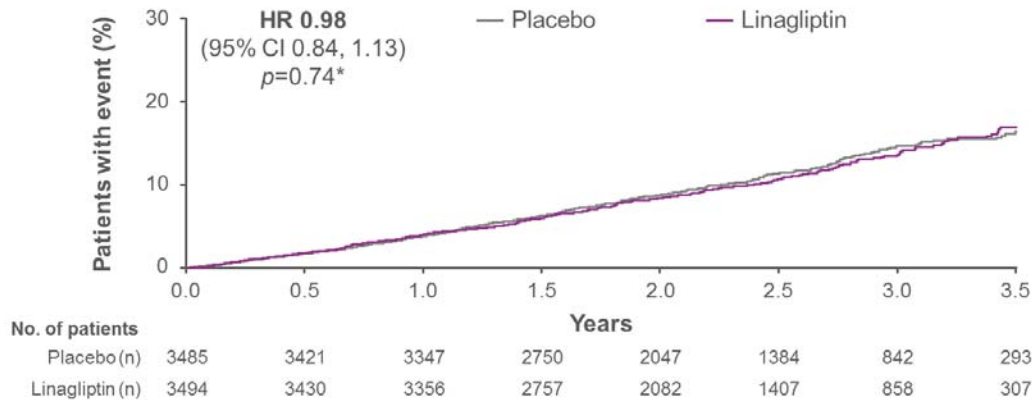

**eFigure 6. Time to First Occurrence of Hospitalization for Heart Failure. Median (1<sup>st</sup>, 3<sup>rd</sup> quartile) time in study (years): Linagliptin 2.2 (1.6, 3.0) and Placebo 2.2 (1.6, 3.0).**

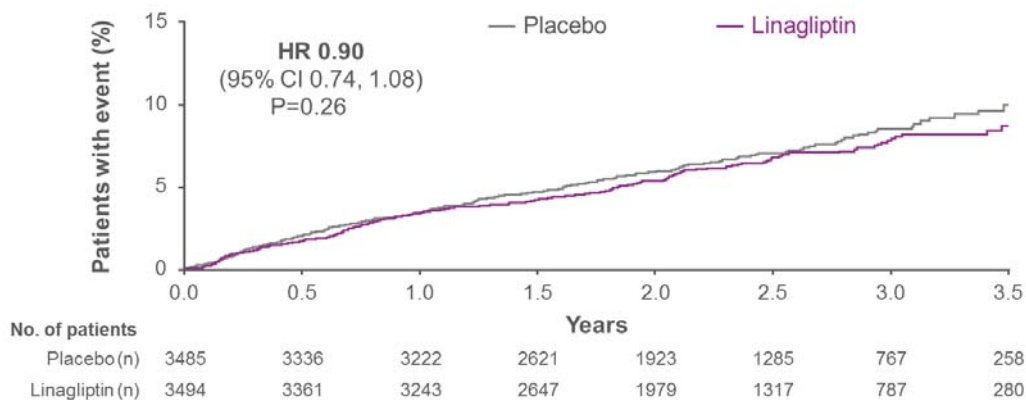

## eAppendix 11. Exploratory Kidney and Microvascular Analyses

**eFigure 7. Time to First Occurrence of renal death or sustained end stage kidney disease. Median (1<sup>st</sup>, 3<sup>rd</sup> quartile) time in study (years): Linagliptin 2.2 (1.6, 3.0) and Placebo 2.2 (1.6, 3.0).**

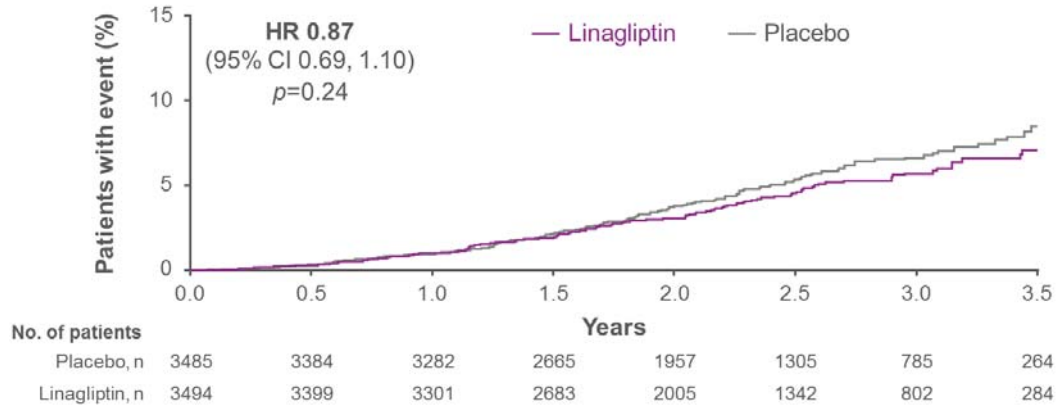

**eFigure 8. Time to First Occurrence of Albuminuria Progression. Median (1<sup>st</sup>, 3<sup>rd</sup> quartile) time in study (years): Linagliptin 2.2 (1.6, 3.0) and Placebo 2.2 (1.6, 3.0).**

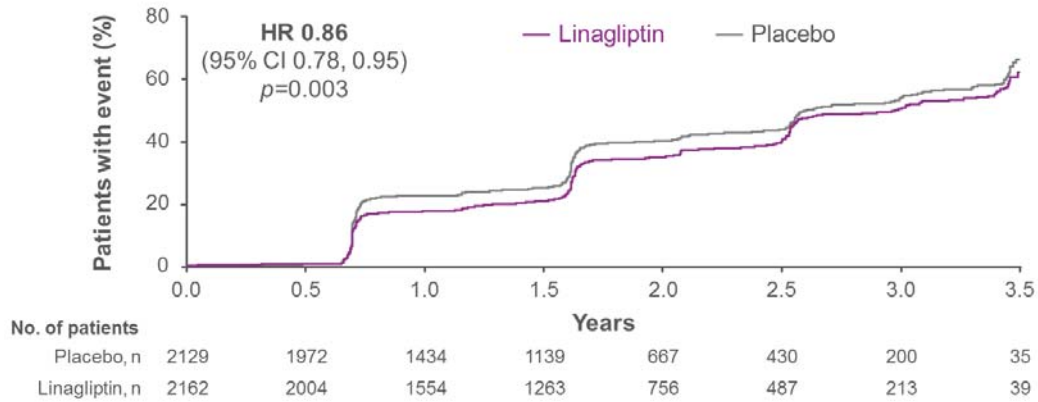

**eFigure 9. Time to First Occurrence of Composite Microvascular Endpoint\*. Median (1<sup>st</sup>, 3<sup>rd</sup> quartile) time in study (years): Linagliptin 2.2 (1.6, 3.0) and Placebo 2.2 (1.6, 3.0).**

\*Sustained ESKD, sustained decrease of  $\geq 50\%$  in eGFR, death from renal failure, albuminuria progression, retinal photocoagulation or intravitreal injection of an anti-vascular endothelial growth factor (VEGF) therapy for diabetic retinopathy, vitreous haemorrhage or diabetes-related blindness. Treated set, Kaplan-Meier estimate. Hazard ratio and 95% CI based on Cox regression model with terms for treatment group and region. 2-sided  $p$ -value

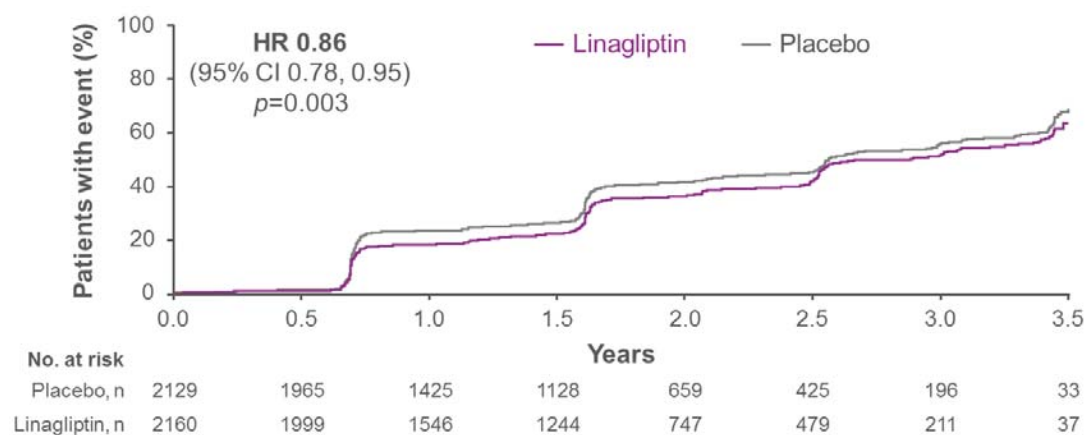

**eTable 4. Distribution of events contributing to the composite microvascular outcome**

|                                                                                         | <b>Linagliptin<br/>(n=3494) (%)</b> | <b>Placebo<br/>(n=3485) (%)</b> |
|-----------------------------------------------------------------------------------------|-------------------------------------|---------------------------------|
| Number with events                                                                      | 785 (22.5)                          | 843 (24.2)                      |
| <i>Kidney components</i>                                                                |                                     |                                 |
| Patients with renal death                                                               | 0                                   | 0                               |
| Patients with sustained ESKD                                                            | 10 (0.3)                            | 8 (0.2)                         |
| Patients with sustained >50% eGFR decrease                                              | 21 (0.6)                            | 14 (0.4)                        |
| Patients with albuminuria progression                                                   | 745 (21.3)                          | 810 (23.2)                      |
| <i>Ocular components</i>                                                                |                                     |                                 |
| Patients with retinal laser coagulation or anti-VEGF injection for diabetic retinopathy | 8 (0.2)                             | 9 (0.3)                         |
| Patients with vitreous haemorrhage                                                      | 4 (0.1)                             | 5 (0.1)                         |
| Patients with diabetes related blindness                                                | 0                                   | 0                               |

**eTable 5. Distribution of events contributing to the composite ocular outcome**

|                                                            | <b>Linagliptin<br/>(n=3494) (%)</b> | <b>Placebo<br/>(n=3485) (%)</b> |
|------------------------------------------------------------|-------------------------------------|---------------------------------|
| Number with events                                         | 36 (1.0)                            | 49 (1.4)                        |
| Patients with retinal laser coagulation                    | 7 (0.2)                             | 11 (0.3)                        |
| Patients with anti-VEGF injection for diabetic retinopathy | 10 (0.3)                            | 11 (0.3)                        |
| Patients with vitreous haemorrhage                         | 18 (0.5)                            | 27 (0.8)                        |
| Patients with diabetes related blindness                   | 2 (0.1)                             | 2 (0.1)                         |

## eAppendix 12. Hypoglycemia Incidence Rates Overall and in Subgroups at Elevated Hypoglycaemia Risk

Shown are incidence rates (95% confidence intervals) of any investigator reported hypoglycemic event, investigator reported hypoglycemic event with plasma glucose <54 mg/dl or severe event, or severe hypoglycemic events. Severe events defined as events requiring assistance of another person to actively administer carbohydrate, glucagon or other resuscitative actions

**eFigure 10. Hypoglycemia (investigator reported) incidence rate (95% CI) in the overall population by severity and treatment group.**

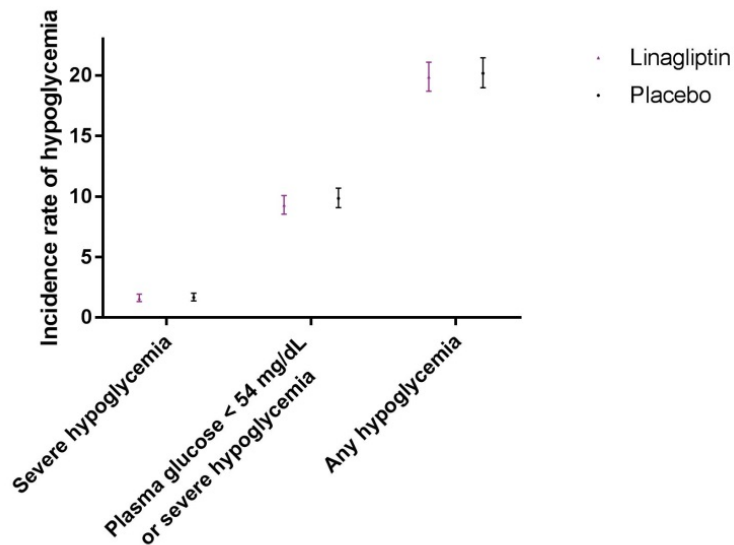

**eFigure 11. Hypoglycemia (investigator reported) incidence rate (95% CI) in subgroups at elevated hypoglycemia risk by severity and treatment group.**

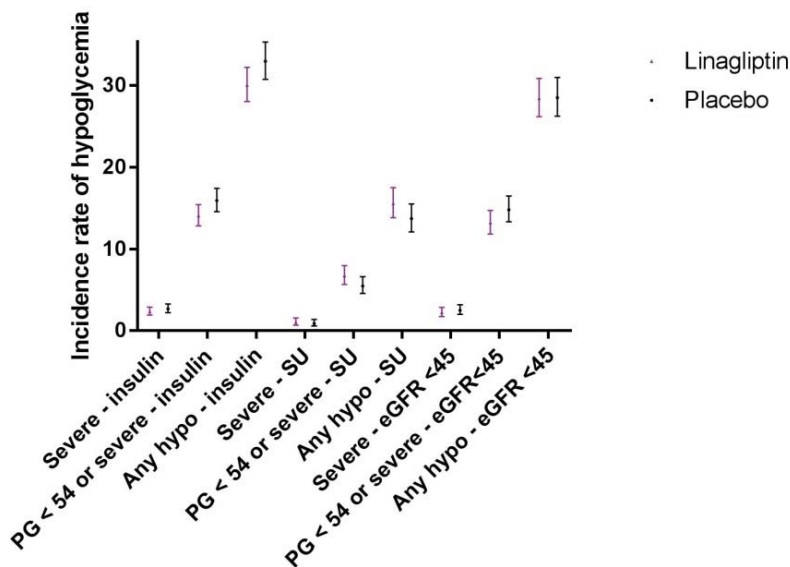

## eAppendix 13. Post-baseline Introduction of New Glucose-Lowering and CV Therapies

### eFigure 12. New introduction of glucoselowering therapies post-baseline by treatment groups.

Shown are percentage (95% confidence interval) of patients with glucose-lowering medication initiated after first trial administration and without previous (either ongoing or discontinued) prescription of the same preferred name according to standardized drug groupings. Dose increases are not considered. Hazard ratios (HR) for time to first initiation of the corresponding antidiabetic medication are based on a Cox regression model,

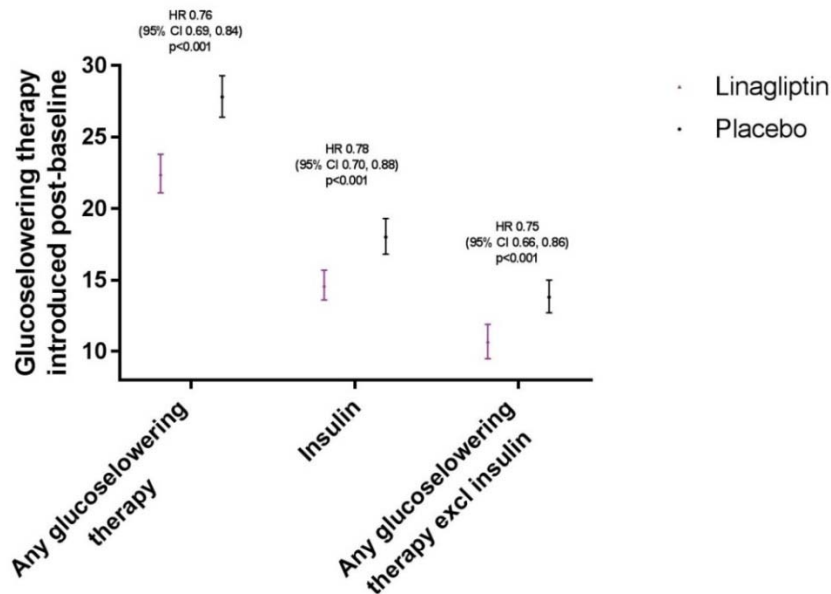

### eFigure 13. Initiation or dose increase of insulin by treatment groups. Median (1<sup>st</sup>, 3<sup>rd</sup> quartile) time in study (years): Linagliptin 2.2 (1.6, 3.0) and Placebo 2.2 (1.6, 3.0).

Kaplan-Meier estimates and HR (95% confidence interval) for time to initiation or dose increase of insulin. Initiation of insulin was considered if continuous period of insulin  $\geq 3$  months. Insulin dose increase was defined as an increase for at least 3 months of  $>50\%$ ;  $>30\%$ ;  $>20\%$  for patients with baseline daily insulin dose of  $\leq 10$  units;  $>10$  and  $\leq 20$  units;  $> 20$  units, respectively.

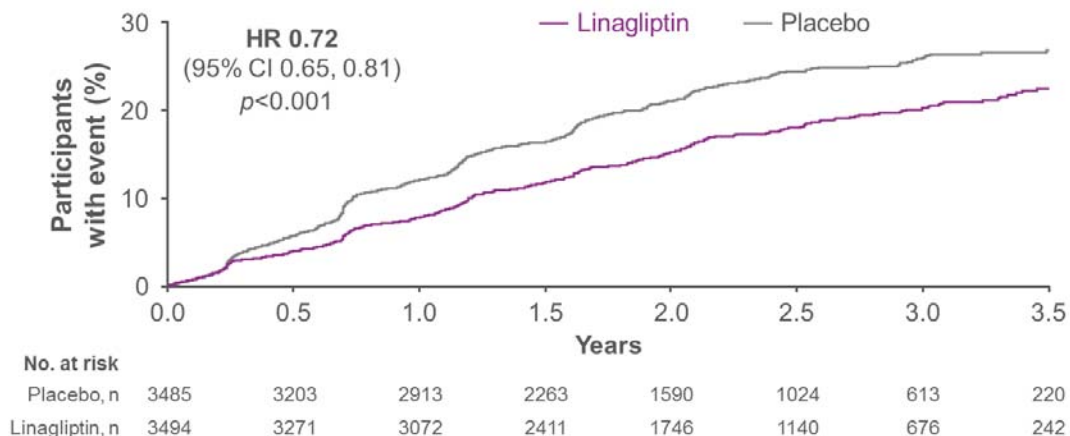

**eTable 6. Post-baseline introduction of new glucose-lowering therapies according to standardized drug groupings by treatment groups.**

Shown are percentage (95% confidence interval) of patients with glucose-lowering medication initiated after first trial administration and without previous (either ongoing or discontinued) prescription of the same preferred name according to standardized drug groupings. Dose increases are not considered

|                          | Linagliptin (N = 3494)  | Placebo (N = 3485)      |
|--------------------------|-------------------------|-------------------------|
|                          | no. (% [95% CI])        |                         |
| α-glucosidase inhibitors | 24 (0.7 [0.5, 1.0])     | 32 (0.9 [0.7, 1.3])     |
| DPP-4 inhibitors         | 64 (1.8 [1.4, 2.3])     | 83 (2.4 [1.9, 2.9])     |
| GLP-1 receptor agonists  | 14 (0.4 [0.2, 0.7])     | 23 (0.7 [0.4, 1.0])     |
| Insulins                 | 509 (14.6 [13.4, 15.8]) | 628 (18.0 [16.8, 19.3]) |
| Meglitinides             | 13 (0.4 [0.2, 0.6])     | 28 (0.8 [0.6, 1.2])     |
| Metformin                | 100 (2.9 [2.4, 3.5])    | 127 (3.6 [3.1, 4.3])    |
| SGLT-2 inhibitors        | 25 (0.7 [0.5, 1.1])     | 29 (0.8 [0.6, 1.2])     |
| Sulfonylurea             | 158 (4.5 [3.9, 5.3])    | 220 (6.3 [5.6, 7.2])    |
| Thiazolidinedione        | 23 (0.7 [0.4, 1.0])     | 28 (0.8 [0.6, 1.2])     |
| Other therapies          | 10 (0.3 [0.2, 0.5])     | 8 (0.2 [0.1, 0.5])      |

**eTable 7. Post-baseline introduction of cardiovascular therapies according to standardized drug groupings by treatment groups.**

|                                        | Linagliptin (N = 3494) | Placebo (N = 3485) |
|----------------------------------------|------------------------|--------------------|
|                                        | no. (%)                |                    |
| Anti-hypertensive therapy              | 1188 (34.0)            | 1231 (35.3)        |
| ACEi/ARB                               | 496 (14.2)             | 521 (14.9)         |
| ACE inhibitors                         | 256 (7.3)              | 239 (6.9)          |
| ARB                                    | 291 (8.3)              | 319 (9.2)          |
| Renin inhibitors                       | 2 (0.1)                | 0 (0.0)            |
| Diuretics                              | 634 (18.1)             | 657 (18.9)         |
| Loop or high ceiling diuretics         | 382 (10.9)             | 381 (10.9)         |
| Mineralocorticoid receptor antagonists | 151 (4.3)              | 131 (3.8)          |
| Other diuretics                        | 267 (7.6)              | 275 (7.9)          |
| Beta blockers                          | 360 (10.3)             | 381 (10.9)         |
| Calcium channel blockers               | 434 (12.4)             | 392 (11.2)         |
| Other                                  | 271 (7.8)              | 284 (8.1)          |
| Lipid-lowering drugs                   | 499 (14.3)             | 499 (14.3)         |
| Statins                                | 395 (11.3)             | 393 (11.3)         |
| Fibrates                               | 82 (2.3)               | 87 (2.5)           |
| Ezetimibe                              | 37 (1.1)               | 29 (0.8)           |
| Niacin                                 | 3 (0.1)                | 2 (0.1)            |
| Other                                  | 39 (1.1)               | 39 (1.1)           |

|                                                     | <b>Linagliptin (N = 3494)</b> | <b>Placebo (N = 3485)</b> |
|-----------------------------------------------------|-------------------------------|---------------------------|
|                                                     | <b>no. (%)</b>                |                           |
| Acetylsalicylic acid (ASA)                          | 170 (4.9)                     | 164 (4.7)                 |
| Other platelet inhibitors and antithrombotic agents | 393 (11.2)                    | 406 (11.6)                |
| Platelet inhibitors excluding ASA and heparin       | 234 (6.7)                     | 262 (7.5)                 |
| Clopidogrel                                         | 151 (4.3)                     | 177 (5.1)                 |
| Dipyridamole                                        | 4 (0.1)                       | 4 (0.1)                   |
| Other                                               | 95 (2.7)                      | 104 (3.0)                 |
| Vitamin K antagonists                               | 77 (2.2)                      | 71 (2.0)                  |
| Direct factor Xa inhibitors                         | 74 (2.1)                      | 77 (2.2)                  |
| Direct thrombin inhibitors                          | 13 (0.4)                      | 13 (0.4)                  |

Data are from patients treated with  $\geq 1$  dose of study drug. ACE: angiotensin-converting enzyme inhibitor; ARB: angiotensin receptor blocker



## eAppendix 14. Exploratory CV and Renal Risk Factor Analysis

Continuous variables were analysed using mixed-effect model for repeated measures with randomized treatment, region, week, treatment by week interaction, and linear covariates of baseline measurement and baseline by week interaction as factors. An unstructured variance-covariance matrix was specified for the within-subject covariance between weeks. In case of non-convergence, an autoregressive(1) covariance matrix was applied.

**eFigure 14. Weight over time by treatment groups. Median (1<sup>st</sup>, 3<sup>rd</sup> quartile) time in study (years): Linagliptin 2.2 (1.6, 3.0) and Placebo 2.2 (1.6, 3.0).**

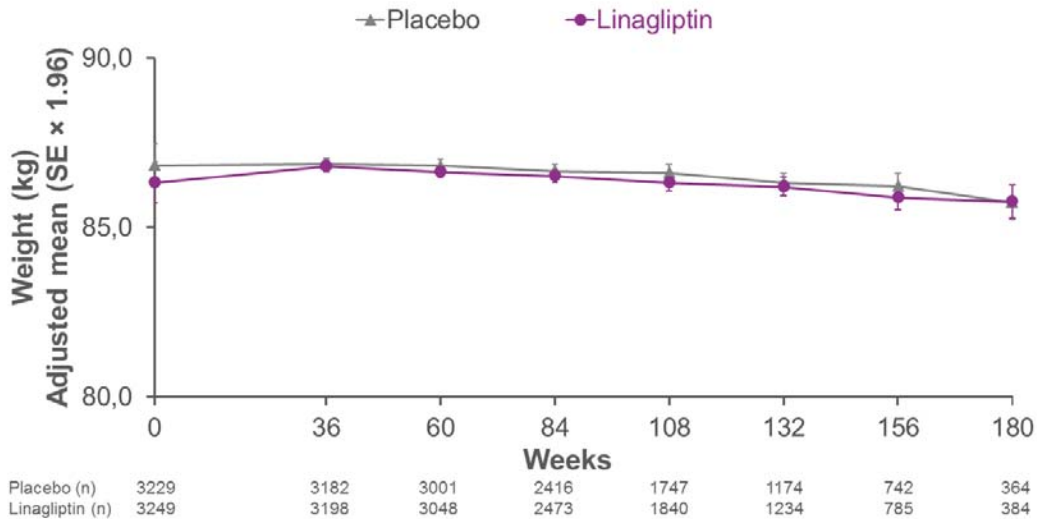

**eFigure 15 Blood pressure over time by treatment groups. Median (1<sup>st</sup>, 3<sup>rd</sup> quartile) time in study (years): Linagliptin 2.2 (1.6, 3.0) and Placebo 2.2 (1.6, 3.0).** (†n=3362 for DBP; ‡n=3210 for DBP; §n=3011 for DBP; ¶n=3064 for DBP)

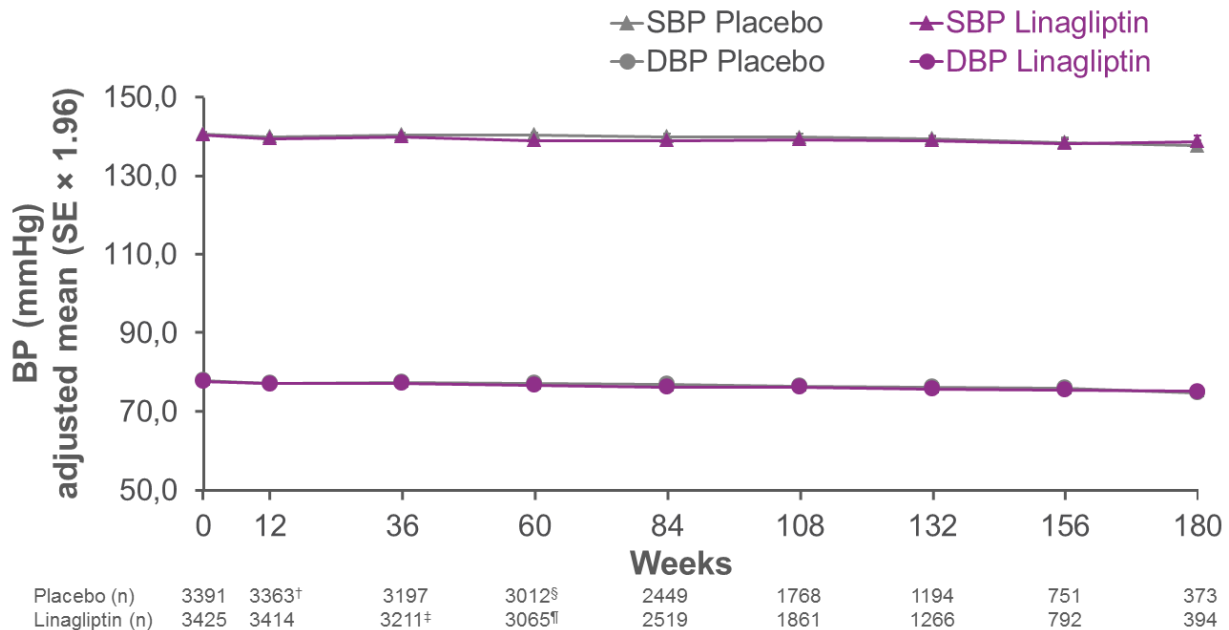

**eFigure 16. Low density lipoprotein cholesterol over time by treatment groups. Median (1<sup>st</sup>, 3<sup>rd</sup> quartile) time in study (years): Linagliptin 2.2 (1.6, 3.0) and Placebo 2.2 (1.6, 3.0).**

Conversion factor: 1 mg/dL = 0.02586 mmol/L

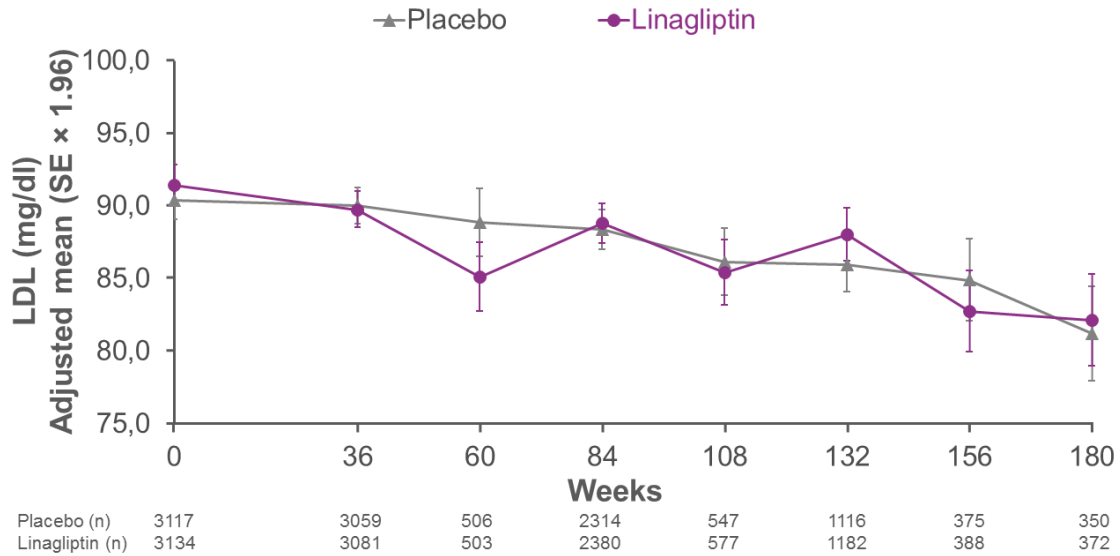

**eFigure 17. High density lipoprotein cholesterol over time by treatment groups. Median (1<sup>st</sup>, 3<sup>rd</sup> quartile) time in study (years): Linagliptin 2.2 (1.6, 3.0) and Placebo 2.2 (1.6, 3.0).**

Conversion factor: 1 mg/dL = 0.02586 mmol/L

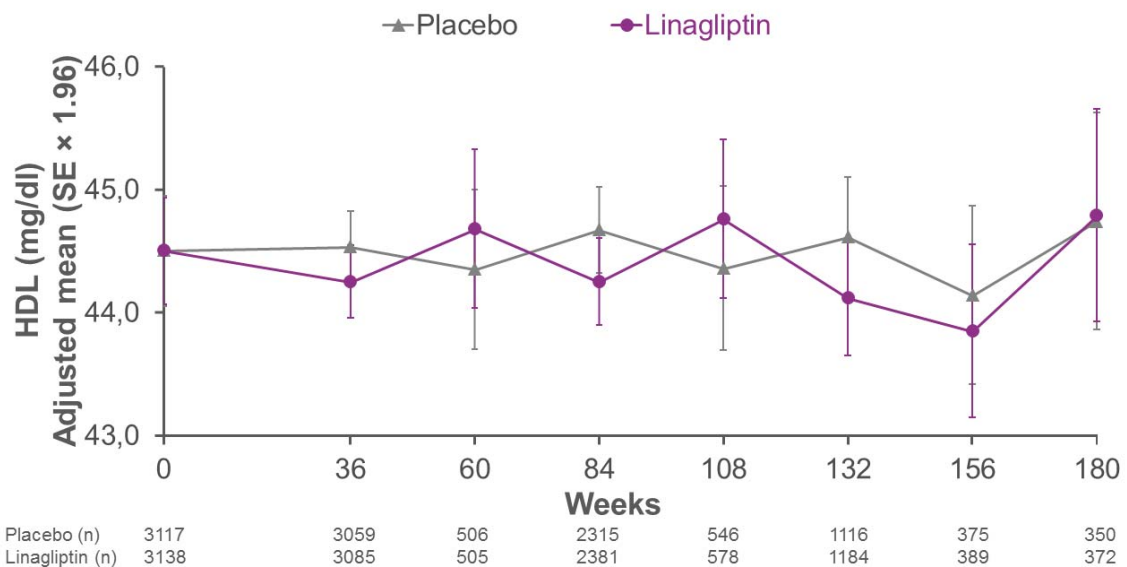

## **eAppendix 15. Endpoints prespecified in the statistical analysis plans of CARMELINA**

### **Primary endpoint**

The primary endpoint is time to the first occurrence of any of the following by adjudication confirmed components of the primary composite endpoint (3-point major adverse cardiovascular events (MACE)): CV death, non-fatal MI or non-fatal stroke.

### **Key secondary endpoint**

The key secondary endpoint is time to the first occurrence of any of the following by adjudication confirmed components: renal death, sustained end stage renal disease (ESRD) or sustained decrease of 40% or more in eGFR from baseline. This endpoint will also be further referred to as composite renal endpoint 1.

### **Tertiary endpoints:**

#### **Endpoints analyzed as time to event endpoints:**

- CV death, non-fatal MI, non-fatal stroke or hospitalisation for unstable angina pectoris (4-point MACE)
- CV death
- Fatal or non-fatal MI
- Fatal MI
- Non-fatal MI
- Fatal or non-fatal stroke
- Fatal stroke
- Non-fatal stroke
- Hospitalisation for unstable angina pectoris
- Stent thrombosis
- Transient ischemic attack (TIA)
- All-cause mortality
- Coronary revascularization procedures (CABG or PCI)
- Occurrence of and time to first occurrence of any of the following components of overall mortality, non-fatal MI, non-fatal stroke

- Occurrence of and time to first occurrence of any of the following components of overall mortality, non-fatal MI, non-fatal stroke, hospitalization for unstable angina pectoris
- Occurrence of and time to first occurrence of any of the following components of overall mortality, non-fatal MI, non-fatal stroke, hospitalization for unstable angina pectoris and hospitalisation for heart failure
- Occurrence of and time to first occurrence of the composite cerebrovascular endpoint defined as stroke (fatal or non-fatal) or TIA
- Occurrence of and time to first occurrence of any adjudicated cardiovascular endpoint or all-cause mortality (all-cause mortality, MI (fatal or non-fatal), stroke (fatal or non-fatal), TIA, hospitalisation for unstable angina, hospitalisation for heart failure, stent thrombosis, coronary revascularization procedures (CABG or PCI)).
- Hospitalisation for peripheral revascularization
- Hospitalisation for heart failure
- CV death or hospitalisation for heart failure
- Occurrence of and time to first occurrence of any of the following components of CV death, non-fatal MI, non-fatal stroke and hospitalisation for heart failure
- occurrence of and time to first occurrence of any of the following components of CV death, non-fatal MI, non-fatal stroke, hospitalization for unstable angina pectoris and hospitalisation for heart failure
- Composite renal endpoint 2 (renal death, sustained ESRD or sustained decrease of 50% or more in eGFR from baseline)
- Composite renal endpoint 3 (renal death, sustained ESRD or sustained decrease of 30% or more in eGFR (MDRD) from baseline accompanied by eGFR (MDRD) <60 ml/min/m<sup>2</sup>)
- Sustained decrease of 30% or more in eGFR (MDRD) from baseline accompanied by eGFR (MDRD) <60 ml/min/m<sup>2</sup>
- Composite renal endpoint 4 with all-cause mortality, defined as any of the following components:
  - Sustained\* macroalbuminuria
  - Sustained decrease of 40% or more in eGFR from baseline
  - Sustained ESRD
  - All-cause mortality

- Composite renal endpoint 5, defined as any of the following components:
  - Sustained\* macroalbuminuria
  - Sustained decrease of 40% or more in eGFR from baseline
  - Sustained ESRD
  - Renal death
  - CV death
- Composite renal endpoint 6, defined as any of the following components:
  - Sustained decrease of 40% or more in eGFR from baseline
  - Sustained ESRD
  - All-cause mortality
- Composite renal endpoint 7, defined as any of the following components:
  - Sustained decrease of 40% or more in eGFR from baseline
  - Sustained ESRD
  - Renal death
  - CV death
- Composite renal endpoint 8, defined as any of the following components:
  - Sustained\* macroalbuminuria
  - Sustained decrease of 50% or more in eGFR from baseline
  - Sustained ESRD
  - All-cause mortality
- Composite renal endpoint 9, defined as any of the following components:
  - Sustained\* macroalbuminuria
  - Sustained decrease of 50% or more in eGFR from baseline
  - Sustained ESRD
  - Renal death
  - CV death
- Composite renal endpoint 10, defined as any of the following components:
  - Sustained decrease of 50% or more in eGFR from baseline
  - Sustained ESRD
  - All-cause mortality
- Composite renal endpoint 11, defined as any of the following components:
  - Sustained decrease of 50% or more in eGFR from baseline
  - Sustained ESRD
  - Renal death
  - CV death

- Composite renal endpoint 12, defined as any of the following components:
  - Sustained\* eGFR (MDRD) <15 ml/min/m<sup>2</sup>
  - Sustained ESRD
  - Renal death
- Composite renal endpoint 13, defined as any of the following components:
  - sustained\* eGFR (MDRD) <15 ml/min/m<sup>2</sup>
  - Sustained ESRD
  - Renal death
  - CV death
- Composite renal endpoint 14, defined as any of the following components:
  - Sustained\* eGFR (MDRD) <10 ml/min/m<sup>2</sup>
  - Sustained ESRD
  - Renal death
- Renal composite outcome 15, defined as any of the following components:
  - Sustained\* eGFR (MDRD) <10 ml/min/m<sup>2</sup>
  - sustained ESRD
  - Renal death
  - CV death
- Renal composite outcome 16, defined as any of the following components:
  - Sustained decrease of 40% or more in eGFR from baseline
  - Sustained\* eGFR (MDRD) <10 ml/min/m<sup>2</sup>
  - sustained ESRD
  - Renal death
  - CV death
- Composite renal endpoint 17, defined as any of the following components:
  - Sustained\* increase of serum creatinine  $\geq$  2-fold from baseline, accompanied by an estimated glomerular filtration rate (eGFR) of < 60 mL/min/1.73m<sup>2</sup> (MDRD)
  - Sustained ESRD
  - Renal death
- Composite renal endpoint 18, defined as any of the following components:
  - Sustained\* increase of serum creatinine  $\geq$  2-fold from baseline, accompanied by an estimated glomerular filtration rate (eGFR) of < 60 mL/min/1.73m<sup>2</sup> (MDRD)
  - Sustained ESRD
  - Renal death

- CV death

- Sustained decrease of 50% or more in eGFR from baseline
- Sustained decrease of 40% or more in eGFR from baseline
- Sustained ESRD or renal death
- Renal death
- Renal death, sustained ESRD or CV death
- New incidence of macroalbuminuria defined as Urinary Albumin-to-Creatinine Ratio (UACR) > 300 mg/g at any post baseline measurement
- Sustained\* progression of albuminuria (defined as change from normal albuminuria at baseline to micro- or macroalbuminuria or as change from microalbuminuria to macroalbuminuria).
- Onset of sustained macroalbuminuria, defined as UACR > 300 mg/g in patients with normo- or microalbuminuria at baseline
- Onset of sustained microalbuminuria, defined as UACR  $\geq$  30 mg/g.
- Sustained\* regression to normal albuminuria defined as UACR < 30 mg/g in patients with micro- or macroalbuminuria at baseline (improvement)
- Sustained\* regression to normo- or microalbuminuria in patients with macroalbuminuria at baseline (improvement)
- Sustained UACR reduction of  $\geq$  30 % from baseline.
- Onset of renal impairment, defined as sustained eGFR (MDRD) < 60 mL/min/1.73m<sup>2</sup> in patients with eGFR  $\geq$  60 mL/min/1.73m<sup>2</sup> at baseline
- Onset of overt CKD, defined as sustained\* eGFR (MDRD) < 60 mL/min/1.73m<sup>2</sup> or onset of sustained\* macroalbuminuria (UACR > 300mg/g) in patients with eGFR  $\geq$  60 mL/min/1.73m<sup>2</sup> and normo- or microalbuminuria at baseline
- Sustained increase of serum creatinine  $\geq$  2-fold from baseline, accompanied by an estimated glomerular filtration rate (eGFR) of < 60 mL/min/1.73m<sup>2</sup> (MDRD).
- Composite diabetic retinopathy endpoint 1 defined as use of retinal laser coagulation therapy or treatment with intravitreal injection(s) of an anti-vascular endothelial growth factor (VEGF) therapy for diabetic retinopathy
- Composite diabetic retinopathy endpoint 2 defined as use of retinal laser coagulation therapy or treatment with intravitreal injection(s) of an anti-VEGF therapy for diabetic retinopathy or vitreous haemorrhage or diabetes-related-blindness
- Silent MI

- Composite microvascular outcome 1 (renal death, sustained ESRD, sustained 50% decrease or more in eGFR from baseline, albuminuria progression, use of retinal photocoagulation or intravitreal injection(s) of an anti-VEGF therapy for diabetic retinopathy or vitreous haemorrhage or blindness)
- Composite microvascular outcome 2 (renal death, sustained ESRD, sustained 40% decrease or more in eGFR from baseline, albuminuria progression, use of retinal photocoagulation or intravitreal injection(s) of an anti-VEGF therapy for diabetic retinopathy or vitreous haemorrhage or blindness).
- Composite microvascular outcome 3 (renal death, sustained ESRD, sustained 30% decrease or more in eGFR from baseline accompanied by eGFR (MDRD) <60 ml/min/m<sup>2</sup>, albuminuria progression, use of retinal photocoagulation or intravitreal injection(s) of an anti-VEGF therapy for diabetic retinopathy or vitreous haemorrhage or blindness).
- Albuminuria progression (defined as change from normoalbuminuria to micro- or macroalbuminuria or as change from microalbuminuria to macroalbuminuria from baseline to any measurement post-baseline)
- Heart failure adverse events (based on narrow SMQ 20000004 ‘cardiac failure’)
- Hospitalisation for heart failure or all-cause mortality By adjudication confirmed events will be used for hospitalisation for heart failure.
- Occurrence of and time to first occurrence of 3P-MACE after severe hypoglycaemia or hypoglycaemia with plasma glucose <54 mg/dL
- Occurrence of and time to first occurrence of all-cause mortality after severe hypoglycaemia or hypoglycaemia with plasma glucose <54 mg/dL
- Occurrence of and time to first severe hypoglycaemia or hypoglycaemia with plasma glucose <54 mg/dL reported as adverse event

Endpoints not analyzed as time to event endpoints:

- Transition in albuminuria class
- Transition of eGFR (CKD-EPI) and eGFR (MDRD) categories
- Urine albumin creatinine ratio (UACR) change from baseline over time
- eGFR (MDRD and CKD-EPI) change from baseline over time
- eGFR (MDRD and CKD-EPI) slope from baseline to last value on-treatment
- eGFR (MDRD and CKD-EPI) slope from baseline to last value collected during follow-up visit



- eGFR (MDRD and CKD-EPI) slope from last value on-treatment to follow-up value
- Number of events of hospitalisation for heart failure
- Number of events of hospitalisation for heart failure or CV death
- Number of events of MI (fatal or non-fatal MI)
- Number of events of stroke (fatal or non-fatal stroke)

Other endpoints are:

- HbA1c (%) change from baseline over time
- Fasting plasma glucose (FPG) (mg/dL) change from baseline over time
- Proportion of patients who at the study end visit achieve glycaemic control (HbA1c  $\leq$  7.0%) without need for additional antidiabetic medication or increase in antidiabetic background medication therapy (between baseline and study end visit).
  - This endpoint will be analysed on all patients in the treated set and in addition on patients with HbA1c  $>$  7.0% at baseline.
- Proportion of patients with HbA1c  $\leq$  7.0% over time and at the study end visit
  - This endpoint will be analysed on all patients in the treated set and in addition on patients with HbA1c  $>$  7.0% at baseline.
- Proportion of patients initiated on insulin after baseline
  - This endpoint will be analysed on all patients in the treated set and in addition on patients without insulin (basal insulin or mixed insulin) use at baseline.
- Time (days) to initiation of insulin (among patients not on insulin at baseline).
- Time to initiation of long-term use of insulin or long-term dose increase in insulin, where long-term is defined as a continuous period of insulin use of more than 3 months
- Change from baseline over time in total daily dose of insulin
- Weight (kg) change from baseline over time
- Proportion of patients with  $\leq$  2% weight gain at the study end visit
- Incidence of fast decline in eGFR, defined as annual loss in eGFR (MDRD)  $\geq$  5mL/min/year.
- Descriptive statistics for mRS
- Recurrent hypoglycaemia adverse events (based on narrow SMQ hypoglycaemia)
- Recurrent events of severe hypoglycaemia or hypoglycaemia with plasma glucose  $<$ 54 mg/dL

Other safety endpoints include:

- Adverse events (including AEs of special interest, hypoglycaemic events and changes from baseline in ECG and physical examination documented as adverse events)
- Change from baseline in safety laboratory parameters. See TSAP Section 7.8.2.
- Additional safety endpoints (see TSAP Section 7.8)
- Vital signs
- Electrocardiogram (ECG).
- Cognitive function endpoints
